# Supplementary material for: Genome-wide analysis, identification, evolution and genomic organization of dehydration responsive element-binding (DREB) gene family in Solanum tuberosum
Source: PeerJ. 2021 Jun 24;9:e11647. doi: 10.7717/peerj.11647 (PMC8236231; doi:10.7717/peerj.11647)
Supplement: Supplemental Information 1 [file peerj-09-11647-s001.xlsx]

## Sheet: Sheet1
Phytozome v12.1 Annotation of 66 StDREB Genes
Gene name	Protein ID	Genomic ID	Phytozome Annotation
StDREB1	PGSC0003DMP400062326	PGSC0003DMG400040222	Dehydration-responsive element-binding protein 1B
StDREB2	PGSC0003DMP400025208	PGSC0003DMG400014309	CRT binding factor 2
StDREB3	PGSC0003DMP400025210	PGSC0003DMG400014311	CRT binding factor 3
StDREB4	PGSC0003DMP400000728	PGSC0003DMG400000365	Dehydration responsive element binding protein
StDREB5	PGSC0003DMP400022162	PGSC0003DMG400012526	DREB1
StDREB6	PGSC0003DMP400025209	PGSC0003DMG400014310	AP2 domain CBF protein
StDREB7	PGSC0003DMP400049990	PGSC0003DMG400028700	Dehydration-responsive element-binding protein 2G
StDREB8	PGSC0003DMP400027846	PGSC0003DMG401015891	Dehydration-responsive element-binding protein 2E
StDREB9	PGSC0003DMP400041406	PGSC0003DMG401023951	Dehydration responsive element binding protein
StDREB10	PGSC0003DMP400006612	PGSC0003DMG400003706	Dehydration-responsive element-binding protein 2G
StDREB11	PGSC0003DMP400008564	PGSC0003DMG400004826	Dehydration-responsive element binding protein 6
StDREB12	PGSC0003DMP400013982	PGSC0003DMG400007951	DRE binding protein 1
StDREB13	PGSC0003DMP400027845	PGSC0003DMG400015890	DREB
StDREB14	PGSC0003DMP400007575	PGSC0003DMG400004255	DREB1
StDREB15	PGSC0003DMP400041039	PGSC0003DMG400023717	AP2/ERF domain-containing transcription factor
StDREB16	PGSC0003DMP400012481	PGSC0003DMG400007036	Ethylene-responsive transcription factor ERF023
StDREB17	PGSC0003DMP400003986	PGSC0003DMG400002235	Transcriptional factor TINY
StDREB18	PGSC0003DMP400060470	PGSC0003DMG400038366	CBF1
StDREB19	PGSC0003DMP400067146	PGSC0003DMG400045042	Dehydration-responsive element-binding protein 1B
StDREB20	PGSC0003DMP400032373	PGSC0003DMG400018581	AP2/ERF domain-containing transcription factor
StDREB21	PGSC0003DMP400039459	PGSC0003DMG400022759	Dehydration-responsive element-binding protein 1B
StDREB22	PGSC0003DMP400021367	PGSC0003DMG400012087	AP2/ERF domain-containing transcription factor
StDREB23	PGSC0003DMP400022161	PGSC0003DMG400012525	DREB1
StDREB24	PGSC0003DMP400012445	PGSC0003DMG400007025	AP2/ERF domain-containing transcription factor
StDREB25	PGSC0003DMP400056374	PGSC0003DMG400034101	AP2 domain class transcription factor
StDREB26	PGSC0003DMP400031126	PGSC0003DMG400017813	AP2/ERF domain-containing transcription factor
StDREB27	PGSC0003DMP400004686	PGSC0003DMG400002620	AP2 domain class transcription factor
StDREB28	PGSC0003DMP400008562	PGSC0003DMG400004825	AP2/ERF domain-containing transcription factor
StDREB29	PGSC0003DMP400047100	PGSC0003DMG400027117	AP2-domain DNA-binding protein
StDREB30	PGSC0003DMP400016762	PGSC0003DMG400009475	Dehydration-responsive element binding protein 3
StDREB31	PGSC0003DMP400027844	PGSC0003DMG400015889	AP2/ERF domain-containing transcription factor
StDREB32	PGSC0003DMP400031469	PGSC0003DMG400018054	AP2/ERF domain-containing transcription factor
StDREB33	PGSC0003DMP400007137	PGSC0003DMG400004005	Drought responsive element binding protein
StDREB34	PGSC0003DMP400022163	PGSC0003DMG400012527	Dehydration-responsive element-binding protein 1B
StDREB35	PGSC0003DMP400005224	PGSC0003DMG400002899	AP2/ERF domain-containing transcription factor
StDREB36	PGSC0003DMP400045958	PGSC0003DMG400026461	AP2/ERF domain-containing transcription factor
StDREB37	PGSC0003DMP400040280	PGSC0003DMG400023295	AP2/ERF domain-containing transcription factor
StDREB38	PGSC0003DMP400001723	PGSC0003DMG400000910	AP2/ERF domain-containing transcription factor
StDREB39	PGSC0003DMP400045347	PGSC0003DMG400026136	Ethylene response factor 1
StDREB40	PGSC0003DMP400024969	PGSC0003DMG400014196	Ethylene response factor
StDREB41	PGSC0003DMP400035842	PGSC0003DMG400020625	AP2/ERF domain-containing transcription factor
StDREB42	PGSC0003DMP400026836	PGSC0003DMG400015312	AP2 domain-containing transcription factor
StDREB43	PGSC0003DMP400063666	PGSC0003DMG400041562	AP2 domain-containing transcription factor
StDREB44	PGSC0003DMP400014999	PGSC0003DMG400008538	Dehydration-responsive element binding protein 3
StDREB45	PGSC0003DMP400054524	PGSC0003DMG400031294	AP2/ERF domain-containing transcription factor
StDREB46	PGSC0003DMP400045166	PGSC0003DMG400026035	AP2/ERF domain-containing transcription factor
StDREB47	PGSC0003DMP400031984	PGSC0003DMG400018352	RAP2
StDREB48	PGSC0003DMP400043872	PGSC0003DMG400025282	AP2/ERF domain-containing transcription factor
StDREB49	PGSC0003DMP400021478	PGSC0003DMG400012154	AP2 domain-containing transcription factor 9
StDREB50	PGSC0003DMP400056687	PGSC0003DMG400034583	AP2 domain class transcription factor
StDREB51	PGSC0003DMP400026844	PGSC0003DMG401015315	Dehydration responsive element binding protein
StDREB52	PGSC0003DMP400001263	PGSC0003DMG400000636	AP2 transcription factor
StDREB53	PGSC0003DMP400015357	PGSC0003DMG400008734	AP2/ERF domain-containing transcription factor
StDREB54	PGSC0003DMP400053612	PGSC0003DMG400030781	Transcriptional factor TINY
StDREB55	PGSC0003DMP400010352	PGSC0003DMG400005837	AP2/ERF domain-containing transcription factor
StDREB56	PGSC0003DMP400061053	PGSC0003DMG400038949	AP2 domain class transcription factor
StDREB57	PGSC0003DMP400022160	PGSC0003DMG400012524	AP2/ERF domain-containing protein
StDREB58	PGSC0003DMP400025206	PGSC0003DMG400014307	CRT binding factor 4
StDREB59	PGSC0003DMP400025207	PGSC0003DMG400014308	CRT binding factor 5
StDREB60	PGSC0003DMP400022109	PGSC0003DMG400012497	Dehydration-responsive element-binding protein 1B
StDREB61	PGSC0003DMP400009887	PGSC0003DMG400005621	AP2/ERF domain-containing transcription factor
StDREB62	PGSC0003DMP400029795	PGSC0003DMG400017051	AP2/ERF domain-containing transcription factor
StDREB63	PGSC0003DMP400063987	PGSC0003DMG400041883	SGR
StDREB64	PGSC0003DMP400056843	PGSC0003DMG400034739	SGR
StDREB65	PGSC0003DMP400069253	PGSC0003DMG400047149	Ethylene-responsive transcription factor CRF4
StDREB66	PGSC0003DMP400042590	PGSC0003DMG400024606	ERF transcription factor
