# Supplementary material for: Genome-wide analysis, identification, evolution and genomic organization of dehydration responsive element-binding (DREB) gene family in Solanum tuberosum
Source: PeerJ. 2021 Jun 24;9:e11647. doi: 10.7717/peerj.11647 (PMC8236231; doi:10.7717/peerj.11647)
Supplement: Supplemental Information 2 [file peerj-09-11647-s002.xlsx]

## Sheet: Sheet1
Detailed physiochemical properties and chromosomal location of 66 StDREB genes
Gene name	Gene ID	Chromosomal location	PF00847 AP2 domain	Protein length (amino acids)	A. thaliana ortholog locus	V (14th) & E (19th)	Molecular weight (kDa)	Isoelectric point (pI)
StDREB1	PGSC0003DMT400090651	11:43909444..43910433	25 – 82	329	At5g51990.1	Only Valine at 14th	36.72	5
StDREB2	PGSC0003DMT400037120	3:42083385..42084095	63 – 120	236	At4g25490.1	BOTH	26.31	4.98
StDREB3	PGSC0003DMT400037122	3:42092856..42093509	61 – 118	217	At4g25470.1	BOTH	24.26	5.2
StDREB4	PGSC0003DMT400000986	12:4255222..4256136	80 - 137	304	At3g60490.1	BOTH	33.34	4.98
StDREB5	PGSC0003DMT400032623	8:108212..108961	50 – 107	249	At1g63030.1	BOTH	28.29	5
StDREB6	PGSC0003DMT400037121	3:42089560..42090336	52 – 109	258	At4g25480.1	BOTH	28.6	4.55
StDREB7	PGSC0003DMT400073853	4:46420658..46421143	32 – 89	161	At2g40350.1	BOTH	18.05	4.74
StDREB8	PGSC0003DMT400041067	10:49605449..49605805	13 – 78	118	At2g38340.1	BOTH	12.94	4.75
StDREB9	PGSC0003DMT400061541	6:30401876..30402838	82 – 139	320	At3g11020.1	BOTH	35.12	4.63
StDREB10	PGSC0003DMT400009506	4:70297509..70298297	30 – 87	262	At1g75490.1	BOTH	28.32	4.78
StDREB11	PGSC0003DMT400012317	8:52058382..52059140	59 – 116	252	At1g71450.1	BOTH	28.55	6.33
StDREB12	PGSC0003DMT400020525	4:67892263..67892700	17 - 74	145	At1g21910.1	BOTH	16.66	9.04
StDREB13	PGSC0003DMT400041065	10:49598328..49599724	70 – 101	438	At2g40340.1	BOTH	49.99	4.35
StDREB14	PGSC0003DMT400010876	12:54274315..54274938	46 - 103	207	At1g12610.1	BOTH	23.42	5.36
StDREB15	PGSC0003DMT400060970	10:57640535..57641476	29 – 86	313	At3g57600.1	BOTH	35.35	6.16
StDREB16	PGSC0003DMT400018137	5:44997352..44997888	29 – 86	178	At1g01250.1	BOTH	20.09	6.74
StDREB17	PGSC0003DMT400005709	8:39081813..39082436	30 – 87	207	At2g25820.1	BOTH	22.78	6.15
StDREB18	PGSC0003DMT400088795	1:7249526..7250161	54 – 111	211	At4g25480.1	BOTH	23.84	5.74
StDREB19	PGSC0003DMT400095471	10:55638929..55639495	15 – 73	188	At2g36450.1	BOTH	20.35	5.04
StDREB20	PGSC0003DMT400047804	11:42517186..42518353	15 – 72	185	At1g77200.1	BOTH	20.59	6.62
StDREB21	PGSC0003DMT400058587	8:53983513..53984634	102 - 158	268	At1g63040.1	BOTH	28.69	5.63
StDREB22	PGSC0003DMT400031522	10:15342288..15342983	68 – 125	231	At2g44940.1	BOTH	26.23	7.07
StDREB23	PGSC0003DMT400032622	8:111184..111900	51 – 108	238	At1g12610.1	BOTH	26.83	5.08
StDREB24	PGSC0003DMT400018079	5:45387224..45387925	56 – 113	233	At5g11590.1	BOTH	26.78	5.16
StDREB25	PGSC0003DMT400084506	3:8142283..8142807	34 – 91	174	At3g50260.1	BOTH	19.01	7.66
StDREB26	PGSC0003DMT400045933	11:27792517..27793008	7 – 64	163	At1g33760.1	BOTH	18.24	5.44
StDREB27	PGSC0003DMT400006751	3:60259940..60260686	67 – 124	248	At4g16750.1	BOTH	26.83	6.97
StDREB28	PGSC0003DMT400012314	8:52070056..52070781	59 – 116	241	At4g32800.1	BOTH	27.49	5.47
StDREB29	PGSC0003DMT400069733	5:47695599..47696828	82 – 139	409	At5g05410.1	BOTH	46.12	4.63
StDREB30	PGSC0003DMT400024508	4:62775125..62776228	187 - 244	367	At1g78080.1	Only Valine at 14th	40.46	5.38
StDREB31	PGSC0003DMT400041064	10:49592373..49593746	69 – 134	457	At5g18450.1	BOTH	52.29	4.45
StDREB32	PGSC0003DMT400046516	11:27629964..27630494	13 – 72	176	At1g12630.1	BOTH	20.29	5.64
StDREB33	PGSC0003DMT400010228	2:43456465..43456965	28- 85	166	At4g36900.1	BOTH	18.31	8.32
StDREB34	PGSC0003DMT400032624	8:94749..95530	18 – 75	201	At1g12630.1	BOTH	22.05	4.74
StDREB35	PGSC0003DMT400007511	12:3156875..3157627	20 – 77	250	At1g74930.1	Only Valine at 14th	27.91	4.54
StDREB36	PGSC0003DMT400068040	12:50774618..50775274	38 – 95	218	At3g16280.1	Only Valine at 14th	24.48	5.06
StDREB37	PGSC0003DMT400059885	7:39688641..39689123	16 – 73	160	At5g21960.1	Only Valine at 14th	18	5.75
StDREB38	PGSC0003DMT400002375	11:10801722..10802414	39 – 98	230	At1g44830.1	Only Valine at 14th	25.5	5.52
StDREB39	PGSC0003DMT400067218	6:45876312..45877578	7 – 64	196	At4g39780.1	Only Valine at 14th	22.48	8.94
StDREB40	PGSC0003DMT400036817	3:57040085..57041096	7 – 64	159	At5g65130.1	Only Valine at 14th	18.28	6.91
StDREB41	PGSC0003DMT400053152	4:51602406..51603518	166 - 223	370	At2g22200.1	Only Valine at 14th	40.57	5.61
StDREB42	PGSC0003DMT400039576	12:798253..799314	122 - 179	353	At1g36060.1	Only Valine at 14th	40.46	8.4
StDREB43	PGSC0003DMT400091991	12:748927..749949	109 - 166	340	At1g22190.1	Only Valine at 14th	38.8	6.39
StDREB44	PGSC0003DMT400022023	12:55247124..55248143	154 - 211	339	At5g65130.1	Only Valine at 14th	37.19	6.97
StDREB45	PGSC0003DMT400080372	9:58938695..58939471	88 – 145	258	At4g13620.1	Only Valine at 14th	29.02	9.11
StDREB46	PGSC0003DMT400066977	1:69794428..69795210	92 – 149	260	At2g35700.1	Only Valine at 14th	29.2	6.14
StDREB47	PGSC0003DMT400047265	7:48940955..48942124	183 - 240	389	At4g28140.1	Only Valine at 14th	44.19	5.26
StDREB48	PGSC0003DMT400065067	6:36781505..36782083	35 – 91	192	At5g25810.1	BOTH	20.6	4.74
StDREB49	PGSC0003DMT400031685	8:55812209..55813093	109 - 166	294	At1g64380.1	Only Valine at 14th	33.45	8.89
StDREB50	PGSC0003DMT400085012	1:5274045..5274464	78 – 136	139	At2g22200.1	Only Valine at 14th	16.08	9.75
StDREB51	PGSC0003DMT400039593	12:755611..755829	4 – 61	72	At1g36060.1	Only Valine at 14th	8.3	9.97
StDREB52	PGSC0003DMT400001703	3:56523139..56523918	6 – 63	206	At1g22190.1	Only Valine at 14th	22.99	8.42
StDREB53	PGSC0003DMT400022528	1:32182672..32183061	6 – 66	129	At1g71520.1	Only Valine at 14th	14.35	9.13
StDREB54	PGSC0003DMT400079094	6:40997742..40998473	11 – 68	243	At4g31060.1	Only Valine at 14th	26.76	4.69
StDREB55	PGSC0003DMT400014953	8:5091368..5092306	102 - 159	312	At1g64380.1	Only Valine at 14th	35.23	7
StDREB56	PGSC0003DMT400089378	1:5192491..5196768	249 - 303	340	At2g23340.1	Only Valine at 14th	38.7	8.43
StDREB57	PGSC0003DMT400032621	8:114752..115486	50 – 107	244	At4g25470.1	BOTH	27.49	5.01
StDREB58	PGSC0003DMT400037118	3:42061320..42061712	33 – 90	130	At4g25490.1	BOTH	14.51	4.31
StDREB59	PGSC0003DMT400037119	3:42065342..42065710	33 – 90	122	At5g51990.1	BOTH	13.1	4.17
StDREB60	PGSC0003DMT400032532	8:100530..101779	31 – 88	213	At5g52020.1	BOTH	23.58	5.29
StDREB61	PGSC0003DMT400014324	3:59319063..59320049	25 – 82	328	At4g28140.1	Only Valine at 14th	36.39	5.26
StDREB62	PGSC0003DMT400043930	1:71210216..71211064	27 – 84	282	At4g28140.1	Only Valine at 14th	31.69	8.97
StDREB63	PGSC0003DMT400092312	3:35393272..35394216	64-121	314	At2g40220.1	BOTH	34.84	5.87
StDREB64	PGSC0003DMT400085168	3:35389493..35390365	46-103	290	At2g40220.1	BOTH	32.24	5.61
StDREB65	PGSC0003DMT400097578	1:5188089..5188679	102-159	196	At1g78080.1	Only Valine at 14th	22.07	9.66
StDREB66	PGSC0003DMT400063264	3:54533730..54534263	31-88	177	At1g75490.1	BOTH	20.162	9.26
