# Supplementary material for: Genome-wide analysis, identification, evolution and genomic organization of dehydration responsive element-binding (DREB) gene family in Solanum tuberosum
Source: PeerJ. 2021 Jun 24;9:e11647. doi: 10.7717/peerj.11647 (PMC8236231; doi:10.7717/peerj.11647)
Supplement: Supplemental Information 3 [file peerj-09-11647-s003.xlsx]

## Sheet: Sheet1
Protein sequences of 66 StDREBs for Phylogenetic analysis
Gene name	Protein Sequences
StDREB1	MLLLASKIPKKRGGRKKFRETRHPVYRGVRWKNFEKWVSEVRVPGKKSRIWLGTFPNAEMAARAHDVAVMALKGRSACLNFADSAWRLPVPASATAKDIQKAAAEATETFRASESLERENSEEVVVNNDDHYVVDSGWRLAIPASAAARDIQKATAEAAEAFRPSESSKGEYFEEVDSTWRLSISASAAAKHIQKAAAEAFCHSESSEGENYSEEVIINDDQLITQYLIDSTWRLPIPASVAAKAATEAFCPSKSSEGENSEEVTIDEQVIQDIVVPKFTEYNELFMDEEAIFYMPELLVNMAEGLMLPPPQCTYGMEPHDIDMSLWSY
StDREB2	MFPSYYSEPLTQLSSSSSSILSDNSNHYSPNNNFSDEEVINLASNNPKKPAGRKKFRETRHPVFRGIRMRNSGKWVCEVREPNKKSRIWLGTFPTAEMAARAHDVAALALRGRSACLNFADSVWRLPIPASSNSKDIQKAAAEAAEIFRPSSLEESEEVSGECSNTTTPETPEKALSMNEEAQVNSFFMDEEALFYMPGLIANMAEGLMLPLPQCLEIGDYVEADDAYMSLWNYSI
StDREB3	MDIFRSYYSDPQIESSSSFSDTTTYNSPNRANHSDEEVILASNNPKKPAGRKKFRETRHPVYRGVRMRNSGKWVCEVREPNKKTRIWLGTFPTAEMAARAHDVAAIALRGRSACLNFADSAWRLPTPASSDTKDIQKAAAEAAESFRPLKSEEESVVITGDQSSTPDDMFFMDEEALFCMPGLLTNMAEGLMVPPPQCTEMGDHVEADDMPLWSYSI
StDREB4	MSTEQPNCSESTESSCNSSSSSPPSSPSFVLLQPLPQINSKNRLKRCRGEEEEVNEVVNNANPNPKKISKNNNGGSTDVSYVGVRMRAWGKWVSEIREPKKKSRIWLGTFATPEMAARAHDVAAMSIKGTSAILNFPQFSHLLPRPATCSPRDVQSAAVKAAHMDHLNPKNSSSSCSTSTSLLPEPSPASMTSSSSSLSLASGITSSSSCEKDDEESRPSPLEEVFLVPEATGQLSEIVELPRLGSSYELVESTQSLFESDEWWDNNYGNCEYYFGQENYISNMEFTGLENVVSTSFESFLWQH
StDREB5	MNDNNFRDHYLHETSTSSGGVQDEGIFLLASSQPKKRAGRKKFKETRHPIYRGVRRRDNNKWVCEVREPIEQKRIWLGTYPTPEMAARAHDVAALALRGNLATLNFADSSWRLAVPVSKDPEELRQAAMKAAEAFLQDTESVEINYMNHEEINYSEGVKCQENIVVGGASGSDNNNLVGNEVNNIQNMEMDSILCYNNNWGGNNEIEGSSWQEKMSEGHLFSPTPHLDSYFSWDDVESDVEVSLWSYNM
StDREB6	MNIFETYYSDPLILTESSSSSSSSSDEEIILASNNPKRPAGRKKFRETRHPIYRGIRMRNSGKWVCEVREPNKKSRIWLGTFPTAEMAARAHDVAALALRGRSACLNFADSAWRLPIPASSNSKDIQKAAAEAAEIFRPSSSSEESEEVSGESDYSTPETPENAFSAAAEIFRPSSEESEEVSGESDNSTPETPENAFFMNEEAPESSFFMDEEALFFMPGLIANMAEGLMLPPPQCAEMGDHYVEADAYMTLWNYSI
StDREB7	MAECVESKKSIVGRSRKGCMRGKGGPENALCTYRGVRQRTWGKWVAEIREPNRGARIWLGTFNTSVEAARAYDDAARRLYGSDAKLNLSEEEESIISSDTEISCMENNIIEECSVLEEASIFKDGNGEYLVWDTPAPNLLGLDFHGDATSFNWTDEPEIMY
StDREB8	MPGKGGPENSSCKYRGVRQRTWGKWVAEIREPVYISGEYKNRGKRLWLGSFATADEAAIAYDEAAKVMYGSNATLNFPNYCGSSSNDTSSLESSGQSSVDHEDLVVDDAEKIEIESDL
StDREB9	MAIMDQAANMATLPLDYSGKRKSRSRRDRTKNVEERLAKWKEYNEKLDSVDDEGKPVRKVPAKGSKKGCMRGKGGPENSRCKYRGVRQRIWGKWVAEIREPKRGSRLWLGTFGTAIEAALAYDEAARAMYGPCARLNLPNYPSRDDSDSASWATTSASDCTVASGGFGGEVCPGEGATTAAGTPLSSVKDEGKDETAGLPGEMEIVEPTSIDQDTLKSGWDCLDNLNLDEMFDVDELLAMLDSTPVSTNDFGSDGKQYAYDNNLLSNSPCQPLGDPQEMGQEAPMTFDYAFDFLKPGRQEDLNFNSDDLTFMDLDSELVV
StDREB10	MSTTSKKLIPATSRKGCMRGKGGPENASCTYKGVRQRTWGKWVAEIREPNRGARLWLGTFDNSYDAAVVYDAAALKLYGAEAKLNLPHLYSIPAQDQSQAQSQIQNSRPITIMSPSLAPVSATAPASVPAPPVPSVYNVASPSTWSVGTDSSLYFNDHDFGISNFSANDIPSAFNLIDINKTADDHPDEFVVKNDNATNNNQSSQGLGGEMFRDLNMNLPEIDDSSIWEEAKATTSFQEAVNDPGIGGYNLDDGLNFPPWCG
StDREB11	MEEKDESPIIFNNNQTIPSSSLTKRSITLKPSKQQSNHNKKIKSSTEKTKKIDDSKHPIYHGVRKRSWGKWVSEIREPRKKSRIWLGTFSTAEMAARAHDVAAIAIKGDLALLNFPELAHQFPKPASKCAKDIQSAAAKAAALNISPRNFMEKQSKCELMEMLCSPEETESTESSSSSSSSSLRSNNEDPFLDLPDLLLDLTQKFDKFCYYNSTWDLAGAVSNDSNYCEFWPQEDLYLWDYSHETALEVPQL
StDREB12	MMEGEKRKQREHQQDKPYRGIRMRKWGKWVAEIREPNKRSRIWLGSYSSPVAAARAYDTAVFYLRGPSARLNFPEFIVDDHENHDLSAASIRKKATEVGARVDALQTAIHNSTAIPPESNSKSTRMMMKPDLNEYPTPESCDEDN
StDREB13	MDFCVDRKLKRRRNGSDSIDEILLRWRNFNKEVNSNNEQVKKKKKRKSPGNGSNKGCMPGKGGPENSGCKYRGVRQRTWGKWVAEIREPVYISAAKVMYGSNAILNFPNCCDRSSNTRTSSLESSVQSSIDHEDLGVDDAKNIEIESDLKTSDTPDDDDDDGNGVVSTDLCYDYANHGSPARCLTDEELELIPEKNSLIDLECNSRYFPKSQKSCVKVEIPVIEEEIDKDEFVHNDVSNTIDVEPTVMCSKDDFSRPDENCNSNDQIVLQDMDYSMNILQEQPLDFRSSENLNEDVSTSLEYMDHFLMNDNCSMEATNISDIFSLKENHDEGFDFQRFLEESFDFKPMIVPQESSELNYAKNEEQFDCTYAYNQQIELQNSETNSEIRSDGIQKEQNLG…
StDREB14	MNDSSNSCSSNRTERSDEENILLVSSNKPKKRAAGRKKFKETRHPVFRGVRKRNNDKWVCEIREPTKQKQIWLGTYPTAEMAARAHDVAALALKGELATLNFADSAWRLPVPVSKDPKELRQAAARAAEAFEPVRDVAPQENNNVVVDCNMVVDENDNSNSCGIEEWVANMEEESLFSPNPCLFGSHFNWDDHVESDVEVSLWNYTI
StDREB15	MDSYKRNPLKPWKKGPARGKGGPQNALCEYRGVRQRTWGKWVAEIREPKKRTRLWLGSFATAEEAAMAYDEAARRLYGPDAYLNLPHMRANFNPLNKSQKFKWFSSTNNFVSSLIPNTTGLLNLSAQPNVHVIHQRLQELKRAEAAAATASSSSSSISDLPKNGTQNYSKLQPEYLTMTSPQVMIKEKEDEFSSHNNVAVRGDQAEKPQIDLNEFLQQIGIMKRDDHQQQPPDKNQDHDHNNNNSISSFTESGVSLKDDSSIAHLFGDTTSYNWDTLGAITGIEEDHEVAAEEANSFYNVNDELMFPSSIWNF
StDREB16	MEQVKSPPSSRAITNCRGGGGGSSTRHPIYRGVRRRRWGKWVSEIREPKKKSRIWLGSFISPETAARAYDVAAYCLKGSKAELNFPDEIERLPRPISSGARDIQAAATMAANMGIVKGKNDEDRCCSDDFWEEIELPELRDIAGKDYYLSSESDHNYFNSEVWQWNSCGVEFPSDNII
StDREB17	MNSVAAQDNNEIISNNKSIKRNRDSSKHPVFRGVRMRNWGKWVSEIREPRKKSRIWLGTFPNPEMAARAHDVAALSIKGNSAILNFPELAGLLPRPATLSPRDIQAAAAKAAAMDKFDNNNGITSPNNSISSNMSTSSSLSSLVSAIDLATSEELTQIIELPRLGTSFFGDELKNDFVFADMETGWLYPDDGGMISSCFEPSLLWNY
StDREB18	MDFEDALTSSSSSSSDHDNKEKNIDLSSCSTNNNNVQFKRRAGRKKFKETRHPLYRGVRRRNGEKWVCEIREPNKKTRIWLGTFSTPEIAARAHDVAALALRGSNALLNFPGSAWSLPKAKSSSPQDIQIAVLQVNKELVVSSSPLEEPSCKPKDDEVNSLMEFMDEEAMFNMPIFIDSMAEGMLLTPPAMKRGFNWGDVEEDVEFTLWKD
StDREB19	MSSSGENNGSGRHPVYKGIRRRKSSGKWVSEIREPRSPNRIWLGTFPTPEMAAVAYDVAALALKGRDAELNFPNSAPSLPVPATNSPRDIQTAAACAAAALGAAGDALVGGRSSSNSNSRAVSREVEDNYLMPNNNEYNFMDEDLIFDMPNVIMNMAEGMLLSPPRLNHLPPDDDYIGGADQNLWNYP
StDREB20	MEGKKKKKRNGEEVLYRGVRMRNWGKWVSEIREPRKKSRIWLGTFSSPEMAARAHDVAALSIKGTAAILNFPKLASYLPRPASLSPRDIQAAATKAASMKNFDSLLSSSSSSSSSLSVATTNLGTMSEELTQIIELPQLETCIDDSFDQLKNELLYVDDLNMGGWLYSDNNEEIISSCFEPFNLL
StDREB21	MADSQNSTKSNQVIQPPHQSSESTKTPFNPTPPPPIPPPPAPPPPPETHIQTTNTLLSKFENTNSTPKTVQLPNIIPATIMSSTSSGSSGSPSRPIGGKHAVFRGIRCRSGKWVSEIREPRKTTRIWLGTYPTPEMAAAAYDVAAMALKGNDAVINFPGNINSYPSLPPSPAAADIRKAAATAAALMKIETGETTSGTQPGTDDHQSSGSVHMMETRDHEYIDEEALFDMPNLLVDMAEAMMVSPPRMSSPRSDDSPGHSDAENLWSY
StDREB22	MKVQLEKSNSLDSSSSSSSSSSFNEGNINTKILKEYESNKVEEFNRDDNENKRRKKVIQDDHDDKHPTYRGVRKRNWGKWVSEIREPRKKSRIWLGTYLTAEMAARAHDVAALAIKGHSAYLNFPYLADQLPRPTSNYPKDIQIAAAKAAATSFSGNKAESSHIKLHSSSSSTETFITSPLTDKDDTFFNLPDLSINKVDQIDSYCYPISTWHLPGTDVGFWPEEPFLWQS
StDREB23	MNNNSSLYSSDLNPLSATTPSDEEGLILLLASSRPKKRAGRKKFKETRHPVYRGVRRRNNNKWVCELREPSQQKRIWLGTYPTPEMAARAHDVAALALRGNLATLNFADSRWRLPVPASKDPKDIRQAAVIAAQAFSQDTEVDYMNEEVNSNTTDEIDIARVNNGSSSDFSAKELSMDMENILSCNGGEDNYMLETEGWREKMAEELLFSPTPRLGSCFSWDDVETSDVEVSLWSYSI
StDREB24	MENQEEIINLENRHDFICNGLNSPSNTATSSSSFSRKIEEEKKKKKRNDDDNKHPTYRGVRKRSWGKWVSEIREPKKKSRIWLGTYPTAQMAARAHDVAALAIKGCSAHLNFPHLVDQYPRPASTCHKDIQAAAAKAAAIPFPEEDEEEEDRVESDQVELRNCHSSTNLFLENTKESLNSPSREDDDTFFDLPDLSIDMVDQTNSYWCTMSTWQQLIGADTTVYRLDEPFLWE
StDREB25	MEVDGVRSGDAGVVGGGGGGGGGCCSGKRKNERAYKGIRMRKWGKWVAEIREPNKRSRIWLGSYTTPVAAARAYDTAVYYLRGPSARLNFPELLVGDSGELSDLSADAIRKKAVEVGARVDAIQSSMAISDDDGDGDNQLRRHESPARLKPCWFQEKPDLNLKPEPEGPEFDYW
StDREB26	MGGITSEYRGVRKRKWGKWVSEIREPGKKTRIWLGSFETAEMAAAAYDSAAFHLRGHAAKLNFPELIGHFPKPASSSPEDIRLAAQQAAITVQNTNIMASTSHGHEAPVTVGLSPTQIQAINDFPMDSPNMWTTHEDINFTYEMSDYQEMDDCLWDYSSTNSF
StDREB27	MAEVEVQISETESSSNTNTSVSSSSSSLSADSMHKSVFDSSNKLPKGKKRPTKKQKAITNSESRHQIYRGVRMRSWGKWVSEIREPRKKSRIWLGTYPTAEMAARAHDVAAVSIKGKSAILNFPHLIDSLPRPLSNSPRDVQAAAAKAASMRDPPSSASSSSSSSSSSSSTTSTGSEELCEIIELPNLAESDDSKTELRPSDSVEGLLYSPWWADHSTDFCGYFLEQSAAGAGESLISCSFETLKWAC
StDREB28	MEEKDESPIIFNNNQTTSSSSLTKRPITLKSSNQETNHNKKIKSSTEKTKKIDDSKHPIYHGVRKRSWGKWVSEIREPRKKSRIWLGTFSTAEMAARAHDVAAIAIKGHLALLNFPELAHQFPKPSSKCAKDIQSAAAKAAALDILPRNFMEKQSTDELMEMPCSPEEIESTESSLRSNNEDPFLDLPDLLMDLTQKFDKFYYDNSPWDLAGAVSNDSNYCEFWPEEDLCLWDYILEAPQL
StDREB29	MAVLDQTSNMMLPMDYTRKKKSRSRKDAPKNVADTLAKWKEVNEKLDACDDDGRKPVRKVPAKGSKKGCMKGKGGPDNGRCKYRGVRQRTWGKWVAEIREPHRGRRLWLGTFDTAIEAALAYDEAARAMYGPCARLNLLDYYPSSKESSKDDSSLPTESHSDSNTASSFSEVCPADDMMRGRANVPEIRYEDGASEIKFDGTRTGSNKVGTPLSSLREEAKDEAKEVLDKSETFTPLRSLREEAEDKAKEVLDKSETFEIKEEPVACSYDSWDIGQEDLGNLCLDDEMFDVNELLGMMDSTPLDASAPSQDVGFVPPKQEQYAYDPSYRLQNAAYDNNQLSNPSYQLENADDQFSNPYQLDNADVNTLEGLQQMEQQPPIEIDYDFDFLRPGRQEDFNF…
StDREB30	MAAMDFWNSTSVDFQSSSEPITSGGELMEALEPFMKSASSSPSPPPSTFPPVFPSSSSSTFPSSDFQSYPSFPPPTPTLSYPYTSSFYPSSQSTMSSEVCSTSTEMNSQIFSTRFSGYGMEQQGSIGLNQLTPIQIQQIQAQINFQNQQQQQQMMLQTAHHASTMNFLAPKPVPMKQSGSPPKPSKLYRGVRQRHWGKWVAEIRLPKNRTRLWLGTFDTAEEAALAYDKAAYMLRGDFARLNFPQLRHNGNLIGGDFGEYNPLHSSVDAKLKDICQSLAQGKSIDSKKKKTKGSSAEKAAVVKMEEEESKTVEVGSESDGSGSGSGGSSPVTELIFPEFTEEEPTWDMSENFLLQKYPSHEIDWASL
StDREB31	MDFYVNRKLKRRRNGSDSIDEILLRWRNFNPEVNSNNEQVKKKKRKSPGNGSNKGCMPGKGGPENSGCKYRGVRQRTWGKWVAEIREPVYISGEFKSKGKRLWLGTYSTAGDAAIAYDEAAKVMYGSNAILNFPNCCDSPITRTSSLESSGQSSVDHEDLVIDNAKNIEIESDLKTSDTPEDDGGGVVNTDLSYDYANHGSPACSWTEEELEVITEENSVIELTNLEYDSRFFPKSQKSCVKVETPIMEEEIDKDEFVHNDVSNTIDMKPTVMFNKDDFSRPEEICNSNDQIVLQDMDFRSSENLNEDVSTRLEYMEHFLMEDNCSMEATNISDIFSMTENHDEAFDFQRFLEESFDFKPMVVPQESAELNYAKNQEQFECKYAYNQQIDLQNSETNSE…
StDREB32	MEDDQESKNNIDMYRGVRKRKWGKWVSEIREPGKKTRIWLGSYETAEMAAAAYDVAAFHLKGERPNLRLNFPELIHTFPKPSSSRPEDVQMAAHEAAMRFKRPIDDHPDNCGAGPVRVGLSPSQIQAINESPLDSPKMWMELAGLLPVREYTCPSSSFEDHQWDEIQYHHDSIWDF
StDREB33	MEIGGGGQSGVAASSGVCCGGKRKNERPYKGIRMRKWGKWVAEIREPNKRSRIWLGSYSTPVAAARAYDTAVYYLRGPSARLNFPELLVGDGGLNDLSAASIRKKAIEVGAQVDAVQNSLATHHNHTEEKVHCETASPSELKPCWFQEKPDLNLKPEPEDPEVDYW
StDREB34	MTDPSHATKSRTNTKHPIYRGIRCRSGKWVCEIREPRKTTRIWLGTYPTPQMAAAAYDVAALALKGTQNVVLNFPHLVDSYPKLPPSPSPADIQRAAATAAGAMASLGDDDDRSLESRDGAICNERGSTEFPSSSGNYDMQIGTQTTAGEEEYVDEEALFEFPSLLVNMAEAMMLSPPRINSFQSEDYSSGDFDAESLWSY
StDREB35	MVKPNSKDTEFSPSSSSSSLYRGVRKRKWGKWVSEIRLPNSRERIWLGSYDTPEKAAKAFDAALFCLRGKGANFNFPENPPEIMNGRSMTPSEIQSAAAQFANNTEPELIRVGPRENSDLSSSSSEIFLAESPSVSVSDRVESEKTEITLGNDFINMYRVESPVSGRVESEKTEMSLDNGFMDMFSSLGTVNDMSDFGIFPGFDDLSGEFFIPPPSPQPSQMPNLESLEEENYLNYDGFQSQGTSFLWNF
StDREB36	MAELVQSSPISVSKTEEPEEKEKEKRMEKRRRDESYPVYRGVRMRSWGKWVSEIRQPRKKSRIWLGTYPTPEMAARAHDVAALSIKGNSAILNFPQLVESLPRPASISPRDVQAAAAKAAAMDELNSSVSSSSTLSESMEETMTVAAASEDQLGQIIELPNLEGIFESEKMKLSDSGEGWVYPPPWGEFEDEFCGYFFEHTAIGESLIPSKFETMKWA
StDREB37	MVRPKVSKEKKVKGDRYKGVRMRKWGKWVAEVRQPKSRDRIWLGSYDTAEEAARAYDAAVVCLRGSSAMINFPDDPPVISCDGDHKLLSPSEIQVEASRHARSTREESAAAADDAVDHGRSAAVESVFFRDDLEFECSSLDHGEVVLHDDLFDSARMWSF
StDREB38	MVKTEQKSLVEPNKKSMSISSSSSSTSSNINNMKMKKNKYKGVRMRSWGSWVSEIRAPNQKTRIWLGSYSTPEAAARAYDAALLCLKGPSASSNLNFPFDSSFYHHIDHHTSTTLSPKAIQRVAAAAAATPEQNVGLVLSDDSTNPTILSSPSPPPSSSTTTTSSEDINDVCLLPNYTFDQEMSMIEQWYNFDSPKYNDMLHGTVFFDPPSMEDVYYEESSADIPLWSFC
StDREB39	MARAQQRYRGVRQRHWGSWVSEIRHPLLKTRLWLGTFETAEDAARAYDEAARLMCGPRARTNFPYNPNMPQTSSSKLLSTTLTAKLHKCYMASLQMTKTSPQEQKIAKNATNVQESVINSYKMKQQMLVPKPSVQLTHYHEEAKTVNLGVIRKVEDQVLEGIPQFVKPLEDDHIEQMIEELLDYGSIELCSNVPSH
StDREB40	MSRPQQRYRGVRQRHWGSWVSEIRHPSLKTRIWLGTFETSEDAARAYDEAARLMCGSTARTNFPYNATESTRFLSSALIAKLQKCHMTSLTATSKRPGKTKLEDKKEKEISTNRGDGEERQSESASQQYMKALEDEHIEQMIEELLDYGSIEMCSVLNE
StDREB41	MAAAIDIYSSSNFSDPLTEELMKALEPFMKGASCSSFSSSSPSSSSSSSFYTFGEPNLYTDFCAIPSTATQMFSQGYSCFNNMGVAETGSIGLNHLTPSQILQIQAQIQFQNQQQLLQLHQQQQSLGLLTPTSTYSKNLNSTNFLGMKPVPMKQTGGASSQKATKLYRGVRQRHWGKWVAEIRLPKNRTRLWLGTFDTAEEAALAYDKAAYKLRGEFARLNFPHLRHQLNNEFSPLHSSVDAKLQAICQSLANPKSDDLCSKSNSKPRKSKTAAAAVPVDSNSAQESSSKSEITIDDSLKGEFSYPENANIKIEASSSSPAPSEESSSSPESDITFLDFAEPPSFDESENFFLPKYPSVEIDWAALCNLL
StDREB42	MENIESIDNVQSIMSMYRPLKKLKINPSSQHNSLRSSGDGVEPVAQRIRARGYEPQFRFPFALDDPPSSNCHLNWQSLTQNQTMISFAPQSCFNQCRITDNGTRTTTMMNVYGTVSSPVPKQYRGVRQRHWGKWVAEIRLPRKRTRLWLGTFESAEEAAFAYDVEAFRLRGTDARLNFPHLFLGDLAPSDKNIDETNSASSSTTSFAKIPSQIQNNKRCIRQCRNKNRVPSAVEQSTSVLDKEIRMQNKAAYNKPLWYDPSQDSVRNESFVHQTSQIKMFDGSDFYESTPKYTSNIQQENSDMWKNVLQSNPFGNYSICTDDNLQQQQQPCDFTITDPGFGDDVFNFSSKLLE
StDREB43	MSMYRPLKKLKISPSSQHNNLRSSGDGVEPVAQRIRAHGYESQFPFPFALDDPPSSNCHINWQSLTQNQTMISFAPQSCFNQCRITNSGTRTTTMMNVYGTVSSPAPKRYRGVRQRHWGKWVAEIRLPRERTRLWLGTFESAEEAAFAYDVEAFRLRGTDARLNFPHLFLGDLAPTDNNIDETNSASSSTTSFAKNPSQIQNNKRCIRQCRNKNRVPSAMEQSTSVLDREISMQAKAAYNKPLWYDPSQDFVHNESLVHETFQIKMLDGSDFYESTPKYTCSIQQENSDIWKNVLQSSPFGNYSICTDDNLQQQQQQCDFTITDPGFGDDVFDFSSNPLE
StDREB44	MATSTKDFWTTTLLDLNSSNSGGELMEALAPFIKSASSPSPSPSVSPYFDLQSSSLSTSYLYESFSSTSQPNMSYYDNGCSTSSTITPTFSQGFSGIMEAEQPGSIWLNQAQIYLPQQIMPAVTFQNNNQYVSYLGPKPVSMKQSGSPPKPPKLYRGVRQRHWGKWVAEIRLPKNRTRLWLGTFDTAEEAALAYDKAAYKLRGEFARLNFPHLRHNGSLIGSEFGEYKPLHSSVDAKLQAICQDLAQGKSIDTKKKRKVSSKAMVVVVEEKEDNKRKTTAEAGSESDGSGSGSGSGSGSGSGSSPILEYTFDSIWDMCSENYVLHKDPSQEIFNWASLL
StDREB45	MSSSIGHESQIHYQEAATTNPTNWLKMNQTITNCTTTKGFSDYWLSTTKTQPMKFKGSSRKSSLIHYENSPSSSSSSPSSMTASQGKLFRGVRQRHWGKWVAEIRLPRNRTRVWLGTFDTAEEAAFAYDTAAYMLRGDYAHLNFPHLKNQLKANSINGNITSLLEAKIRAISAQSKKANNISDRDENIISPKGLSDDNATIKNTIIQNQEKEINCEKLMEITKVKNINQENVDGVQLSRMPSLDMDMIWDALLVSDLS
StDREB46	MEDHNEFSISSSTTTSSFTSCCSNNNCLSSTSTSSTSSNCFHESIAKTSPNDHYKCKSKKSSKKIQDGNEEEDDNKKIRRKNEGVVDEKHPTYRGVRKRNWGKWVSEIRQPRKKSRIWLGTYPTAEMAARAHDVAALAIKGDSAYLNFPHLADQLPRPASTSPKDIQAAAAKAAAANIFLEEKSQLTELHSSHSSTNLASQELLNSPSMDHDDPFFDLPDLTIDRVDQNDRYQYPISTWQLAGADSGMFRLDEPFLWECY
StDREB47	MAEPEEQMEFDDNTFERQQRRPVFEEASMSNRRFKKIKSPERQSSVQQPSLNSFVPCNNPTSMPFPPPPSSSRLVFPFAFDGTQQSMDSSSQLGTNAMPLFHPQQQNQQQMISFSPQQCLYPPYFAGDLGPSQNQQQMLRYWNETLNLSPRGRMMMMSRLGQDSRGIFRPQQVQVQPISATKLYRGVRQRHWGKWVAEIRLPRNRTRLWLGTFDTAEDAAMAYDREAYKLRGDNAKLNFPELFIGKDKGEPSLSSPIAPHESSLPEQNSESLELQPINNELPPSPPPQPPPEGDNHDKDSGIGSSEVTTNSQSSELVWGDMAEAWFNATGWGPGSPVWDDLDSNNNLMFPPNLHFGNFCQQEPHNSDPHQHHDMNSDPSSPSCPMRPFF
StDREB48	MADYHFNVSPNDNSPPLENLSPTGGTLLSPRRHPNFRGIRQRNGKWVSEIREPRKTTRIWLGTFPNPEMAAVAYDVAALALKGPDAQLNFPDCAYSYPIPASLSAADIRAAAANAAAARAPPLSEFSTAGGTAAAAAGGGQEFVDEEEIFGMPKLLDDMAEAMLVSPPRMHQSTSYDESPENSDADSLWSYP
StDREB49	MDRNQENNSMTTIFDEAARIRSSLSQLILTSGTNTFDTIFSHCQENNQMTNSPVFEPLGTSVYLRQRDLLHKFCQENIANIPIPTTSKTIPFRNSLYTQSYKFPEKKKLYRGVRQRHWGKWVAEIRLPQNRMRVWLGTYETAEAAAYAYDRAAYKLRGEYARLNFPNLRDPSKLGFGDGEKMNAVKNAVDAKIQAICQKVKREKSKKAAKKKSENESKVKETMDSSSSTTTTTTTTSMISPSVSEDGLWKSEDSTCSVFGDCLKDPLMESEFDSCSLARMPSFDPELIWEVLAN
StDREB50	MGERFVVLPHVVRIYITDNDATNSSSDEEENLQGEMSKRHKRICKEIIIRNGKTNVTSKMVSSKEKTDTKLLQENVKNYRGVRQRKWGRWVAEIRDVRMNKRRWLGSFDTALEAALAYDKATIELKGANAVKESNPIHH
StDREB51	MMNVYGTVSQRHWGKWVAEIRLPRKRTRLLLGTFGSTEEAAFAYDVEASRLRGTDARLNFPHLVLAFDMFNS
StDREB52	MVQAKKFRGVRQRHWGSWVAEIRHPLLKRRVWLGTFETAEEAARAYDEAAVLMSGRNAKTNFPVQATDENKKDNSKSNNSALSAGSSSSSLSAILSAKLRKSCKSPSPSLTCLRLDTESSNIGVWQKRAGARPDSSWVMTVEFGKKKIINDNEQIMIIPDENVTSSSTFSSQDQNSIEIEEGKECGVMNEEERMALQMIEELLNRN
StDREB53	MSSGAKYRGIRRRKWGKWVSEIRVPGSSERLWLGTYTSPEAAAIAHDIAYYCLRPESSSLHKLNFPSMLPPNVQPGMSPTSVQKVASDAAMAIDAQFLTIPTPAQQHRQTADNYGQNQGLNISVEDYQY
StDREB54	MEANPTHDQPKFKGVRLRKWGKWVSEVRLPNSRDRIWLGSYDSAEKAARAFDAAQFCLRGPKAKFNFPDSPPDISGGQRLSPAEIQAVAARFANDYSPSVVQEIQRDDHEGNIGNINSHVINMEKDEISLSTTSSCDVPPMVVQMGTSTVAEMDWAFYNDMMENYPYNASGPPPEFFCDPYYPGAGIGAGAGAGGGGVLDINLSSNLYSPPHFPQRTTPNYDDDDTGNGGDEHYSQQSFLWNF
StDREB55	MSYTYDEAAQIRSSLSQILLTSSTNTLDSIFFHCQEPKNQMTTTSPVLEPLCSSVYLRQKDLLQNFWEQNRTNITIPTTSTQTPLQESLYSQRYVSPNKKKLYRGVRQRHWGKWVAEIRLPQKRMRVWLGTYDNAEAAAYAYDRAAYKLRGEYARLNFPNLRDPSELGFGDSAKMNALKNSVDAKIQAICQKVKRERAKKGGKKIVESEKKVAKNVDLDSSSCSSSSLVDSESWSHSDVISQSSSDDGFLNSEKSPCSVLGDCPMGPENDNCHVTSITHHFERSVLESEFEDYSLAAMPSFDPELIWAVLAS
StDREB56	MRGPDAVTNILKPPPREVQPMENNLINPPPKEINFMNLSSSSSNDARIVWITDSSNEPTTYCDGLDLDLYASSVPDCWMFVARISRKEGYQKTLKNDATKKSTVQVEGSSSVQPNPAGVYLWGVNLMNVSNEDKEKVKEEKSKGRGKTRQKKIITENENVEAISIENSKEKPQENVEKYKGVRQRKWGCDLMNPSNEEKGKVKEEKSEQDEMTCEKEMIVKNNIENTDEISIENSKGKQIKLPQKNVKKYKGVRQRKWVSEVQVPKMRNRIWLGMFDMSEEAALTYDKAVIEMRGPDAVTNILKPPPREVQPMENNLINPLPKEINFMNLSSSSSNDARV
StDREB57	MNNDSSLYSSDLNPLSATIASDEEGILLLASSRPKKRAGRKKFKETRHPIYRGVRRRNNSKWVCELREPSQQKRIWLGTYSTPEMAARAHDVAALALRGNLATLNFADSRWRLPVPASKDPKDIRQAAVIAAQAFSQDTELVGIDGMIEEINSSTIDEIKYQEIDITRANNGSSRDFGAKELCIDMENNLCCNWGEDNDMLEMEGWQEKMAEGLLFSPTPRLGSCFSWDDVESEVEVSLWSYSI
StDREB58	MAARAHDVAALALRGRSACLNFADSAWRLPIPASSNSKDIQKAAAEAAEIFRPSEESERVASSEMHESIFFMNDEGRESSFFMDEEALFDMPGLIANMAEGLMLPPPQCAEVEDHYYMEADDAYMPLWNY
StDREB59	MAARAHDVAAIALRGGSACLNFADSAWRLPTPASSDTKDIQKAAAEAAESFRPLKSEEESVVSTGDQSSTPDNMFFMDEEALFCMPGLLTNMAEGLMVPPPQCTEMGDHVEADDMPLWSYSI
StDREB60	MANLSHTSGQLVPNILVDNKKSARTNTKHPIYRGIRCRSGKWVCEIREPRKTTRIWLGTYPTPQTAAAAYDVAALALKGTQNIVLNFPHLVNSYPKLPPSPSPDNIRCAAATAATMMAQRGDDGRSSGSKTTAICNEEGSVESSLSENYAMQIGNTQMITGEEEYVDEEELFDFPSLLVNMAEAMMLTPPRINSTSLEEYSPRDFDIENLWSY
StDREB61	MKPPVPQPSDGIRTRRKPSSRGHPRFVGVRQRPSGRWVAEIKDSLQKVRLWLGTFDTAEDAARAYDQAARTLRGANARTNFELPASDSHQGSSILENSVPFNFEEACRTEEPENSLVGALKAKLFNSKNSRSFIQAYASNSTSQLASKVKPSLPCIEIKKTSSQTEKLPKIDKYSDDLFRGNHNLDYISLMTNDYQPMISSSQCQDNQWYSGTNSAIMWDNEQGRLPWGEPQMSPVQDEVSFSTTINNNIFGGTATCTWPVSVSGEPMVDLSTFGEVDVLNGSIMMPDMNGLTQIASVPTEQQFLQFENGLWGVGDNAVWDPFLLSSV
StDREB62	MKTTITTNTNTTKSSSTQPKKSSITRKFVGVRQRPSGRWVAEIKDSSQRVRLWLGTYDTAEEAAHAYDEAARALRGENARTNFASTAPNSDMDQSHSSHDTKHGLSFSSIKEKLSKNLQSIMARNSENKSSSSSKSITRVSDHFTFARIFHFKNNYDQQYQNHHRHVDMNKVVQPSIRVLPQDVTDNNNNNDLCWENSSSVSDCSSEWAAFRQLGLDSDNYGSDGSDQYFVGSDPLMAGWISSPDIMSNSTNEGSSRSKRFKVSSSVMVPPTFSEKIMYHFN
StDREB63	MNSTSAGSNNDQHPHPTQDLDLTNQEDKTTTASLTTQTSSEENSSSRNKKGSKGKGGPDNNKFRYRGVRQRSWGKWVAEIREPRKRTRRWLGTFATAEDAARAYDRAAIILYGSKAQLNLQPSGANATSSSSNSSKRGSATLSSTTQTLRPLLPRPPSGFDLSFSSSSSTLLPPNVLAPANNYIPYGFYPAVQYAEDISQNPQHSIQKQTFDDNYGFLDGETTKASGMIWSDSNSNPNPNPREEYQNQQYNQLQHQHNCLYDNINTFADAAPVVSDPVAAVVSPIFWPPIADDNYNYHPADIWDYGNDPFLFDF
StDREB64	MNSTSAGSDNPHPTQDINHQEKSTSEEKSNKKGSKGKGGPDNNKFRYRGVRQRSWGKWVAEIREPRKRTRRWLGTFATAEDAARAYDRAAIILYGSKAQLNLQPSGANASSSSSNSSKRGSTSSTTQTLRPLLPRPPSGFDLSFSSSSSTLLPPNVLAPANNYLPYGFYPAVQYAEDISQNPQYSIQKQTFDDNYGYLDGETTKASGMIWSDSNSNPNPNPNPREEDQNQQYNQHNCLYDNVNTFVDAAPVVSDPVASPVLWPPIIDDNDNYHPADIWDYGNNDPFLFDF
StDREB65	MTSKNKYHEKKVIRKPSKNDATKNSTVQVEGSSSIQPNPARVYLWGVDLMNLSNHEDKGKVKEEKSKGRDKTRQKKIFSENENVKAISIENSKEKPQENVEKYKGVRQRKWGKWVAEVYDPRTKGRIWLGTFNTAEEAALVYNKAAIAIKGVNAVTNIIKPAPTDLPLAEITSINPSSKEIDFMNLPSSSLDGDRI
StDREB66	MENSKSSSESLNNSSKNIQQNKPISSNDGKKFIGVRQRPSGRWVAEIKETSQKLRLWLGTFDKAEEAALAYDSAARLLRGRNAKTNFKNQGILKPNEENCSLLEKNPRLYQLMKHAIMKKLAGKYQNNERLETEEELVQESINKEEICEIQLQGSSKVYSSVIVAPSFSNNEKSYQF

## Sheet: Sheet2
Protein Sequences of 56 AtDREBs for Phylogenetic Analysis
Gene ID	Protein Sequences
At4g25480.1	MNSFSAFSEMFGSDYESSVSSGGDYIPTLASSCPKKPAGRKKFRETRHPIYRGVRRRNSGKWVCEVREPNKKTRIWLGTFQTAEMAARAHDVAALALRGRSACLNFADSAWRLRIPESTCAKDIQKAAAEAALAFQDEMCDATTDHGFDMEETLVEAIYTAEQSENAFYMHDEAMFEMPSLLANMAEGMLLPLPSVQWNHNHEVDGDDDDVSLWSY
At4g25470.1	MNSFSAFSEMFGSDYESPVSSGGDYSPKLATSCPKKPAGRKKFRETRHPIYRGVRQRNSGKWVCELREPNKKTRIWLGTFQTAEMAARAHDVAAIALRGRSACLNFADSAWRLRIPESTCAKEIQKAAAEAALNFQDEMCHMTTDAHGLDMEETLVEAIYTPEQSQDAFYMDEEAMLGMSSLLDNMAEGMLLPSPSVQWNYNFDVEGDDDVSLWSY
At4g25490.1	MNSFSAFSEMFGSDYEPQGGDYCPTLATSCPKKPAGRKKFRETRHPIYRGVRQRNSGKWVSEVREPNKKTRIWLGTFQTAEMAARAHDVAALALRGRSACLNFADSAWRLRIPESTCAKDIQKAAAEAALAFQDETCDTTTTNHGLDMEETMVEAIYTPEQSEGAFYMDEETMFGMPTLLDNMAEGMLLPPPSVQWNHNYDGEGDGDVSLWSY
At5g51990.1	MNPFYSTFPDSFLSISDHRSPVSDSSECSPKLASSCPKKRAGRKKFRETRHPIYRGVRQRNSGKWVCEVREPNKKSRIWLGTFPTVEMAARAHDVAALALRGRSACLNFADSAWRLRIPETTCPKEIQKAASEAAMAFQNETTTEGSKTAAEAEEAAGEGVREGERRAEEQNGGVFYMDDEALLGMPNFFENMAEGMLLPPPEVGWNHNDFDGVGDVSLWSFDE
At1g63030.1	MENDDITVAEMKPKKRAGRRIFKETRHPIYRGVRRRDGDKWVCEVREPIHQRRVWLGTYPTADMAARAHDVAVLALRGRSACLNFSDSAWRLPVPASTDPDTIRRTAAEAAEMFRPPEFSTGITVLPSASEFDTSDEGVAGMMMRLAEEPLMSPPRSYIDMNTSVYVDEEMCYEDLSLWSY
At1g12610.1	MNNDDIILAEMRPKKRAGRRVFKETRHPVYRGIRRRNGDKWVCEVREPTHQRRIWLGTYPTADMAARAHDVAVLALRGRSACLNFADSAWRLPVPESNDPDVIRRVAAEAAEMFRPVDLESGITVLPCAGDDVDLGFGSGSGSGSGSEERNSSSYGFGDYEEVSTTMMRLAEGPLMSPPRSYMEDMTPTNVYTEEEMCYEDMSLWSYRY
At3g11020.1	MAVYEQTGTEQPKKRKSRARAGGLTVADRLKKWKEYNEIVEASAVKEGEKPKRKVPAKGSKKGCMKGKGGPDNSHCSFRGVRQRIWGKWVAEIREPKIGTRLWLGTFPTAEKAASAYDEAATAMYGSLARLNFPQSVGSEFTSTSSQSEVCTVENKAVVCGDVCVKHEDTDCESNPFSQILDVREESCGTRPDSCTVGHQDMNSSLNYDLLLEFEQQYWGQVLQEKEKPKQEEEEIQQQQQEQQQQQLQPDLLTVADYGWPWSNDIVNDQTSWDPNECFDINELLGDLNEPGPHQSQDQNHVNSGSYDLHPLHLEPHDGHEFNGLSSLDI
At5g05410.1	MAVYDQSGDRNRTQIDTSRKRKSRSRGDGTTVAERLKRWKEYNETVEEVSTKKRKVPAKGSKKGCMKGKGGPENSRCSFRGVRQRIWGKWVAEIREPNRGSRLWLGTFPTAQEAASAYDEAAKAMYGPLARLNFPRSDASEVTSTSSQSEVCTVETPGCVHVKTEDPDCESKPFSGGVEPMYCLENGAEEMKRGVKADKHWLSEFEHNYWSDILKEKEKQKEQGIVETCQQQQQDSLSVADYGWPNDVDQSHLDSSDMFDVDELLRDLNGDDVFAGLNQDRYPGNSVANGSYRPESQQSGFDPLQSLNYGIPPFQLEGKDGNGFFDDLSYLDLEN
At2g40350.1	MPRKRKSRGTRDVAEILRKWREYNEQTEADSCIDGGGSKPIRKAPPKRSRKGCMKGKGGPENGICDYTGVRQRTWGKWVAEIREPGRGAKLWLGTFSSSYEAALAYDEASKAIYGQSARLNLPLLPLCQARLLHFLMNLKFVHVRIQMQDLVLVRSD
At1g75490.1	MSSIEPKVMMVGANKKQRTVQASSRKGCMRGKGGPDNASCTYKGVRQRTWGKWVAEIREPNRGARLWLGTFDTSREAALAYDSAARKLYGPEAHLNLPESLRSYPKTASSPASQTTPSSNTGGKSSSDSESPCSSNEMSSCGRVTEEISWEHINVDLPVMDDSSIWEEATMSLGFPWVHEGDNDISRFDTCISGGYSNWDSFHSPL
At3G57600.1	MEKSSSMKQWKKGPARGKGGPQNALCQYRGVRQRTWGKWVAEIREPKKRARLWLGSFATAEEAAMAYDEAALKLYGHDAYLNLPHLQRNTRPSLSNSQRFKWVPSRKFISMFPSCGMLNVNAQPSVHIIQQRLEELKKTGLLSQSYSSSSSSTESKTNTSFLDEKTSKGETDNMFEGGDQKKPEIDLTEFLQQLGILKDENEAEPSEVAECHSPPPWNEQEETGSPFRTENFSWDTLIEMPRSETTTMQFDSSNFGSYDFEDDVSFPSIWDYYGSLD
At2G40340.1	MPSEIVDRKRKSRGTRDVAEILRQWREYNEQIEAESCIDGGGPKSIRKPPPKGSRKGCMKGKGGPENGICDYRGVRQRRWGKWVAEIREPDGGARLWLGTFSSSYEAALAYDEAAKAIYGQSARLNLPEITNRSSSTAATATVSGSVTAFSDESEVCAREDTNASSGFGQVKLEDCSDEYVLLDSSQCIKEELKGKEEVREEHNLAVGFGIGQDSKRETLDAWLMGNGNEQEPLEFGVDETFDINELLGILNDNNVSGQETMQYQVDRHPNFSYQTQFPNSNLLGSLNPMEIAQPGVDYGCPYVQPSDMENYGIDLDHRRFNDLDIQDLDFGGDKDVHGST
At5g18450.1	MEEEQPPAKKRNMGRSRKGCMKGKGGPENATCTFRGVRQRTWGKWVAEIREPNRGTRLWLGTFNTSVEAAMAYDEAAKKLYGHEAKLNLVHPQQQQQVVVNRNLSFSGHGSGSWAYNKKLDMVHGLDLGLGQASCSRGSCSERSSFLQEDDDHSHNRCSSSSGSNLCWLLPKQSDSQDQETVNATTSYGGEGGGGSTLTFSTNLKPKNLMSQNYGLYNGAWSRFLVGQEKKTEHDVSSSCGSSDNKESMLVPSCGGERMHRPELEERTGYLEMDDLLEIDDLGLLIGKNGDFKNWCCEEFQHPWNWF
At2g38340.1	MEKEDNGSKQSSSASVVSSRRRRRVVEPVEATLQRWEEEGLARARRVQAKGSKKGCMRGKGGPENPVCRFRGVRQRVWGKWVAEIREPVSHRGANSSRSKRLWLGTFATAAEAALAYDRAASVMYGPYARLNFPEDLGGGRKKDEEAESSGGYWLETNKAGNGVIETEGGKDYVVYNEDAIELGHDKTQNPMTDNEIVNPAVKSEEGYSYDRFKLDNGLLYNEPQSSSYHQGGGFDSYFEYFRF
At2g40220.1	MDPLASQHQHNHLEDNNQTLTHNNPQSDSTTDSSTSSAQRKRKGKGGPDNSKFRYRGVRQRSWGKWVAEIREPRKRTRKWLGTFATAEDAARAYDRAAVYLYGSRAQLNLTPSSPSSVSSSSSSVSAASSPSTSSSSTQTLRPLLPRPAAATVGGGANFGPYGIPFNNNIFLNGGTSMLCPSYGFFPQQQQQQNQMVQMGQFQHQQYQNLHSNTNNNKISDIELTDVPVTNSTSFHHEVALGQEQGGSGCNNNSSMEDLNSLAGSVGSSLSITHPPPLVDPVCSMGLDPGYMVGDGSSTIWPFGGEEEYSHNWGSIWDFIDPILGEFY
At4g16750.1	MQDSSSHESQRNLRSPVPEKTGKSSKTKNEQKGVSKQPNFRGVRMRQWGKWVSEIREPRKKSRIWLGTFSTPEMAARAHDVAALAIKGGSAHLNFPELAYHLPRPASADPKDIQEAAAAAAAVDWKAPESPSSTVTSSPVADDAFSDLPDLLLDVNDHNKNDGFWDSFPYEDPFFLENY
At1g12630.1	MNSSMASAGLGSRRKDPVYRGIRCRSGKWVSEIREPRKTTRIWLGTYPMAEMAAAAYDVAAMALKGREAVLNFPGSVGSYPVPESTSAADIRAAAAAAAAMKGCEEGEEEKKAKEKKSSSSKSRARECHVDNDVGSSSWCGTEFMDEEEVLNMPNLLANMAEGMMVAPPSWMGSRPSDDSPENSNDEDLWGY
At2g36450.1	MQGTSKDNGGRHPLYRGVRQRKNSNKWVSEIREPRKPNRIWLGTFSTPEMAAIAYDVAALALKGSQAELNFPNSVSSLPAPTSMSPADIQAAAASAAAAFGAARDAIVMANNNSQTSGVACMNSSYDNTNMNGFMDEDLVFDMPNVLMNMAEGMLLSPPRPTVFDAAYDADGFPGGDDYLWNFP
At2g35700.1	MERDDCRRFQDSPAQTTERRVKYKPKKKRAKDDDDEKVVSKHPNFRGVRMRQWGKWVSEIREPKKKSRIWLGTFSTAEMAARAHDVAALAIKGGSAHLNFPELAYHLPRPASADPKDIQAAAAAAAAAVAIDMDVETSSPSPSPTVTETSSPAMIALSDDAFSDLPDLLLNVNHNIDGFWDSFPYEEPFLSQSY
At2G44940.1	MARQINIESSVSQVTFISSAIPAVSSSSSITASASLSSSPTTSSSSSSSTNSNFIEEDNSKRKASRRSLSSLVSVEDDDDQNGGGGKRRKTNGGDKHPTYRGVRMRSWGKWVSEIREPRKKSRIWLGTYPTAEMAARAHDVAALAIKGTTAYLNFPKLAGELPRPVTNSPKDIQAAASLAAVNWQDSVNDVSNSEVAEIVEAEPSRAVVAQLFSSDTSTTTTTQSQEYSEASCASTSACTDKDSEEEKLFDLPDLFTDENEMMIRNDAFCYYSSTWQLCGADAGFRLEEPFFLSE
At1g63040.1	MADPNNPITEPKAIIQSSTSSSVTIVPVPTCGDSLSDSATCENPCPLDTITTTTTTVCFAAPSSTASGNDINTLMATDTDISRRKKNPVYRGIRCRSGKWVSEIREPKKTTRVWLGTYPTPEMAAAAYDVAALALKGGDTLLNFPDSLGSYPIPLSSSAAHIRCAAAAAAATRGAAGAAVKVGQKKEDKVYDTAESSTMGFVDEEELLNMPGLLADMAKGMMVAPPWMGSPPSDDSPENSDGESLWSY
At2g25820.1	MVDSHGSDTECSSKKKKEKTKEKGVYRGARMRSWGKWVSEIREPRKKSRIWLGTFPTAEMAARAHDVAALSIKGSSAILNFPELADFLPRPVSLSQQDIQAAAAEAALMDFKTVPFHLQDDSTPLQTRCDTEKIEKWSSSSSSASSSSSSSSSSSSSMLSGELGDIVELPSLENNVKYDCALYDSLEGLVSMPPWLDATENDFRYGDDSVLLDPCLKESFLWNYE
At3g60490.1	MGKQINIESSATHHQDNIVSVITATISSSSVVTSSSDSWSTSKRSLVQDNDSGGKRRKSNVSDDNKNPTSYRGVRMRSWGKWVSEIREPRKKSRIWLGTYPTAEMAARAHDVAALAIKGNSGFLNFPELSGLLPRPVSCSPKDIQAAATKAAEATTWHKPVIDKKLADELSHSELLSTAQSSTSSSFVFSSDTSETSSTDKESNEETVFDLPDLFTDGLMNPNDAFCLCNGTFTWQLYGEEDVGFRFEEPFNWQND
At3g16280.1	MTSLNSSASPTSSSSDQSDATTTTSTHLSEEEAPPRNNNTRKRRRDSSSASSSSSMQHPVYRGVRMRSWGKWVSEIRQPRKKTRIWLGTFVTADMAARAHDVAALTIKGSSAVLNFPELASLFPRPASSSPHDIQTAAAEAAAMVVEEKLLEKDEAPEAPPSSESSYVAAESEDEERLEKIVELPNIEEGSYDESVTSRADLAYSEPFDCWVYPPVMDFYEEISEFNFVELWSFNH
At5g11590.1	MAEEYYSLRSERVTQLLVPNSESDSVSDKSKAEQSEKKTKRGRDSGKHPVYRGVRMRNWGKWVSEIREPRKKSRIWLGTFPTPEMAARAHDVAALSIKGTAAILNFPELADSFPRPVSLSPRDIQTAALKAAHMEPTTSFSSSTSSSSSLSSTSSLESLVLVMDLSRTESEELGEIVELPSLGASYDVDSANLGNEFVFYDSVDYCLYPPPWGQSSEDNYGHGISPNFGHGLSWDL
At1g33760.1	MENTYVGQRDYRFNVNQLSYRGIRRRKWGKWVSEIREPGKKTRIWLGSYETAEMAAAAYDAAALHLRGRGTNLNFPELVDSFPRPESSSSEHIQAAAQDAALMFKPGRLSEPALESGQGLSRVGLSPDQIQAINESPLDSPRMGWMQDLEVADYEELYGQFFGQHDRDEFFEMQQFQSIWNSNN
At4G32800.1	MADSSSDKEKKENNKQPVYRGVRMRSWGKWVSEIREPRKKSRIWLGTFPTAEMAMRAHDVAAMSIKGTSAILNFPELSKLLPRPVSLSPRDVRAAATKAALMDFDTTAFRSDTETSETTTSNKMSESSESNETVSFSSSSWSSVTSIEESTVSDDLDEIVKLPSLGTSLNESNEFVIFDSLEDLVYMPRWLSGTEEEVFTYNNNDSSLNYSSVFESWKHFP
At1g77200.1	MTESSIISVKQSSPVPEEEDHHHHQQDSHRTNTKKRVRSDPGYRGVRMRTWGKWVSEIREPRKKSRIWLGTFSTPEMAARAHDAAALTIKGTSAVLNFPELATYLPRPASSSPRDVQAAAAVAAAMDFSPSSSSLVVSDPTTVIAPAETQLSSSSYSTCTSSSLSPSSEEAASTAEELSEIVELPSLETSYDESLSEFVYVDSAYPPSSPWYINNCYSFYYHSDENGISMAEPFDSSNFGPLFP
At1g71450.1	MAGLRNSGNSDKAQNDGKGVPSAYRGVRKRKWGKWVSEIREPGTKNRIWLGSFETPEMAATAYDVAAFHFRGREARLNFPELASSLPRPADSSSDSIRMAVHEATLCRTTEGTESAMQVDSSSSSNVAPTMVRLSPREIQAINESTLGSPTTMMHSTYDPMEFANDVEMNAWETYQSDFLWDP
At1g01250.1	MSPQRMKLSSPPVTNNEPTATASAVKSCGGGGKETSSSTTRHPVYHGVRKRRWGKWVSEIREPRKKSRIWLGSFPVPEMAAKAYDVAAFCLKGRKAQLNFPEEIEDLPRPSTCTPRDIQVAAAKAANAVKIIKMGDDDVAGIDDGDDFWEGIELPELMMSGGGWSPEPFVAGDDATWLVDGDLYQYQFMACL
At5G52020.1	MSNNNNSPTTVNQETTTSREVSITLPTDQSPQTSPGSSSSPSPRPSGGSPARRTATGLSGKHSIFRGIRLRNGKWVSEIREPRKTTRIWLGTYPVPEMAAAAYDVAALALKGPDAVLNFPGLALTYVAPVSNSAADIRAAASRAAEMKQPDQGGDEKVLEPVQPGKEEELEEVSCNSCSLEFMDEEAMLNMPTLLTEMAEGMLMSPPRMMIHPTMEDDSPENHEGDNLWSYK
At5G25810.1	MIASESTKSWEASAVRQENEEEKKKPVKDSGKHPVYRGVRKRNWGKWVSEIREPRKKSRIWLGTFPSPEMAARAHDVAALSIKGASAILNFPDLAGSFPRPSSLSPRDIQVAALKAAHMETSQSFSSSSSLTFSSSQSSSSLESLVSSSATGSEELGEIVELPSLGSSYDGLTQLGNEFIFSDSADLWPYPPQWSEGDYQMIPASLSQDWDLQGLYNY
At4g36900.1	METATEVATVVSTPAVTVAAVATRKRDKPYKGIRMRKWGKWVAEIREPNKRSRIWLGSYSTPEAAARAYDTAVFYLRGPSARLNFPELLAGVTVTGGGGGGVNGGGDMSAAYIRRKAAEVGAQVDALEAAGAGGNRHHHHHQHQRGNHDYVDNHSDYRINDDLMECSSKEGFKRCNGSLERVDLNKLPDPETSDDD
At3G50260.1	MDAGVAVKADVAVKMKRERPFKGIRMRKWGKWVAEIREPNKRSRLWLGSYSTPEAAARAYDTAVFYLRGPTATLNFPELLPCTSAEDMSAATIRKKATEVGAQVDAIGATVVQNNKRRRVFSQKRDFGGGLLELVDLNKLPDPENLDDDLVGK
At1g74930.1	MVKQAMKEEEKKRNTAMQSKYKGVRKRKWGKWVSEIRLPHSRERIWLGSYDTPEKAARAFDAAQFCLRGGDANFNFPNNPPSISVEKSLTPPEIQEAAARFANTFQDIVKGEEESGLVPGSEIRPESPSTSASVATSTVDYDFSFLDLLPMNFGFDSFSDDFSGFSGGDRFTEILPIEDYGGESLLDESLILWDF
At4g31060.1	MPPSPPKSPFISSSLKGAHEDRKFKCYRGVRKRSWGKWVSEIRVPKTGRRIWLGSYDAPEKAARAYDAALFCIRGEKGVYNFPTDKKPQLPEGSVRPLSKLDIQTIATNYASSVVHVPSHATTLPATTQVPSEVPASSDVSASTEITEMVDEYYLPTDATAESIFSVEDLQLDSFLMMDIDWINNLI
At1g44830.1	MVKTLQKTPKRMSSPSSSSSSSSSTSSSSIRMKKYKGVRMRSWGSWVSEIRAPNQKTRIWLGSYSTAEAAARAYDAALLCLKGSSANNLNFPEISTSLYHIINNGDNNNDMSPKSIQRVAAAAAAANTDPSSSSVSTSSPLLSSPSEDLYDVVSMSQYDQQVSLSESSSWYNCFDGDDQFMFINGVSAPYLTTSLSDDFFEEGDIRLWNFC
At1g77640.1	MVKQELKIQVTTSSSSLSHSSSSSSSSTSALRHQSCKNKIKKYKGVRMRSWGSWVTEIRAPNQKTRIWLGSYSTAEAAARAYDAALLCLKGPKANLNFPNITTTSPFLMNIDEKTLLSPKSIQKVAAQAANSSSDHFTPPSDENDHDHDDGLDHHPSASSSAASSPPDDDHHNDDDGDLVSLMESFVDYNEHVSLMDPSLYEFGHNEIFFTNGDPFDYSPQLHSSEATMDDFYDDVDIPLWSFS
At1g21910.1	MVKQERKIQTSSTKKEMPLSSSPSSSSSSSSSSSSSSCKNKNKKSKIKKYKGVRMRSWGSWVSEIRAPNQKTRIWLGSYSTAEAAARAYDVALLCLKGPQANLNFPTSSSSHHLLDNLLDENTLLSPKSIQRVAAQAANSFNHFAPTSSAVSSPSDHDHHHDDGMQSLMGSFVDNHVSLMDSTSSWYDDHNGMFLFDNGAPFNYSPQLNSTTMLDEYFYEDADIPLWSFN
At1g71520.1	MDSRDTGETDQSKYKGIRRRKWGKWVSEIRVPGTRQRLWLGSFSTAEGAAVAHDVAFYCLHRPSSLDDESFNFPHLLTTSLASNISPKSIQKAASDAGMAVDAGFHGAVSGSGGCEERSSMANMEEEDKLSISVYDYLEDDLV
At2g23340.1	METEAAVTATVTAATMGIGTRKRDLKPYKGIRMRKWGKWVAEIREPNKRSRIWLGSYATPEAAARAYDTAVFYLRGPSARLNFPELLAGLTVSNGGGRGGDLSAAYIRRKAAEVGAQVDALGATVVVNTGGENRGDYEKIENCRKSGNGSLERVDLNKLPDPENSDGDDDECVKRR
At1g46768.1	MEREQEESTMRKRRQPPQEEVPNHVATRKPYRGIRRRKWGKWVAEIREPNKRSRLWLGSYTTDIAAARAYDVAVFYLRGPSARLNFPDLLLQEEDHLSAATTADMPAALIREKAAEVGARVDALLASAAPSMAHSTPPVIKPDLNQIPESGDI
At1G19210.1	MEGSSSSMQSKYKGVRKRKWGKWVSEIRLPNSRERIWLGSYDTPEKAARAFDAALYCLRGNNAKFNFPDNPPVISGGRNLSRSEIREAAARFANSAEDDSSGGAGYEIRQESASTSMDVDSEFLSMLPTVGSGNFASEFGLFPGFDDFSDEYSGDRFREQLSPTQDYYQLGEETYADGSMFLWNF
At5g67190.1	MEGGGVADVAVPGTRKRDRPYKGIRMRKWGKWVAEIREPNKRSRLWLGSYSTPEAAARAYDTAVFYLRGPTARLNFPELLPGEKFSDEDMSAATIRKKATEVGAQVDALGTAVQNNRHRVFGQNRDSDVDNKNFHRNYQNGEREEEEEDEDDKRLRSGGRLLDRVDLNKLPDPESSDEEWESKH
At1g22810.1	MDYRESTGESQSKYKGIRRRKWGKWVSEIRVPGTRDRLWLGSFSTAEGAAVAHDVAFFCLHQPDSLESLNFPHLLNPSLVSRTSPRSIQQAASNAGMAIDAGIVHSTSVNSGCGDTTTYYENGADQVEPLNISVYDYLGGHDHV
At5G21960.1	MDASPKYTGVRKRKWGKWVAEIRLPNSRDRIWLGSFDSAEKAARAFDAALYCLRGPGARFNFPDNPPEIPGGRSLTPQQIQVVASRFACEEELLPPEQHHPSPPRGDHNTEEEVIISARGEINSGSGGPTLGQVGEDNNNEGNSNDTSSYWPLIWEEENFVGPPNSDHEFGFFTDDSTNLYFPTQQQQQHQLSSDFYYDGACEDDFSHYNINLWNF
At4G06746.1	MVIQYKRKQEFPMVKEGMVMTEKPKRNLISSNEKRYKGIRMRKWGKWVAEIREPNKRSRIWLGSYKTAVAAARAYDTAVFYLRGPSARLNFPEEVFKDGNGGEGLGGDMSPTLIRKKAAEVGARVDAELRLENRMVENLDMNKLPEAYGL
At2G22200.1	METASLSFPVPNTSFGVNKSMPLGLNQLTPYQIHQIQNQLNHRRSTISNLSPNRIRMKNLTPSTSKTKNLYRGVRQRHWGKWVAEIRLPKNRTRLWLGTFETAEKAALAYDQAAFQLRGDIAKLNFPNLIHEDMNPLPSSVDTKLQAICKSLRKTEEICSVSDQTKEYSVYSVSDKTELFLPKAELFLPKREHLETNELSNESPRSDETSLLDESQAEYSSSDKTFLDFSDTEFEEIGSFGLRKFPSVEIDWDAISKLANS
At4g13620.1	MITPIHTQHSLILVYINIYSPPILSKLRTGFILWTNTQKTNKKRNMEDQFPKIETSFMHDKLLSSGIYGFLSSSTPPQLLGVPIFLEGMKSPLLPASSTPSYFVSPHDHELTSSIHPSPVASVPWNFLESFPQSQHPDHHPSKPPNLTLFLKEPKLLELSQSESNMSPYHKYIPNSFYQSDQNRNEWVEINKTLTNYPSKGFGNYWLSTTKTQPMKSKTRKVVQTTTPTKLYRGVRQRHWGKWVAEIRLPRNRTRVWLGTFETAEQAAMAYDTAAYILRGEFAHLNFPDLKHQLKSGSLRCMIASLLESKIQQISSSQVSNSPSPPPPKVGTPEQKNHHMKMESGEDVMMKKQKSHKEVMEGDGVQLSRMPSLDMDLIWDALSFPHSS
At4g39780.1	MAAIDMFNSNTDPFQEELMKALQPYTTNTDSSSPTYSNTVFGFNQTTSLGLNQLTPYQIHQIQNQLNQRRNIISPNLAPKPVPMKNMTAQKLYRGVRQRHWGKWVAEIRLPKNRTRLWLGTFDTAEEAAMAYDLAAYKLRGEFARLNFPQFRHEDGYYGGGSCFNPLHSSVDAKLQEICQSLRKTEDIDLPCSETELFPPKTEYQESEYGFLRSDENSFSDESHVESSSPESGITTFLDFSDSGFDEIGSFGLEKFPSVEIDWDAISKLSES
At4G28140.1	MDFDEELNLCITKGKNVDHSFGGEASSTSPRSMKKMKSPSRPKPYFQSSSSPYSLEAFPFSLDPTLQNQQQQLGSYVPVLEQRQDPTMQGQKQMISFSPQQQQQQQQYMAQYWSDTLNLSPRGRMMMMMSQEAVQPYIATKLYRGVRQRQWGKWVAEIRKPRSRARLWLGTFDTAEEAAMAYDRQAFKLRGHSATLNFPEHFVNKESELHDSNSSDQKEPETPQPSEVNLESKELPVIDVGREEGMAEAWYNAITSGWGPESPLWDDLDSSHQFSSESSSSSPLSCPMRPFF
At1g78080.1	MAAAMNLYTCSRSFQDSGGELMDALVPFIKSVSDSPSSSSAASASAFLHPSAFSLPPLPGYYPDSTFLTQPFSYGSDLQQTGSLIGLNNLSSSQIHQIQSQIHHPLPPTHHNNNNSFSNLLSPKPLLMKQSGVAGSCFAYGSGVPSKPTKLYRGVRQRHWGKWVAEIRLPRNRTRLWLGTFDTAEEAALAYDKAAYKLRGDFARLNFPNLRHNGSHIGGDFGEYKPLHSSVDAKLEAICKSMAETQKQDKSTKSSKKREKKVSSPDLSEKVKAEENSVSIGGSPPVTEFEESTAGSSPLSDLTFADPEEPPQWNETFSLEKYPSYEIDWDSILA
At5g65130.1	MALNMNAYVDEFMEALEPFMKVTSSSSTSNSSNPKPLTPNFIPNNDQVLPVSNQTGPIGLNQLTPTQILQIQTELHLRQNQSRRRAGSHLLTAKPTSMKKIDVATKPVKLYRGVRQRQWGKWVAEIRLPKNRTRLWLGTFETAQEAALAYDQAAHKIRGDNARLNFPDIVRQGHYKQILSPSINAKIESICNSSDLPLPQIEKQNKTEEVLSGFSKPEKEPEFGEIYGCGYSGSSPESDITLLDFSSDCVKEDESFLMGLHKYPSLEIDWDAIEKLF
At1g64380.1	MEESNDIFQNNFSPKISEIRASLSQIILAGGPNTLDSIFSLLTPSSVESATTSFNTHNPPPPPQLGSSVYLRQRDIIEKFHLQNRAISTPHPPLFSSTYDHHQTSELMLQAAAGSPAAAFAAALAAGRVTKKKKLYRGVRQRHWGKWVAEIRLPQNRMRVWLGTYDTAEAAAYAYDRAAYKLRGEYARLNFPNLKDPSELLGLGDSSKLIALKNAVDGKIQSICQRVRKERAKKSVKVSKNSSATADSSCLSSPEILSSSPVTTTTTAVTSEDSYWVSPMGLCNSENSSPVSVSVPSEVPATAEEEAMMGVDTDGFLLARMPSFDPELIWEVLAN
At1g36060.1	MADLFGGGHGGELMEALQPFYKSASTSASNPAFASSNDAFASAPNDLFSSSSYYNPHASLFPSHSTTSYPDIYSGSMTYPSSFGSDLQQPENYQSQFHYQNTITYTHQDNNTCMLNFIEPSQPGFMTQPGPSSGSVSKPAKLYRGVRQRHWGKWVAEIRLPRNRTRLWLGTFDTAEEAALAYDRAAFKLRGDSARLNFPALRYQTGSSPSDTGEYGPIQAAVDAKLEAILAEPKNQPGKTERTSRKRAKAAASSAEQPSAPQQHSGSGESDGSGSPTSDVMVQEMCQEPEMPWNENFMLGKCPSYEIDWASILS
At1G22190.1	MTTSMDFYSNKTFQQSDPFGGELMEALLPFIKSPSNDSSAFAFSLPAPISYGSDLHSFSHHLSPKPVSMKQTGTSAAKPTKLYRGVRQRHWGKWVAEIRLPRNRTRLWLGTFDTAEEAALAYDKAAYKLRGDFARLNFPDLRHNDEYQPLQSSVDAKLEAICQNLAETTQKQVRSTKKSSSRKRSSTVAVKLPEEDYSSAGSSPLLTESYGSGGSSSPLSELTFGDTEEEIQPPWNENALEKYPSYEIDWDSILQCSSLVN
