# Supplementary material for: Genome-wide analysis, identification, evolution and genomic organization of dehydration responsive element-binding (DREB) gene family in Solanum tuberosum
Source: PeerJ. 2021 Jun 24;9:e11647. doi: 10.7717/peerj.11647 (PMC8236231; doi:10.7717/peerj.11647)
Supplement: Supplemental Information 4 [file peerj-09-11647-s004.xlsx]

## Sheet: Sheet1
CDS Sequences of 66 StDREB genes
Gene name	CDS Sequences
StDREB1	ATGTTGTTACTAGCTTCGAAAATCCCAAAAAAACGTGGAGGTAGGAAGAAGTTTCGTGAAACTAGACACCCGGTTTATAGGGGAGTGAGGTGGAAGAATTTCGAAAAGTGGGTTAGTGAAGTGAGAGTACCTGGTAAAAAGTCAAGAATATGGCTTGGCACGTTTCCCAATGCAGAAATGGCAGCTAGAGCTCATGACGTGGCGGTCATGGCTCTTAAAGGCCGGTCAGCTTGTTTGAATTTTGCTGACTCGGCTTGGAGGTTGCCTGTCCCTGCTTCAGCAACCGCCAAGGATATTCAAAAGGCGGCTGCTGAAGCAACTGAGACATTTCGTGCGTCAGAATCCTTGGAGAGAGAAAACTCTGAGGAAGTTGTTGTTAATAATGATGATCATTATGTT…
StDREB2	ATGTTTCCAAGCTATTATTCGGAGCCACTCACTCAATTATCATCATCGTCATCATCAATACTATCTGATAATAGCAATCACTACTCCCCTAATAATAATTTTTCTGATGAGGAAGTTATTAATTTAGCTTCAAATAACCCGAAAAAGCCAGCTGGCAGGAAGAAGTTTCGAGAAACTCGACATCCCGTATTCAGGGGAATCAGGATGAGGAATTCCGGAAAATGGGTTTGTGAAGTTAGAGAACCAAATAAGAAATCTAGAATTTGGCTCGGCACATTCCCTACTGCTGAAATGGCGGCTAGAGCTCATGACGTGGCGGCTTTAGCATTAAGGGGCCGTTCTGCTTGCTTGAACTTTGCTGACTCTGTTTGGAGGTTGCCTATCCCTGCTTCCTCCAAC…
StDREB3	ATGGATATCTTTCGAAGCTATTATTCGGACCCACAAATAGAATCTTCTTCATCATTTTCTGATACTACTACTTATAACTCTCCTAATAGAGCCAATCATTCTGATGAGGAAGTTATTTTAGCTTCAAATAATCCAAAGAAGCCAGCTGGAAGGAAGAAGTTTCGAGAAACTCGACATCCAGTATACAGGGGAGTCAGGATGAGGAATTCAGGAAAATGGGTTTGTGAAGTCAGAGAACCAAATAAGAAAACAAGGATTTGGCTTGGTACTTTTCCAACTGCTGAAATGGCGGCTAGAGCTCATGACGTGGCGGCTATAGCATTAAGAGGCCGTTCTGCTTGTTTGAATTTTGCTGACTCTGCTTGGAGGTTGCCTACCCCGGCTTCCTCCGACACTAAG…
StDREB4	ATGTCTACAGAGCAACCAAATTGTTCAGAAAGTACTGAATCTAGCTGCAACTCTTCTTCTTCTTCGCCGCCCTCATCGCCATCTTTTGTTCTTCTTCAACCACTTCCGCAAATCAATTCGAAAAATCGACTCAAAAGATGCAGAGGAGAAGAAGAAGAAGTAAACGAAGTCGTTAATAATGCAAACCCAAATCCGAAGAAGATCAGTAAAAACAACAATGGTGGTAGTACTGATGTTTCGTATGTAGGTGTACGAATGAGAGCATGGGGTAAATGGGTATCCGAAATCCGTGAACCTAAAAAGAAATCACGGATTTGGTTGGGTACCTTCGCTACCCCGGAAATGGCGGCGCGTGCTCACGACGTAGCCGCCATGTCCATTAAAGGAACCTCAGCAATA…
StDREB5	ATGAATGATAATAACTTTAGAGATCACTACTTGCACGAAACATCAACATCTTCAGGAGGAGTTCAAGATGAAGGAATATTTCTACTAGCTTCGAGTCAACCTAAGAAACGTGCAGGGAGAAAGAAGTTCAAGGAAACTCGCCACCCAATTTATAGGGGAGTGAGAAGGAGGGATAATAATAAGTGGGTTTGCGAGGTACGTGAGCCTATTGAGCAAAAAAGAATATGGCTAGGAACTTACCCTACTCCTGAAATGGCAGCTCGAGCTCATGATGTAGCTGCATTAGCACTTAGAGGTAATCTAGCCACTTTAAATTTCGCCGACTCTAGTTGGCGGTTGGCGGTGCCGGTATCAAAGGATCCCGAAGAATTACGCCAGGCCGCTATGAAAGCAGCCGAA…
StDREB6	ATGAATATCTTTGAAACCTATTATTCAGACCCACTAATTTTAACCGAATCTTCTTCTTCTTCTTCATCATCATCTGACGAGGAAATTATTTTAGCTTCGAATAACCCAAAAAGGCCAGCTGGAAGGAAGAAGTTTCGAGAAACTCGACATCCGATATACAGGGGAATCAGGATGAGGAATTCAGGAAAATGGGTTTGTGAAGTCAGAGAACCAAATAAGAAATCAAGGATTTGGCTTGGTACTTTTCCTACTGCTGAAATGGCGGCTAGAGCTCATGACGTGGCAGCTTTAGCATTAAGAGGCCGTTCTGCTTGCTTGAATTTCGCTGATTCTGCTTGGAGGTTGCCTATCCCTGCTTCCTCCAACTCTAAAGATATTCAAAAGGCGGCCGCTGAGGCC…
StDREB7	ATGGCGGAATGTGTAGAATCAAAGAAATCAATAGTTGGACGTTCGAGAAAAGGTTGCATGAGAGGTAAAGGCGGTCCAGAAAACGCGTTGTGCACATATAGAGGAGTGAGACAAAGAACATGGGGCAAATGGGTAGCTGAAATAAGAGAACCAAATCGTGGAGCACGAATTTGGTTAGGCACTTTCAATACATCAGTCGAAGCAGCCAGAGCCTATGATGACGCAGCACGCCGGCTTTATGGTTCTGATGCGAAGCTCAATCTCTCAGAAGAAGAAGAATCAATAATTTCTTCGGACACAGAAATTAGTTGCATGGAAAACAACATAATCGAGGAATGTTCTGTACTTGAGGAAGCATCCATATTTAAAGATGGAAACGGGGAGTATTTGGTGTGGGAT…
StDREB8	ATGCCAGGCAAAGGCGGTCCTGAGAATTCGAGTTGTAAATACAGAGGAGTTAGGCAGAGGACTTGGGGTAAATGGGTGGCTGAAATTCGCGAGCCTGTTTATATTAGTGGTGAGTATAAGAACAGAGGAAAGCGACTTTGGCTAGGTTCTTTTGCTACTGCTGATGAGGCTGCTATTGCTTATGATGAAGCTGCTAAGGTTATGTATGGATCCAATGCCACACTTAACTTCCCCAATTATTGTGGATCGTCGAGTAATGATACATCTTCACTTGAATCGAGTGGTCAATCGTCTGTTGATCATGAAGATTTAGTGGTTGATGATGCAGAGAAGATTGAAATTGAGTCGGATTTGTAA
StDREB9	ATGGCTATTATGGATCAAGCTGCTAATATGGCTACTCTGCCGTTGGATTATAGTGGAAAGAGGAAATCAAGGAGTAGAAGGGACAGAACAAAGAATGTGGAAGAGAGACTAGCTAAATGGAAAGAGTATAATGAGAAACTAGATAGTGTTGATGATGAAGGGAAGCCAGTGCGTAAAGTTCCTGCTAAAGGTTCAAAGAAGGGGTGTATGAGAGGTAAAGGGGGACCCGAAAATTCGCGGTGTAAATACAGAGGTGTTAGACAGAGGATATGGGGTAAATGGGTTGCTGAGATTAGGGAACCTAAAAGAGGTAGTAGGCTATGGTTGGGTACATTTGGTACAGCAATTGAAGCTGCTCTAGCATATGATGAAGCAGCAAGAGCTATGTATGGTCCTTGT…
StDREB10	ATGTCAACAACCTCCAAGAAGTTGATCCCAGCTACATCCCGCAAGGGATGTATGCGTGGTAAAGGTGGCCCCGAGAATGCAAGTTGCACGTACAAAGGTGTACGGCAACGCACCTGGGGCAAATGGGTAGCCGAGATCCGCGAACCCAATCGCGGAGCTCGGCTTTGGCTCGGCACCTTTGATAATTCTTATGACGCTGCTGTCGTCTATGACGCTGCAGCCCTTAAGCTTTATGGTGCCGAAGCCAAACTCAATTTGCCCCATCTGTACAGCATTCCGGCCCAGGATCAGTCCCAGGCCCAGTCCCAAATCCAAAACTCTAGGCCCATTACTATCATGAGCCCATCTCTAGCTCCCGTTTCAGCTACTGCTCCAGCTTCAGTTCCTGCTCCGCCTGTA…
StDREB11	ATGGAAGAAAAAGATGAATCTCCCATTATTTTCAACAACAATCAAACAATCCCTTCTTCATCTCTAACAAAAAGATCAATAACCTTAAAACCATCAAAACAACAAAGCAATCACAACAAGAAAATCAAATCCAGTACAGAAAAAACCAAGAAAATTGATGACTCAAAACACCCAATTTACCACGGTGTTCGAAAACGGAGCTGGGGTAAATGGGTGTCTGAAATTCGCGAACCGAGGAAAAAATCAAGAATTTGGCTTGGTACTTTTTCTACTGCTGAAATGGCTGCCAGAGCACATGATGTAGCTGCAATTGCCATTAAAGGTGACTTAGCTTTACTCAATTTCCCTGAATTAGCTCATCAGTTTCCTAAACCAGCTTCGAAATGCGCTAAAGATATT…
StDREB12	ATGATGGAAGGAGAAAAGAGAAAGCAGAGGGAACACCAACAAGATAAGCCATACAGAGGAATACGGATGAGGAAGTGGGGTAAATGGGTAGCTGAAATTCGAGAACCAAACAAACGGTCTCGAATTTGGCTTGGTTCTTATTCTTCCCCTGTTGCTGCTGCTCGTGCTTACGATACCGCTGTATTTTACTTGCGAGGTCCTTCAGCTAGGCTTAATTTCCCTGAATTCATAGTTGATGACCATGAAAATCACGATCTATCAGCTGCTTCTATTAGGAAGAAAGCTACTGAGGTAGGTGCTAGAGTTGATGCTCTTCAAACTGCGATTCATAATTCTACTGCTATTCCTCCTGAATCCAATTCTAAATCCACAAGGATGATGATGAAGCCTGATTTGAAT…
StDREB13	ATGGATTTTTGTGTTGACAGGAAACTGAAAAGAAGGCGTAATGGATCTGATTCCATAGATGAGATTTTATTAAGATGGAGAAATTTTAATAAGGAGGTTAATTCAAACAATGAACAAGTGAAGAAGAAGAAGAAGAGAAAATCTCCGGGTAATGGATCAAACAAAGGTTGTATGCCAGGCAAAGGCGGTCCTGAGAATTCTGGTTGTAAATACAGAGGAGTTAGGCAGAGGACTTGGGGTAAATGGGTGGCTGAAATTCGCGAACCTGTTTATATTAGTGCTGCTAAGGTTATGTATGGATCCAATGCCATACTTAATTTCCCCAATTGTTGTGACAGGTCGAGTAATACTCGAACATCTTCACTTGAATCGAGTGTTCAATCGTCTATTGATCATGAA…
StDREB14	ATGAATGATTCGAGTAACTCATGTTCTTCGAATAGAACGGAACGTTCGGATGAAGAAAATATTTTATTAGTATCATCTAACAAGCCGAAGAAGCGAGCGGCCGGGAGGAAGAAGTTCAAGGAAACACGTCACCCGGTGTTTCGAGGAGTGAGAAAGAGGAACAACGACAAGTGGGTTTGCGAAATTCGCGAACCCACTAAACAAAAGCAAATATGGCTAGGTACGTACCCAACCGCGGAAATGGCTGCACGTGCTCATGATGTGGCTGCATTAGCGCTTAAAGGAGAGTTAGCCACACTGAATTTCGCGGACTCCGCTTGGCGTTTACCGGTTCCGGTATCTAAGGACCCGAAAGAGCTCCGCCAAGCGGCTGCTAGAGCAGCTGAGGCGTTCGAACCG…
StDREB15	ATGGACAGCTACAAAAGAAATCCACTAAAACCATGGAAGAAGGGCCCGGCAAGAGGGAAAGGGGGCCCGCAGAACGCGTTATGTGAATACCGCGGCGTTCGACAGAGAACATGGGGGAAATGGGTAGCAGAAATCAGAGAGCCTAAAAAGAGAACTAGGCTATGGTTAGGATCTTTTGCTACAGCTGAAGAAGCTGCAATGGCTTATGATGAAGCAGCAAGAAGATTATATGGACCAGATGCTTACCTTAATTTACCTCATATGAGAGCTAATTTCAATCCATTGAACAAATCACAAAAGTTCAAATGGTTTTCATCAACCAACAACTTTGTTTCATCATTAATCCCAAATACCACTGGCTTACTCAACTTAAGTGCTCAGCCAAATGTTCATGTAATT…
StDREB16	ATGGAGCAAGTAAAATCACCACCATCCTCCCGGGCAATAACAAATTGCCGGGGAGGGGGTGGGGGAAGTAGTACGAGACACCCTATTTATCGTGGTGTCCGTAGACGAAGATGGGGAAAATGGGTGTCCGAAATTCGAGAGCCAAAAAAAAAATCGCGAATTTGGTTAGGTTCTTTTATTTCACCCGAAACGGCAGCTCGAGCTTATGACGTGGCGGCTTATTGCCTCAAGGGAAGTAAAGCGGAGCTGAATTTTCCAGATGAAATAGAGCGATTACCGCGGCCAATAAGTTCCGGGGCAAGAGATATTCAGGCAGCAGCGACGATGGCAGCGAATATGGGGATTGTGAAGGGAAAAAATGATGAAGATCGTTGTTGTAGCGATGATTTTTGGGAAGAA…
StDREB17	ATGAATTCAGTAGCAGCTCAAGATAATAATGAAATTATTAGTAACAACAAGTCGATAAAGAGGAATCGCGATAGCAGCAAGCATCCAGTTTTTAGAGGAGTTCGAATGAGGAATTGGGGAAAATGGGTGTCAGAAATTCGCGAGCCACGTAAGAAATCACGTATTTGGCTTGGGACTTTTCCAAATCCAGAAATGGCAGCTAGAGCTCATGACGTGGCAGCGTTAAGCATAAAAGGTAATTCAGCTATACTCAACTTTCCTGAACTAGCTGGTTTGCTTCCTAGACCGGCTACACTTAGCCCGCGTGACATTCAAGCAGCCGCAGCAAAAGCCGCAGCTATGGACAAGTTTGATAATAATAATGGTATTACTTCGCCGAATAATTCAATTTCATCAAAT…
StDREB18	ATGGATTTTGAAGATGCACTAACTTCTTCTTCTTCATCTTCTTCTGATCATGATAATAAAGAAAAAAACATTGATCTTTCATCGTGTTCGACGAATAATAATAATGTACAATTCAAGAGGAGGGCAGGGAGGAAAAAGTTCAAGGAGACTCGACATCCATTATATAGAGGAGTTAGGAGAAGAAATGGAGAAAAATGGGTGTGTGAAATACGCGAGCCAAATAAAAAAACAAGAATTTGGTTAGGTACTTTCTCTACTCCTGAAATAGCAGCTAGGGCACACGATGTTGCTGCCCTAGCTCTCCGGGGAAGTAATGCTCTTCTTAACTTCCCCGGATCCGCTTGGTCTCTACCTAAAGCTAAATCTTCTTCTCCTCAAGACATTCAAATCGCGGTTCTC…
StDREB19	ATGTCAAGTTCTGGGGAAAATAACGGATCAGGACGACACCCGGTATACAAAGGGATAAGAAGAAGGAAAAGTAGCGGAAAATGGGTGTCAGAAATTCGGGAACCGCGGTCTCCTAATCGGATTTGGCTCGGTACATTCCCGACCCCGGAAATGGCTGCGGTCGCTTATGACGTGGCAGCACTTGCACTCAAGGGTCGGGATGCCGAGCTTAATTTTCCAAACTCGGCCCCCTCGTTGCCTGTCCCGGCTACTAACTCACCCCGGGATATCCAGACTGCTGCAGCCTGTGCGGCCGCAGCACTCGGGGCAGCCGGGGATGCGTTAGTAGGGGGGAGGAGTAGTAGTAATAGTAATAGCAGAGCGGTTTCAAGAGAAGTGGAGGATAATTATTTGATGCCT…
StDREB20	ATGGAAGGAAAAAAAAAGAAGAAGAGAAATGGAGAGGAAGTATTATATAGAGGTGTACGTATGAGAAATTGGGGAAAATGGGTATCCGAAATTCGCGAGCCTCGTAAAAAATCTCGTATTTGGCTTGGTACGTTTTCTTCGCCTGAAATGGCAGCTCGAGCTCATGATGTAGCCGCTTTATCTATCAAAGGTACTGCTGCAATCCTCAACTTTCCAAAACTTGCAAGTTATCTTCCAAGACCTGCTTCACTAAGCCCTCGCGATATTCAAGCAGCAGCAACAAAAGCAGCTTCTATGAAAAACTTCGATTCTTTATTATCATCGTCTTCTTCTTCTTCCTCTTCATTATCAGTAGCAACGACCAATTTGGGGACAATGTCAGAAGAATTGACCCAAATC…
StDREB21	ATGGCTGACTCTCAAAATTCTACCAAGTCCAACCAAGTAATTCAACCTCCTCATCAATCTAGTGAAAGTACTAAAACACCCTTCAACCCTACCCCTCCTCCACCAATACCACCGCCACCGGCACCGCCGCCACCCCCAGAGACACACATTCAAACAACCAATACATTATTATCAAAATTCGAAAACACAAATTCAACTCCAAAAACAGTTCAACTACCAAATATTATCCCAGCTACAATCATGAGTTCCACCTCATCGGGCAGTTCGGGATCTCCGAGCCGCCCGATAGGGGGAAAACACGCAGTATTCCGCGGAATACGATGTAGGAGTGGGAAATGGGTGTCCGAAATTCGAGAGCCACGTAAGACTACGAGAATATGGTTAGGTACTTACCCTACA…
StDREB22	ATGAAAGTTCAACTTGAAAAATCAAATAGCTTAGATTCTTCTTCTTCATCCTCGTCCTCATCCTCCTTTAACGAGGGCAACATTAACACAAAGATCCTAAAAGAGTACGAATCGAATAAAGTTGAAGAATTCAATAGGGACGACAATGAGAACAAGAGGAGGAAAAAAGTTATTCAGGACGATCATGATGACAAGCATCCAACCTATAGAGGAGTTCGTAAGAGGAATTGGGGAAAATGGGTGTCAGAAATCCGAGAGCCAAGGAAGAAATCAAGAATATGGTTAGGAACTTATTTGACAGCTGAAATGGCTGCTCGAGCTCATGATGTTGCGGCTTTAGCCATTAAAGGTCACTCGGCTTACCTTAATTTCCCTTATTTAGCTGATCAACTCCCACGT…
StDREB23	ATGAATAACAACTCTAGTTTGTACTCGTCAGATCTCAACCCACTAAGTGCAACAACACCTTCCGATGAGGAAGGATTAATACTATTATTAGCTTCAAGCCGGCCCAAGAAACGGGCCGGAAGGAAGAAGTTCAAGGAAACTCGCCACCCAGTTTATAGGGGAGTGAGGAGGAGGAATAACAACAAGTGGGTTTGCGAGCTACGTGAGCCTAGTCAACAAAAAAGAATATGGCTAGGGACTTACCCTACTCCTGAAATGGCGGCTCGAGCTCACGATGTTGCTGCATTAGCACTTAGAGGTAATCTAGCCACTCTGAACTTTGCTGACTCTCGTTGGCGGTTACCAGTGCCAGCATCAAAGGACCCCAAGGACATACGCCAAGCAGCCGTTATAGCCGCA…
StDREB24	ATGGAAAATCAAGAAGAAATAATCAACCTCGAAAATCGTCATGATTTCATCTGTAATGGCTTGAATTCTCCTTCAAACACCGCGACATCATCATCATCATTTTCGAGAAAAATTGAAGAAGAGAAAAAGAAAAAAAAAAGAAATGATGATGACAATAAGCACCCAACCTATAGAGGGGTACGTAAGAGGAGTTGGGGCAAATGGGTGTCCGAAATTCGAGAACCAAAAAAGAAATCAAGAATATGGTTAGGTACTTATCCAACAGCTCAAATGGCAGCTCGAGCTCATGATGTTGCGGCTTTAGCCATCAAGGGATGTTCGGCTCACCTTAATTTTCCTCATTTGGTTGATCAATACCCGCGTCCGGCATCCACTTGTCATAAGGATATCCAAGCAGCA…
StDREB25	ATGGAGGTTGACGGCGTCAGAAGCGGCGATGCTGGGGTGGTTGGAGGCGGAGGAGGAGGAGGAGGAGGGTGTTGCTCCGGGAAGAGAAAAAACGAGAGGGCTTACAAAGGAATAAGGATGAGAAAATGGGGGAAATGGGTTGCTGAAATCCGAGAGCCAAATAAACGGTCGAGGATATGGTTGGGCTCGTATACGACGCCTGTTGCAGCTGCAAGAGCATACGATACAGCTGTTTACTATCTCCGGGGGCCATCGGCCCGGTTAAATTTCCCGGAGCTGTTAGTCGGTGATAGCGGCGAACTCAGTGATTTGTCTGCTGATGCAATTCGTAAGAAGGCTGTTGAAGTAGGTGCTAGAGTTGACGCTATCCAGAGTTCAATGGCTATTTCCGATGATGAC…
StDREB26	ATGGGCGGTATAACATCAGAATATAGAGGTGTTAGAAAGAGGAAATGGGGTAAATGGGTGTCCGAAATCCGTGAGCCAGGAAAGAAAACGAGGATATGGCTAGGGAGTTTTGAGACAGCAGAGATGGCGGCGGCTGCATATGATTCAGCTGCATTTCACCTCAGGGGACATGCAGCTAAGTTAAATTTCCCAGAGTTGATTGGACATTTCCCTAAACCAGCAAGTTCTTCCCCTGAAGATATACGTTTGGCTGCACAACAGGCTGCAATTACAGTTCAAAACACAAATATCATGGCCTCTACTAGTCATGGCCATGAAGCACCAGTTACAGTAGGACTATCTCCAACTCAAATTCAAGCTATTAATGACTTTCCTATGGATTCACCAAATATGTGGACT…
StDREB27	ATGGCGGAAGTTGAAGTACAAATTTCAGAAACAGAGAGCTCTTCTAATACTAATACCTCTGTTTCTTCTTCTTCGTCTTCGTTGTCCGCTGATTCCATGCACAAATCGGTTTTTGATTCGTCAAACAAATTACCGAAAGGGAAGAAACGGCCGACGAAGAAACAGAAGGCTATTACTAATAGTGAGAGTAGACATCAAATTTACAGAGGAGTTAGGATGAGAAGTTGGGGGAAATGGGTATCTGAAATTCGTGAACCGAGGAAGAAATCACGTATTTGGCTCGGTACTTATCCTACAGCAGAAATGGCCGCTAGGGCACATGATGTTGCAGCGGTGAGTATAAAAGGAAAATCCGCCATTCTCAATTTCCCTCATCTAATCGACTCGTTGCCTCGTCCA…
StDREB28	ATGGAAGAAAAAGATGAATCTCCCATTATTTTCAACAACAATCAAACAACTTCTTCTTCATCTCTAACAAAAAGACCAATAACCTTAAAATCATCAAATCAAGAAACCAATCACAACAAGAAAATCAAATCCAGTACTGAAAAAACCAAGAAAATTGATGACTCAAAACACCCAATTTACCACGGTGTTCGAAAACGGAGCTGGGGAAAATGGGTGTCTGAAATTCGCGAGCCGAGGAAAAAATCTAGAATTTGGCTTGGTACTTTTTCTACTGCTGAAATGGCTGCCAGAGCACATGATGTAGCTGCAATTGCCATTAAGGGTCACTTAGCTTTACTCAATTTCCCTGAATTAGCTCATCAATTTCCTAAACCATCTTCGAAATGCGCTAAAGATATT…
StDREB29	ATGGCTGTGCTTGATCAAACATCAAATATGATGTTACCTATGGATTATACAAGAAAGAAGAAATCAAGGAGTAGAAAAGATGCTCCAAAGAATGTAGCAGACACACTTGCGAAGTGGAAAGAGGTGAATGAGAAATTAGACGCGTGTGATGATGATGGAAGAAAGCCAGTACGTAAAGTTCCGGCTAAAGGATCAAAGAAGGGATGTATGAAAGGTAAAGGAGGACCGGATAACGGGCGGTGCAAGTATAGAGGTGTTAGGCAGAGGACATGGGGTAAATGGGTTGCTGAGATTAGGGAGCCACATAGAGGGAGAAGGCTTTGGTTGGGTACATTTGACACAGCAATTGAGGCTGCTCTTGCTTATGATGAAGCTGCAAGGGCAATGTATGGTCCTTGT…
StDREB30	ATGGCAGCTATGGATTTTTGGAATAGTACATCTGTAGATTTTCAATCATCATCAGAACCTATTACTTCTGGTGGTGAATTAATGGAAGCTCTTGAACCTTTTATGAAAAGTGCTTCTTCTTCTCCTTCTCCTCCCCCTTCTACTTTTCCTCCTGTTTTCCCTTCTTCTTCTTCTTCAACTTTTCCTTCTTCAGATTTCCAATCTTATCCTTCATTTCCTCCTCCAACTCCTACCCTTTCATATCCCTACACTTCTTCTTTTTACCCATCTTCTCAATCTACTATGAGCTCTGAGGTTTGTTCCACTTCCACAGAGATGAATTCCCAAATCTTTTCAACTCGGTTTTCTGGGTATGGAATGGAGCAACAGGGTTCAATTGGGTTGAATCAGTTAACCCCA…
StDREB31	ATGGATTTTTATGTTAACAGGAAACTGAAAAGAAGGCGTAATGGATCTGATTCCATAGATGAGATTTTATTAAGATGGAGAAATTTTAATCCGGAGGTTAATTCGAACAATGAACAAGTGAAGAAGAAGAAGAGAAAATCTCCGGGTAATGGATCAAACAAAGGTTGTATGCCAGGCAAAGGCGGTCCTGAGAATTCGGGTTGTAAATACAGAGGAGTAAGGCAGAGGACTTGGGGTAAATGGGTGGCTGAAATTCGCGAACCTGTTTATATTAGTGGTGAGTTTAAGAGCAAAGGGAAGCGGCTTTGGCTCGGTACTTACTCGACTGCTGGTGACGCTGCTATTGCTTATGATGAAGCTGCTAAGGTTATGTATGGATCCAATGCCATACTTAATTTC…
StDREB32	ATGGAAGATGATCAAGAAAGTAAGAATAATATCGACATGTATAGAGGAGTAAGGAAGAGAAAATGGGGGAAATGGGTGTCTGAGATACGCGAACCAGGAAAGAAAACTCGAATATGGTTGGGGAGCTATGAGACAGCAGAAATGGCTGCTGCAGCTTATGATGTTGCTGCATTTCATCTAAAAGGTGAGAGACCAAACTTAAGGCTCAATTTCCCTGAATTAATACATACATTCCCAAAACCCTCAAGTTCAAGACCTGAAGATGTACAAATGGCAGCTCATGAAGCGGCAATGAGGTTCAAACGGCCAATTGATGATCATCCAGACAACTGTGGTGCAGGCCCGGTGAGAGTAGGTCTCTCACCTAGTCAAATTCAGGCGATTAATGAATCCCCGTTG…
StDREB33	ATGGAGATAGGTGGTGGGGGTCAAAGTGGAGTTGCTGCAAGTTCAGGGGTTTGTTGTGGTGGGAAGAGAAAGAACGAAAGGCCATACAAAGGGATTCGTATGAGGAAGTGGGGAAAATGGGTGGCAGAAATTAGAGAACCCAACAAGCGTTCGAGGATCTGGTTGGGTTCGTATTCAACGCCGGTGGCGGCGGCGCGGGCTTATGATACGGCGGTGTATTATCTAAGAGGGCCTTCGGCCCGATTGAATTTTCCTGAGTTGTTAGTTGGTGATGGTGGGCTTAATGATTTGTCTGCTGCTTCAATTCGTAAAAAAGCCATAGAAGTTGGTGCTCAAGTTGATGCTGTACAGAACTCGCTTGCAACCCATCATAACCATACAGAAGAAAAGGTGCACTGT…
StDREB34	ATGACTGACCCTTCACATGCTACAAAGTCAAGAACAAATACCAAACATCCTATATACCGTGGTATACGATGTAGAAGTGGGAAATGGGTGTGTGAAATTAGAGAGCCACGTAAGACAACAAGAATATGGTTAGGCACTTACCCTACACCACAAATGGCTGCTGCTGCCTATGATGTTGCTGCCTTAGCTCTTAAGGGAACTCAAAATGTTGTACTCAATTTTCCTCATCTTGTTGATTCATATCCAAAGCTCCCTCCCTCACCATCTCCGGCCGATATACAACGTGCCGCGGCCACAGCGGCTGGGGCAATGGCCTCGCTAGGCGACGATGATGATCGGTCATTGGAAAGTAGGGATGGGGCTATATGTAACGAAAGGGGTTCAACTGAATTTCCTTCA…
StDREB35	ATGGTGAAACCCAATTCAAAAGATACTGAATTTTCACCTTCATCGTCATCGTCATCTTTGTATCGGGGAGTAAGGAAGAGGAAATGGGGGAAATGGGTATCGGAAATTAGATTACCTAATAGTAGAGAAAGAATTTGGTTGGGTTCTTATGATACGCCGGAAAAAGCTGCTAAAGCATTCGACGCCGCACTTTTTTGTTTGCGGGGTAAAGGGGCTAATTTCAATTTCCCGGAAAATCCACCGGAGATTATGAACGGAAGGTCGATGACTCCGTCGGAGATTCAATCGGCGGCGGCACAGTTTGCGAATAATACAGAACCCGAGCTTATCCGGGTCGGACCGAGGGAGAATTCGGATCTTTCTTCTTCCTCATCGGAAATATTCCTGGCGGAATCGCCG…
StDREB36	ATGGCGGAACTTGTACAATCATCTCCCATTTCCGTGTCAAAAACAGAGGAACCAGAAGAGAAAGAGAAAGAGAAACGAATGGAAAAACGAAGAAGAGATGAATCTTACCCAGTATACAGAGGAGTTCGAATGCGAAGTTGGGGAAAATGGGTTTCTGAAATTCGACAACCGCGTAAGAAATCACGGATTTGGCTAGGTACTTATCCAACCCCTGAAATGGCTGCAAGAGCACATGACGTTGCTGCGCTTAGTATTAAAGGGAATTCAGCAATTCTCAATTTTCCTCAACTCGTTGAATCGTTGCCTCGTCCAGCTTCAATTTCACCTAGAGATGTTCAAGCTGCTGCTGCTAAAGCAGCTGCTATGGATGAACTAAATTCCTCTGTTTCTTCTTCTTCG…
StDREB37	ATGGTGCGGCCTAAAGTAAGCAAAGAGAAAAAAGTGAAAGGGGATCGTTACAAGGGTGTGCGTATGAGAAAATGGGGAAAATGGGTAGCTGAAGTACGGCAACCGAAAAGCCGTGACAGAATATGGTTAGGCTCTTACGATACGGCGGAAGAAGCGGCTAGAGCTTATGATGCAGCGGTGGTTTGCTTGCGTGGATCGTCCGCGATGATTAATTTCCCGGACGATCCACCGGTTATTTCGTGTGATGGTGATCATAAGTTGTTGTCACCTTCGGAAATTCAAGTTGAGGCATCGAGACATGCACGTAGTACTAGAGAAGAGTCTGCTGCAGCTGCTGATGATGCCGTAGACCACGGCAGATCAGCAGCTGTGGAGAGTGTGTTTTTTAGAGATGATTTG…
StDREB38	ATGGTGAAGACAGAGCAAAAAAGTTTAGTAGAGCCAAACAAGAAATCAATGTCAATATCATCATCATCTTCTTCAACATCAAGCAATATCAATAACATGAAGATGAAGAAGAATAAGTACAAAGGAGTTAGAATGAGAAGCTGGGGATCATGGGTATCAGAAATAAGAGCACCAAATCAAAAAACAAGAATCTGGTTAGGTTCCTATTCTACCCCTGAAGCTGCTGCTAGAGCTTATGATGCTGCACTTTTATGCCTAAAAGGCCCTTCTGCTTCTTCAAATCTCAACTTTCCTTTTGACTCTTCTTTCTATCACCACATTGATCATCACACTTCTACAACACTCTCTCCTAAAGCCATTCAGAGAGTGGCCGCGGCAGCCGCGGCCACTCCTGAACAA…
StDREB39	ATGGCTAGAGCACAACAAAGATATAGAGGAGTTCGACAGAGACATTGGGGTTCTTGGGTCTCCGAAATTCGCCATCCATTACTGAAGACAAGACTTTGGTTAGGCACATTTGAGACAGCAGAAGATGCAGCAAGAGCTTATGATGAAGCAGCAAGGCTTATGTGTGGTCCAAGAGCTAGAACCAATTTCCCCTACAACCCAAACATGCCACAAACATCTTCCTCTAAGCTTCTCTCAACTACATTAACAGCCAAGTTACACAAATGCTACATGGCTTCACTTCAAATGACCAAAACCTCACCACAAGAACAAAAAATAGCAAAAAATGCAACCAATGTTCAAGAAAGTGTTATTAATTCCTATAAAATGAAACAACAAATGTTGGTACCAAAGCCATCA…
StDREB40	ATGTCTCGACCACAACAAAGATATCGAGGTGTTCGCCAGCGGCATTGGGGATCTTGGGTTTCCGAAATTCGTCATCCTTCATTGAAGACAAGGATATGGCTAGGAACATTTGAGACATCAGAGGATGCTGCGAGGGCATATGATGAAGCAGCAAGACTCATGTGTGGTTCAACAGCACGGACTAATTTCCCTTACAATGCCACAGAGTCGACACGGTTTCTGTCTTCTGCTTTGATAGCTAAACTTCAAAAATGCCACATGACATCTCTCACTGCTACGTCAAAAAGACCTGGAAAGACAAAATTGGAAGATAAAAAAGAGAAGGAGATATCCACGAACAGGGGAGATGGAGAAGAAAGGCAGAGTGAGAGTGCATCACAACAGTACATGAAGGCACTG…
StDREB41	ATGGCAGCAGCTATAGATATATACAGCAGCAGTAACTTCTCAGATCCTTTAACAGAAGAACTTATGAAAGCACTTGAACCTTTTATGAAAGGTGCTTCTTGTTCTTCTTTTTCTTCATCTTCACCTTCTTCTTCTTCTTCTTCTTCTTTCTATACTTTTGGTGAGCCTAATTTGTATACTGATTTCTGTGCAATCCCATCAACGGCTACCCAAATGTTTTCTCAAGGGTATTCGTGTTTTAACAATATGGGTGTAGCTGAAACAGGTTCAATTGGGCTTAACCATCTAACCCCTTCTCAGATATTGCAAATCCAAGCTCAGATCCAATTCCAGAATCAACAGCAACTACTACAACTGCATCAACAACAACAGAGCTTAGGTTTGTTAACACCTACTTCA…
StDREB42	ATGGAAAATATTGAATCGATTGATAATGTTCAATCCATTATGTCAATGTATAGACCTTTAAAAAAGCTCAAAATTAACCCATCATCACAACATAATAGCCTTCGATCAAGTGGAGACGGGGTGGAGCCTGTAGCTCAGAGGATTAGAGCACGTGGCTACGAACCACAGTTTCGTTTTCCTTTTGCTCTAGATGATCCTCCATCAAGTAATTGTCACCTTAATTGGCAATCACTTACTCAAAATCAAACTATGATTTCTTTTGCACCTCAAAGTTGCTTTAATCAGTGTCGAATCACTGACAATGGGACGAGGACGACTACAATGATGAATGTTTATGGCACTGTCTCCTCCCCTGTACCTAAACAGTACAGGGGAGTGAGACAACGCCACTGGGGGAAA…
StDREB43	ATGTCAATGTATAGACCTTTGAAAAAGCTCAAAATTAGCCCATCATCACAACATAATAACCTTAGATCAAGTGGAGACGGGGTGGAGCCTGTAGCTCAGAGGATTAGAGCACATGGCTACGAATCACAGTTTCCTTTTCCTTTTGCTCTAGATGATCCTCCATCAAGTAATTGTCACATTAATTGGCAATCACTTACTCAAAACCAAACTATGATTTCTTTTGCACCTCAAAGTTGCTTTAATCAGTGTCGAATCACTAACAGTGGGACGAGGACGACTACGATGATGAATGTTTATGGCACTGTCTCCTCCCCTGCACCTAAACGGTACAGGGGAGTGAGACAACGCCACTGGGGGAAATGGGTAGCAGAGATTCGCCTTCCTCGTGAAAGAACTAGA…
StDREB44	ATGGCAACTTCTACAAAGGATTTTTGGACTACTACTCTTTTAGATCTTAACTCATCAAATTCTGGTGGTGAGCTTATGGAAGCACTTGCACCTTTTATTAAAAGTGCTTCTTCTCCTTCTCCTTCTCCTTCTGTTTCTCCATACTTTGATTTACAATCTTCTTCTCTATCAACTTCATATCTTTACGAATCATTTTCTTCAACGAGTCAACCTAATATGAGCTACTATGATAATGGTTGCTCCACTTCCAGCACGATAACCCCTACTTTTTCACAGGGGTTTTCGGGCATTATGGAAGCGGAGCAACCAGGCTCAATTTGGCTGAACCAAGCCCAAATCTATCTGCCACAGCAAATTATGCCAGCTGTCACTTTCCAGAATAATAATCAGTATGTTTCT…
StDREB45	ATGTCTTCATCAATAGGTCATGAGAGCCAAATTCATTATCAAGAGGCTGCAACTACAAATCCAACAAATTGGCTGAAAATGAATCAAACCATAACAAATTGTACCACAACAAAAGGTTTTAGTGACTATTGGCTTAGCACTACAAAAACTCAACCAATGAAATTCAAAGGATCATCAAGAAAATCATCACTTATTCATTATGAAAATTCGCCTTCATCTTCTTCTTCTTCTCCTTCTTCTATGACCGCGTCCCAAGGGAAGCTTTTTCGAGGAGTAAGACAAAGGCATTGGGGAAAATGGGTGGCGGAAATAAGGCTACCAAGAAATAGGACAAGGGTTTGGTTAGGTACATTCGATACTGCTGAAGAAGCTGCTTTTGCTTATGATACCGCGGCTTAT…
StDREB46	ATGGAAGATCATAATGAATTCTCCATCTCTAGTTCTACTACAACTTCATCATTTACAAGTTGTTGTTCTAATAACAATTGTTTAAGTTCTACTTCAACTTCTTCTACTTCATCTAATTGTTTCCATGAGAGCATTGCAAAAACCTCACCAAATGATCATTACAAGTGCAAATCCAAGAAAAGTTCAAAAAAAATTCAAGATGGGAATGAGGAGGAGGATGATAACAAGAAAATCAGACGAAAAAATGAAGGTGTTGTTGATGAAAAACATCCGACTTATAGAGGAGTTCGTAAGAGGAATTGGGGAAAATGGGTGTCCGAAATTAGACAACCAAGGAAAAAATCAAGAATTTGGCTAGGGACTTATCCCACAGCTGAAATGGCAGCTCGAGCTCATGAT…
StDREB47	ATGGCGGAACCAGAGGAACAAATGGAATTTGATGATAATACTTTTGAAAGACAACAAAGGAGGCCAGTTTTTGAAGAAGCTTCCATGTCTAATAGGCGTTTCAAAAAGATCAAAAGTCCGGAACGCCAATCCTCTGTTCAGCAGCCGTCTTTAAATTCATTTGTTCCTTGTAATAATCCAACATCAATGCCATTTCCTCCACCTCCGTCATCGTCAAGGCTTGTTTTTCCTTTTGCCTTTGATGGGACACAGCAATCCATGGATAGTTCATCCCAATTGGGAACGAACGCGATGCCTCTGTTTCATCCACAGCAGCAAAATCAGCAGCAAATGATCTCATTTTCGCCTCAACAATGTCTTTACCCTCCGTATTTTGCAGGGGATTTGGGTCCATCACAG…
StDREB48	ATGGCTGATTATCATTTTAACGTTTCCCCAAATGACAATTCTCCTCCTTTAGAAAATCTTTCACCCACTGGGGGCACCTTATTATCACCTCGTAGGCATCCGAATTTCAGAGGAATTCGACAGAGGAATGGGAAATGGGTCTCCGAAATTCGTGAGCCTCGAAAGACTACACGTATATGGTTAGGAACTTTCCCCAATCCCGAAATGGCAGCTGTCGCTTATGACGTTGCAGCTTTGGCATTAAAAGGCCCTGATGCCCAATTAAACTTTCCTGATTGTGCATACTCGTACCCTATCCCTGCTTCTCTGTCAGCCGCAGATATTCGTGCTGCGGCTGCAAATGCTGCTGCTGCTAGAGCACCTCCTTTGTCAGAATTCAGTACAGCTGGAGGTACTGCA…
StDREB49	ATGGACAGAAATCAAGAAAACAACTCTATGACTACCATATTTGATGAGGCTGCTAGAATTCGATCTTCGTTATCTCAACTAATTCTAACAAGTGGTACAAACACATTCGATACGATTTTTTCTCATTGCCAAGAAAATAACCAAATGACTAATAGTCCTGTTTTTGAGCCTTTAGGTACTTCAGTCTACCTCAGACAAAGAGATTTGCTACACAAATTCTGTCAAGAAAACATAGCAAATATCCCAATACCAACAACTTCCAAAACAATCCCTTTTCGAAACTCTTTGTATACACAGAGTTACAAGTTTCCAGAGAAGAAAAAACTATACAGAGGAGTAAGACAGAGGCATTGGGGAAAATGGGTTGCTGAGATAAGACTTCCACAGAATAGAATGAGA…
StDREB50	ATGGGTGAGCGTTTTGTTGTCTTGCCACATGTTGTACGTATTTACATAACAGACAATGACGCAACAAACTCGTCCAGTGATGAGGAAGAAAATCTTCAAGGAGAGATGTCCAAACGACATAAAAGGATTTGTAAAGAGATTATCATCAGAAATGGAAAAACCAATGTCACTTCCAAGATGGTATCGTCCAAAGAAAAAACAGACACAAAACTTCTCCAAGAAAATGTAAAGAATTACAGGGGAGTTAGACAACGAAAATGGGGAAGATGGGTTGCAGAGATTCGAGATGTAAGAATGAATAAACGACGTTGGTTGGGAAGTTTTGACACTGCGCTAGAAGCTGCTTTGGCTTATGACAAGGCAACCATTGAATTAAAAGGTGCTAATGCTGTGAAGGAA…
StDREB51	ATGATGAATGTTTATGGCACTGTCTCACAACGCCATTGGGGAAAATGGGTAGCAGAGATTCGCCTTCCTCGTAAAAGAACTAGACTTTTGTTAGGCACGTTTGGAAGTACTGAAGAAGCTGCTTTTGCTTACGATGTCGAGGCCTCTAGGCTCAGAGGAACAGATGCACGTCTTAATTTCCCACATCTGGTTTTGGCCTTTGATATGTTCAATTCTTGA
StDREB52	ATGGTACAGGCAAAGAAGTTTAGAGGTGTCAGGCAACGCCATTGGGGTTCTTGGGTTGCTGAAATTCGTCATCCTTTGCTGAAGAGGAGAGTGTGGCTAGGAACTTTTGAAACTGCGGAGGAAGCTGCCCGAGCGTATGATGAGGCTGCGGTTTTAATGAGCGGACGTAACGCCAAAACAAATTTCCCAGTGCAGGCTACTGATGAAAATAAAAAAGACAACTCTAAATCTAATAATTCGGCTTTATCGGCCGGATCATCATCATCATCACTCTCTGCTATACTTAGCGCCAAACTTCGCAAGAGCTGTAAATCGCCTTCGCCGTCTCTCACTTGCCTCAGGCTTGATACGGAGAGTTCCAACATTGGGGTGTGGCAGAAACGGGCAGGAGCCCGGCCT…
StDREB53	ATGAGTTCAGGTGCAAAATACAGAGGGATTCGGAGGAGAAAATGGGGGAAATGGGTGTCGGAAATTCGAGTTCCAGGTAGTAGTGAACGGCTTTGGCTAGGTACTTACACTAGCCCTGAAGCTGCAGCTATAGCACATGACATTGCCTATTATTGTCTCCGTCCAGAATCATCGTCTTTACATAAATTAAACTTCCCTTCCATGTTACCGCCTAATGTTCAACCTGGAATGTCACCAACATCTGTACAAAAAGTTGCCTCTGATGCTGCCATGGCTATTGATGCTCAGTTTCTTACAATACCAACACCTGCTCAACAACATCGTCAAACTGCTGATAATTATGGGCAAAATCAAGGTCTCAACATTTCTGTTGAAGATTATCAATATTGA
StDREB54	ATGGAAGCCAACCCTACTCATGATCAGCCAAAGTTCAAAGGAGTTCGGTTGAGAAAATGGGGGAAATGGGTTTCTGAAGTCAGATTGCCTAATAGCCGCGACAGGATTTGGTTGGGCTCATACGATTCTGCTGAGAAAGCCGCAAGGGCTTTTGATGCTGCACAGTTCTGCCTCCGCGGGCCGAAAGCTAAGTTTAATTTCCCTGATAGTCCGCCGGATATATCCGGTGGACAAAGGCTTTCCCCCGCAGAGATACAGGCTGTAGCAGCTAGATTTGCGAATGATTACTCGCCGTCAGTGGTACAGGAGATACAGCGTGATGACCATGAGGGCAATATTGGAAATATTAATTCACACGTGATAAATATGGAAAAAGATGAGATTTCGCTATCAACAACT…
StDREB55	ATGTCTTACACATATGATGAGGCTGCTCAAATTAGATCTTCTTTATCTCAAATCCTATTAACAAGTAGTACCAACACTTTAGACTCAATATTTTTTCATTGCCAAGAACCAAAAAATCAAATGACTACTACTAGTCCTGTTCTTGAACCACTATGTTCTTCAGTCTATCTCAGACAAAAAGATTTGCTCCAAAATTTTTGGGAACAAAACAGAACAAATATCACAATTCCAACAACTTCCACACAAACCCCACTTCAAGAATCATTATACTCACAAAGATATGTTAGTCCAAACAAGAAAAAGTTATATAGAGGAGTGAGACAAAGGCATTGGGGAAAATGGGTGGCTGAAATAAGACTTCCTCAGAAGAGAATGAGAGTTTGGCTTGGAACTTATGAC…
StDREB56	ATGAGAGGTCCTGATGCTGTGACAAACATCCTTAAGCCACCACCAAGAGAGGTACAACCAATGGAAAACAACCTCATCAACCCACCGCCAAAGGAGATCAATTTTATGAATCTTTCATCTTCATCCTCAAATGATGCTAGGATTGTGTGGATTACTGATTCTAGTAATGAGCCAACAACTTATTGTGATGGCTTGGACTTGGACCTTTACGCTAGTTCCGTCCCTGATTGTTGGATGTTTGTCGCAAGAATATCACGAAAAGAAGGTTATCAGAAAACCCTAAAAAATGATGCCACTAAAAAATCAACTGTTCAAGTAGAAGGAAGTTCTTCTGTCCAACCCAACCCCGCAGGAGTTTACTTGTGGGGTGTCAATCTGATGAACGTGTCTAATGAGGAT…
StDREB57	ATGAATAACGACTCGAGTTTGTACTCGTCAGATCTCAACCCATTAAGTGCAACAATAGCTTCCGATGAGGAAGGAATACTATTACTAGCTTCAAGCCGACCCAAGAAACGTGCAGGGAGGAAGAAGTTCAAGGAAACTCGCCACCCGATTTATAGGGGAGTGAGGAGGAGGAATAATAGCAAGTGGGTTTGCGAGCTACGTGAGCCTAGTCAACAGAAAAGAATATGGCTAGGGACTTACTCTACTCCTGAAATGGCGGCTCGAGCTCATGATGTTGCTGCATTAGCTCTTAGAGGTAATCTAGCCACTCTGAACTTTGCTGACTCTCGTTGGCGATTGCCAGTGCCCGCATCAAAGGACCCCAAGGACATACGACAGGCGGCAGTTATAGCCGCACAA…
StDREB58	ATGGCGGCTAGAGCTCATGACGTGGCAGCTTTAGCATTAAGAGGCCGTTCTGCTTGCTTGAATTTCGCTGATTCTGCTTGGAGGTTGCCTATCCCTGCTTCCTCCAACTCTAAGGATATTCAAAAGGCGGCCGCTGAGGCCGCCGAAATCTTCCGACCATCAGAAGAGTCGGAAAGAGTTGCAAGTTCTGAAATGCATGAGAGTATATTTTTTATGAACGATGAAGGACGAGAGAGTAGTTTCTTCATGGATGAGGAAGCGTTGTTCGACATGCCGGGATTAATTGCGAATATGGCGGAAGGACTAATGCTACCTCCACCGCAATGTGCAGAAGTAGAAGATCATTATTATATGGAAGCTGATGATGCTTACATGCCTTTATGGAATTATTAG
StDREB59	ATGGCGGCTAGAGCTCATGACGTGGCGGCTATAGCATTAAGAGGAGGTTCTGCATGTTTGAATTTCGCTGACTCTGCTTGGAGGTTGCCTACCCCGGCTTCCTCTGACACTAAGGATATTCAAAAGGCGGCCGCTGAGGCCGCCGAATCCTTCCGACCATTGAAGTCGGAAGAAGAATCAGTAGTTAGTACTGGAGATCAATCTAGTACTCCGGATAATATGTTTTTTATGGATGAGGAAGCGCTGTTCTGCATGCCGGGATTACTTACGAATATGGCGGAAGGATTAATGGTACCTCCACCTCAATGTACTGAAATGGGAGATCATGTGGAAGCTGATGATATGCCTCTATGGAGCTATTCTATCTAA
StDREB60	ATGGCCAACCTTTCACATACTAGTGGTCAATTAGTACCAAACATTCTAGTTGACAACAAAAAAAGTGCAAGAACAAATACCAAACATCCTATATACCGTGGTATACGTTGTAGAAGTGGAAAATGGGTGTGTGAAATTAGAGAGCCACGTAAAACAACAAGAATATGGTTAGGTACATACCCTACTCCACAAACGGCTGCTGCTGCCTATGATGTTGCTGCCTTAGCTCTTAAGGGTACTCAGAATATTGTACTCAATTTTCCTCATCTTGTCAATTCTTATCCAAAGCTCCCTCCCTCACCATCTCCGGACAATATACGTTGCGCCGCGGCCACAGCGGCAACGATGATGGCTCAACGAGGTGACGATGGTCGGTCGTCGGGAAGCAAGACAACAGCT…
StDREB61	ATGAAGCCACCAGTACCTCAGCCAAGTGACGGTATTAGAACACGAAGAAAACCATCATCAAGGGGCCATCCAAGATTTGTTGGTGTTCGCCAAAGGCCATCAGGAAGATGGGTTGCAGAGATCAAAGATTCTTTACAAAAGGTGAGGCTATGGCTTGGTACTTTTGACACTGCTGAGGATGCTGCAAGGGCATATGATCAAGCTGCTCGCACATTAAGAGGGGCTAATGCTCGTACTAATTTTGAACTACCCGCGTCTGATTCCCACCAAGGTAGTAGTATTCTTGAAAATTCTGTGCCTTTTAACTTTGAAGAAGCCTGCAGAACAGAGGAACCTGAAAATAGTCTTGTTGGTGCACTTAAAGCTAAACTCTTTAACAGCAAGAATTCAAGATCTTTC…
StDREB62	ATGAAAACCACCATCACAACCAACACCAACACCACCAAATCATCATCAACACAACCAAAGAAATCATCAATAACAAGAAAATTTGTAGGTGTAAGACAAAGACCCTCTGGAAGATGGGTTGCTGAGATAAAGGACTCGTCTCAACGTGTGAGATTATGGCTAGGAACATACGATACTGCTGAAGAAGCTGCTCATGCCTACGATGAAGCTGCCCGAGCCCTACGAGGCGAAAATGCACGAACCAACTTCGCTTCTACTGCTCCAAATTCCGATATGGATCAATCGCATAGTTCACATGATACTAAACATGGTCTTAGCTTTTCTTCTATAAAAGAGAAATTAAGTAAGAACTTACAAAGCATCATGGCTAGGAATTCAGAAAATAAGTCTTCTTCATCG…
StDREB63	ATGAATAGCACCAGTGCAGGTAGTAATAATGATCAACATCCCCACCCTACCCAAGACTTAGACCTCACCAACCAAGAAGATAAAACAACTACTGCTTCTCTCACCACACAAACCAGCAGTGAAGAGAATAGTTCAAGTAGGAACAAGAAAGGTAGTAAAGGCAAAGGAGGACCTGATAACAACAAATTCAGGTATCGAGGAGTTAGACAACGCAGCTGGGGCAAGTGGGTCGCTGAGATCCGTGAGCCCCGTAAACGGACTCGCCGTTGGCTCGGTACTTTCGCCACTGCTGAAGATGCTGCTCGAGCTTATGACCGTGCCGCTATTATACTCTACGGTTCAAAGGCTCAGCTCAATCTTCAACCTTCAGGTGCAAACGCTACTAGTTCATCATCAAAT…
StDREB64	ATGAATAGCACCAGTGCAGGTAGTGATAATCCCCACCCTACCCAAGACATTAACCACCAAGAAAAATCCACCAGTGAGGAGAAAAGCAACAAGAAAGGTAGTAAAGGCAAAGGAGGACCTGATAACAACAAATTCAGGTATCGAGGAGTTAGACAACGCAGCTGGGGCAAGTGGGTAGCTGAGATCCGAGAGCCCCGTAAACGGACACGCCGTTGGCTCGGTACTTTCGCCACTGCTGAAGATGCTGCTCGAGCTTATGACCGTGCCGCTATTATACTCTACGGTTCAAAGGCTCAGCTCAATCTTCAACCTTCAGGTGCAAACGCTAGTAGTTCATCATCAAATTCTTCTAAACGCGGATCTACATCTTCTACTACACAAACTCTTCGTCCTTTACTT…
StDREB65	ATGACATCCAAGAATAAGTATCACGAAAAGAAGGTCATTAGAAAACCCTCAAAAAATGATGCCACTAAAAATTCAACTGTTCAAGTAGAAGGAAGTTCTTCTATCCAACCCAACCCTGCAAGAGTTTACTTGTGGGGTGTCGATCTGATGAATCTATCTAATCATGAGGATAAAGGGAAGGTCAAGGAAGAGAAGTCAAAGGGACGTGATAAGACACGTCAAAAGAAAATCTTCAGTGAGAATGAAAATGTCAAGGCAATTTCAATTGAAAATTCAAAAGAGAAACCACAAGAAAATGTGGAAAAGTATAAAGGGGTTAGGCAGAGAAAATGGGGAAAGTGGGTTGCAGAGGTATATGACCCAAGAACGAAAGGCCGAATTTGGTTAGGGACATTTAAC…
StDREB66	ATGGAAAACTCAAAATCCTCATCAGAGTCCTTAAATAACTCATCCAAAAACATCCAACAAAATAAGCCAATTTCCTCAAATGATGGAAAGAAATTTATTGGAGTTAGACAAAGGCCATCAGGCAGATGGGTTGCTGAAATCAAAGAAACTTCACAAAAACTCAGGCTATGGCTTGGTACTTTTGACAAAGCAGAGGAAGCTGCTCTGGCTTATGATAGTGCTGCACGTCTTCTTCGAGGAAGAAACGCGAAAACAAATTTCAAGAACCAGGGAATCTTGAAACCAAATGAAGAGAATTGCAGTTTGTTGGAAAAAAATCCAAGATTATATCAACTTATGAAACATGCCATCATGAAGAAACTTGCAGGGAAATATCAAAATAATGAACGTTTAGAAACA…

## Sheet: Sheet2
Genomic Sequences of 66 StDREB genes
Gene name	Genomic Sequences
StDREB1	ATGTTGTTACTAGCTTCGAAAATCCCAAAAAAACGTGGAGGTAGGAAGAAGTTTCGTGAAACTAGACACCCGGTTTATAGGGGAGTGAGGTGGAAGAATTTCGAAAAGTGGGTTAGTGAAGTGAGAGTACCTGGTAAAAAGTCAAGAATATGGCTTGGCACGTTTCCCAATGCAGAAATGGCAGCTAGAGCTCATGACGTGGCGGTCATGGCTCTTAAAGGCCGGTCAGCTTGTTTGAATTTTGCTGACTCGGCTTGGAGGTTGCCTGTCCCTGCTTCAGCAACCGCCAAGGATATTCAAAAGGCGGCTGCTGAAGCAACTGAGACATTTCGTGCGTCAGAATCCTTGGAGAGAGAAAACTCTGAGGAAGTTGTTGTTAATAATGATGATCATTATGTT…
StDREB2	ATGTTTCCAAGCTATTATTCGGAGCCACTCACTCAATTATCATCATCGTCATCATCAATACTATCTGATAATAGCAATCACTACTCCCCTAATAATAATTTTTCTGATGAGGAAGTTATTAATTTAGCTTCAAATAACCCGAAAAAGCCAGCTGGCAGGAAGAAGTTTCGAGAAACTCGACATCCCGTATTCAGGGGAATCAGGATGAGGAATTCCGGAAAATGGGTTTGTGAAGTTAGAGAACCAAATAAGAAATCTAGAATTTGGCTCGGCACATTCCCTACTGCTGAAATGGCGGCTAGAGCTCATGACGTGGCGGCTTTAGCATTAAGGGGCCGTTCTGCTTGCTTGAACTTTGCTGACTCTGTTTGGAGGTTGCCTATCCCTGCTTCCTCCAAC…
StDREB3	ATGGATATCTTTCGAAGCTATTATTCGGACCCACAAATAGAATCTTCTTCATCATTTTCTGATACTACTACTTATAACTCTCCTAATAGAGCCAATCATTCTGATGAGGAAGTTATTTTAGCTTCAAATAATCCAAAGAAGCCAGCTGGAAGGAAGAAGTTTCGAGAAACTCGACATCCAGTATACAGGGGAGTCAGGATGAGGAATTCAGGAAAATGGGTTTGTGAAGTCAGAGAACCAAATAAGAAAACAAGGATTTGGCTTGGTACTTTTCCAACTGCTGAAATGGCGGCTAGAGCTCATGACGTGGCGGCTATAGCATTAAGAGGCCGTTCTGCTTGTTTGAATTTTGCTGACTCTGCTTGGAGGTTGCCTACCCCGGCTTCCTCCGACACTAAG…
StDREB4	ATGTCTACAGAGCAACCAAATTGTTCAGAAAGTACTGAATCTAGCTGCAACTCTTCTTCTTCTTCGCCGCCCTCATCGCCATCTTTTGTTCTTCTTCAACCACTTCCGCAAATCAATTCGAAAAATCGACTCAAAAGATGCAGAGGAGAAGAAGAAGAAGTAAACGAAGTCGTTAATAATGCAAACCCAAATCCGAAGAAGATCAGTAAAAACAACAATGGTGGTAGTACTGATGTTTCGTATGTAGGTGTACGAATGAGAGCATGGGGTAAATGGGTATCCGAAATCCGTGAACCTAAAAAGAAATCACGGATTTGGTTGGGTACCTTCGCTACCCCGGAAATGGCGGCGCGTGCTCACGACGTAGCCGCCATGTCCATTAAAGGAACCTCAGCAATA…
StDREB5	ATGAATGATAATAACTTTAGAGATCACTACTTGCACGAAACATCAACATCTTCAGGAGGAGTTCAAGATGAAGGAATATTTCTACTAGCTTCGAGTCAACCTAAGAAACGTGCAGGGAGAAAGAAGTTCAAGGAAACTCGCCACCCAATTTATAGGGGAGTGAGAAGGAGGGATAATAATAAGTGGGTTTGCGAGGTACGTGAGCCTATTGAGCAAAAAAGAATATGGCTAGGAACTTACCCTACTCCTGAAATGGCAGCTCGAGCTCATGATGTAGCTGCATTAGCACTTAGAGGTAATCTAGCCACTTTAAATTTCGCCGACTCTAGTTGGCGGTTGGCGGTGCCGGTATCAAAGGATCCCGAAGAATTACGCCAGGCCGCTATGAAAGCAGCCGAA…
StDREB6	ATGAATATCTTTGAAACCTATTATTCAGACCCACTAATTTTAACCGAATCTTCTTCTTCTTCTTCATCATCATCTGACGAGGAAATTATTTTAGCTTCGAATAACCCAAAAAGGCCAGCTGGAAGGAAGAAGTTTCGAGAAACTCGACATCCGATATACAGGGGAATCAGGATGAGGAATTCAGGAAAATGGGTTTGTGAAGTCAGAGAACCAAATAAGAAATCAAGGATTTGGCTTGGTACTTTTCCTACTGCTGAAATGGCGGCTAGAGCTCATGACGTGGCAGCTTTAGCATTAAGAGGCCGTTCTGCTTGCTTGAATTTCGCTGATTCTGCTTGGAGGTTGCCTATCCCTGCTTCCTCCAACTCTAAAGATATTCAAAAGGCGGCCGCTGAGGCC…
StDREB7	ATGGCGGAATGTGTAGAATCAAAGAAATCAATAGTTGGACGTTCGAGAAAAGGTTGCATGAGAGGTAAAGGCGGTCCAGAAAACGCGTTGTGCACATATAGAGGAGTGAGACAAAGAACATGGGGCAAATGGGTAGCTGAAATAAGAGAACCAAATCGTGGAGCACGAATTTGGTTAGGCACTTTCAATACATCAGTCGAAGCAGCCAGAGCCTATGATGACGCAGCACGCCGGCTTTATGGTTCTGATGCGAAGCTCAATCTCTCAGAAGAAGAAGAATCAATAATTTCTTCGGACACAGAAATTAGTTGCATGGAAAACAACATAATCGAGGAATGTTCTGTACTTGAGGAAGCATCCATATTTAAAGATGGAAACGGGGAGTATTTGGTGTGGGAT…
StDREB8	ATGCCAGGCAAAGGCGGTCCTGAGAATTCGAGTTGTAAATACAGAGGAGTTAGGCAGAGGACTTGGGGTAAATGGGTGGCTGAAATTCGCGAGCCTGTTTATATTAGTGGTGAGTATAAGAACAGAGGAAAGCGACTTTGGCTAGGTTCTTTTGCTACTGCTGATGAGGCTGCTATTGCTTATGATGAAGCTGCTAAGGTTATGTATGGATCCAATGCCACACTTAACTTCCCCAATTATTGTGGATCGTCGAGTAATGATACATCTTCACTTGAATCGAGTGGTCAATCGTCTGTTGATCATGAAGATTTAGTGGTTGATGATGCAGAGAAGATTGAAATTGAGTCGGATTTGTAA
StDREB9	ATGGCTATTATGGATCAAGCTGCTAATATGGCTACTCTGCCGTTGGATTATAGTGGAAAGAGGAAATCAAGGAGTAGAAGGGACAGAACAAAGAATGTGGAAGAGAGACTAGCTAAATGGAAAGAGTATAATGAGAAACTAGATAGTGTTGATGATGAAGGGAAGCCAGTGCGTAAAGTTCCTGCTAAAGGTTCAAAGAAGGGGTGTATGAGAGGTAAAGGGGGACCCGAAAATTCGCGGTGTAAATACAGAGGTGTTAGACAGAGGATATGGGGTAAATGGGTTGCTGAGATTAGGGAACCTAAAAGAGGTAGTAGGCTATGGTTGGGTACATTTGGTACAGCAATTGAAGCTGCTCTAGCATATGATGAAGCAGCAAGAGCTATGTATGGTCCTTGT…
StDREB10	ATGTCAACAACCTCCAAGAAGTTGATCCCAGCTACATCCCGCAAGGGATGTATGCGTGGTAAAGGTGGCCCCGAGAATGCAAGTTGCACGTACAAAGGTGTACGGCAACGCACCTGGGGCAAATGGGTAGCCGAGATCCGCGAACCCAATCGCGGAGCTCGGCTTTGGCTCGGCACCTTTGATAATTCTTATGACGCTGCTGTCGTCTATGACGCTGCAGCCCTTAAGCTTTATGGTGCCGAAGCCAAACTCAATTTGCCCCATCTGTACAGCATTCCGGCCCAGGATCAGTCCCAGGCCCAGTCCCAAATCCAAAACTCTAGGCCCATTACTATCATGAGCCCATCTCTAGCTCCCGTTTCAGCTACTGCTCCAGCTTCAGTTCCTGCTCCGCCTGTA…
StDREB11	ATGGAAGAAAAAGATGAATCTCCCATTATTTTCAACAACAATCAAACAATCCCTTCTTCATCTCTAACAAAAAGATCAATAACCTTAAAACCATCAAAACAACAAAGCAATCACAACAAGAAAATCAAATCCAGTACAGAAAAAACCAAGAAAATTGATGACTCAAAACACCCAATTTACCACGGTGTTCGAAAACGGAGCTGGGGTAAATGGGTGTCTGAAATTCGCGAACCGAGGAAAAAATCAAGAATTTGGCTTGGTACTTTTTCTACTGCTGAAATGGCTGCCAGAGCACATGATGTAGCTGCAATTGCCATTAAAGGTGACTTAGCTTTACTCAATTTCCCTGAATTAGCTCATCAGTTTCCTAAACCAGCTTCGAAATGCGCTAAAGATATT…
StDREB12	ATGATGGAAGGAGAAAAGAGAAAGCAGAGGGAACACCAACAAGATAAGCCATACAGAGGAATACGGATGAGGAAGTGGGGTAAATGGGTAGCTGAAATTCGAGAACCAAACAAACGGTCTCGAATTTGGCTTGGTTCTTATTCTTCCCCTGTTGCTGCTGCTCGTGCTTACGATACCGCTGTATTTTACTTGCGAGGTCCTTCAGCTAGGCTTAATTTCCCTGAATTCATAGTTGATGACCATGAAAATCACGATCTATCAGCTGCTTCTATTAGGAAGAAAGCTACTGAGGTAGGTGCTAGAGTTGATGCTCTTCAAACTGCGATTCATAATTCTACTGCTATTCCTCCTGAATCCAATTCTAAATCCACAAGGATGATGATGAAGCCTGATTTGAAT…
StDREB13	ATGGATTTTTGTGTTGACAGGAAACTGAAAAGAAGGCGTAATGGATCTGATTCCATAGATGAGATTTTATTAAGATGGAGAAATTTTAATAAGGAGGTTAATTCAAACAATGAACAAGTGAAGAAGAAGAAGAAGAGAAAATCTCCGGGTAATGGATCAAACAAAGGTTGTATGCCAGGCAAAGGCGGTCCTGAGAATTCTGGTTGTAAATACAGAGGAGTTAGGCAGAGGACTTGGGGTAAATGGGTGGCTGAAATTCGCGAACCTGTTTATATTAGTGGTGAGTATAAGAGCAAGGAAAGAGGCTTTGGCTCGGTACTTACTCGACTTCTGGTGACGCTGCTATTGCTTATGATGAAGCTGCTAAGGTTATGTATGGATCCAATGCCATACTTAATT…
StDREB14	ATGAATGATTCGAGTAACTCATGTTCTTCGAATAGAACGGAACGTTCGGATGAAGAAAATATTTTATTAGTATCATCTAACAAGCCGAAGAAGCGAGCGGCCGGGAGGAAGAAGTTCAAGGAAACACGTCACCCGGTGTTTCGAGGAGTGAGAAAGAGGAACAACGACAAGTGGGTTTGCGAAATTCGCGAACCCACTAAACAAAAGCAAATATGGCTAGGTACGTACCCAACCGCGGAAATGGCTGCACGTGCTCATGATGTGGCTGCATTAGCGCTTAAAGGAGAGTTAGCCACACTGAATTTCGCGGACTCCGCTTGGCGTTTACCGGTTCCGGTATCTAAGGACCCGAAAGAGCTCCGCCAAGCGGCTGCTAGAGCAGCTGAGGCGTTCGAACCG…
StDREB15	ATGGACAGCTACAAAAGAAATCCACTAAAACCATGGAAGAAGGGCCCGGCAAGAGGGAAAGGGGGCCCGCAGAACGCGTTATGTGAATACCGCGGCGTTCGACAGAGAACATGGGGGAAATGGGTAGCAGAAATCAGAGAGCCTAAAAAGAGAACTAGGCTATGGTTAGGATCTTTTGCTACAGCTGAAGAAGCTGCAATGGCTTATGATGAAGCAGCAAGAAGATTATATGGACCAGATGCTTACCTTAATTTACCTCATATGAGAGCTAATTTCAATCCATTGAACAAATCACAAAAGTTCAAATGGTTTTCATCAACCAACAACTTTGTTTCATCATTAATCCCAAATACCACTGGCTTACTCAACTTAAGTGCTCAGCCAAATGTTCATGTAATT…
StDREB16	ATGGAGCAAGTAAAATCACCACCATCCTCCCGGGCAATAACAAATTGCCGGGGAGGGGGTGGGGGAAGTAGTACGAGACACCCTATTTATCGTGGTGTCCGTAGACGAAGATGGGGAAAATGGGTGTCCGAAATTCGAGAGCCAAAAAAAAAATCGCGAATTTGGTTAGGTTCTTTTATTTCACCCGAAACGGCAGCTCGAGCTTATGACGTGGCGGCTTATTGCCTCAAGGGAAGTAAAGCGGAGCTGAATTTTCCAGATGAAATAGAGCGATTACCGCGGCCAATAAGTTCCGGGGCAAGAGATATTCAGGCAGCAGCGACGATGGCAGCGAATATGGGGATTGTGAAGGGAAAAAATGATGAAGATCGTTGTTGTAGCGATGATTTTTGGGAAGAA…
StDREB17	ATGAATTCAGTAGCAGCTCAAGATAATAATGAAATTATTAGTAACAACAAGTCGATAAAGAGGAATCGCGATAGCAGCAAGCATCCAGTTTTTAGAGGAGTTCGAATGAGGAATTGGGGAAAATGGGTGTCAGAAATTCGCGAGCCACGTAAGAAATCACGTATTTGGCTTGGGACTTTTCCAAATCCAGAAATGGCAGCTAGAGCTCATGACGTGGCAGCGTTAAGCATAAAAGGTAATTCAGCTATACTCAACTTTCCTGAACTAGCTGGTTTGCTTCCTAGACCGGCTACACTTAGCCCGCGTGACATTCAAGCAGCCGCAGCAAAAGCCGCAGCTATGGACAAGTTTGATAATAATAATGGTATTACTTCGCCGAATAATTCAATTTCATCAAAT…
StDREB18	ATGGATTTTGAAGATGCACTAACTTCTTCTTCTTCATCTTCTTCTGATCATGATAATAAAGAAAAAAACATTGATCTTTCATCGTGTTCGACGAATAATAATAATGTACAATTCAAGAGGAGGGCAGGGAGGAAAAAGTTCAAGGAGACTCGACATCCATTATATAGAGGAGTTAGGAGAAGAAATGGAGAAAAATGGGTGTGTGAAATACGCGAGCCAAATAAAAAAACAAGAATTTGGTTAGGTACTTTCTCTACTCCTGAAATAGCAGCTAGGGCACACGATGTTGCTGCCCTAGCTCTCCGGGGAAGTAATGCTCTTCTTAACTTCCCCGGATCCGCTTGGTCTCTACCTAAAGCTAAATCTTCTTCTCCTCAAGACATTCAAATCGCGGTTCTC…
StDREB19	ATGTCAAGTTCTGGGGAAAATAACGGATCAGGACGACACCCGGTATACAAAGGGATAAGAAGAAGGAAAAGTAGCGGAAAATGGGTGTCAGAAATTCGGGAACCGCGGTCTCCTAATCGGATTTGGCTCGGTACATTCCCGACCCCGGAAATGGCTGCGGTCGCTTATGACGTGGCAGCACTTGCACTCAAGGGTCGGGATGCCGAGCTTAATTTTCCAAACTCGGCCCCCTCGTTGCCTGTCCCGGCTACTAACTCACCCCGGGATATCCAGACTGCTGCAGCCTGTGCGGCCGCAGCACTCGGGGCAGCCGGGGATGCGTTAGTAGGGGGGAGGAGTAGTAGTAATAGTAATAGCAGAGCGGTTTCAAGAGAAGTGGAGGATAATTATTTGATGCCT…
StDREB20	ATGGAAGGAAAAAAAAAGAAGAAGAGAAATGGAGAGGAAGTATTATATAGAGGTGTACGTATGAGAAATTGGGGAAAATGGGTATCCGAAATTCGCGAGCCTCGTAAAAAATCTCGTATTTGGCTTGGTACGTTTTCTTCGCCTGAAATGGCAGCTCGAGCTCATGATGTAGCCGCTTTATCTATCAAAGGTAATAACATCGTCTTTTGTGTTCTAGTTTATGTGACGTTATTTTTTTAGTATATATAGTCTGTTTAATTCATCCTATGAATGGTATAATATGTTAAGATGAGACAATAATTAAGTTTCAAATTCAAATCGAGATTTTACTTCTGTCACAAGATTGAAATAACATAGATATTATAATTACCTTATTATTAAGGGAAAGTGTTATTTTTA…
StDREB21	ATGGCTGACTCTCAAAATTCTACCAAGTCCAACCAAGTAATTCAACCTCCTCATCAATCTAGTGAAAGTACTAAAACACCCTTCAACCCTACCCCTCCTCCACCAATACCACCGCCACCGGCACCGCCGCCACCCCCAGAGACACACATTCAAACAACCAATACATTATTATCAAAATTCGAAAACACAAATTCAACTCCAAAAACAGTTCAACTACCAAATATTATCCCAGCTACAATCATGAGTTCCACCTCATCGGGCAGTTCGGGATCTCCGAGCCGCCCGATAGGGGGAAAACACGCAGTATTCCGCGGAATACGATGTAGGAGTGGGAAATGGGTGTCCGAAATTCGAGAGCCACGTAAGACTACGAGAATATGGTTAGGTACTTACCCTACA…
StDREB22	ATGAAAGTTCAACTTGAAAAATCAAATAGCTTAGATTCTTCTTCTTCATCCTCGTCCTCATCCTCCTTTAACGAGGGCAACATTAACACAAAGATCCTAAAAGAGTACGAATCGAATAAAGTTGAAGAATTCAATAGGGACGACAATGAGAACAAGAGGAGGAAAAAAGTTATTCAGGACGATCATGATGACAAGCATCCAACCTATAGAGGAGTTCGTAAGAGGAATTGGGGAAAATGGGTGTCAGAAATCCGAGAGCCAAGGAAGAAATCAAGAATATGGTTAGGAACTTATTTGACAGCTGAAATGGCTGCTCGAGCTCATGATGTTGCGGCTTTAGCCATTAAAGGTCACTCGGCTTACCTTAATTTCCCTTATTTAGCTGATCAACTCCCACGT…
StDREB23	ATGAATAACAACTCTAGTTTGTACTCGTCAGATCTCAACCCACTAAGTGCAACAACACCTTCCGATGAGGAAGGATTAATACTATTATTAGCTTCAAGCCGGCCCAAGAAACGGGCCGGAAGGAAGAAGTTCAAGGAAACTCGCCACCCAGTTTATAGGGGAGTGAGGAGGAGGAATAACAACAAGTGGGTTTGCGAGCTACGTGAGCCTAGTCAACAAAAAAGAATATGGCTAGGGACTTACCCTACTCCTGAAATGGCGGCTCGAGCTCACGATGTTGCTGCATTAGCACTTAGAGGTAATCTAGCCACTCTGAACTTTGCTGACTCTCGTTGGCGGTTACCAGTGCCAGCATCAAAGGACCCCAAGGACATACGCCAAGCAGCCGTTATAGCCGCA…
StDREB24	ATGGAAAATCAAGAAGAAATAATCAACCTCGAAAATCGTCATGATTTCATCTGTAATGGCTTGAATTCTCCTTCAAACACCGCGACATCATCATCATCATTTTCGAGAAAAATTGAAGAAGAGAAAAAGAAAAAAAAAAGAAATGATGATGACAATAAGCACCCAACCTATAGAGGGGTACGTAAGAGGAGTTGGGGCAAATGGGTGTCCGAAATTCGAGAACCAAAAAAGAAATCAAGAATATGGTTAGGTACTTATCCAACAGCTCAAATGGCAGCTCGAGCTCATGATGTTGCGGCTTTAGCCATCAAGGGATGTTCGGCTCACCTTAATTTTCCTCATTTGGTTGATCAATACCCGCGTCCGGCATCCACTTGTCATAAGGATATCCAAGCAGCA…
StDREB25	ATGGAGGTTGACGGCGTCAGAAGCGGCGATGCTGGGGTGGTTGGAGGCGGAGGAGGAGGAGGAGGAGGGTGTTGCTCCGGGAAGAGAAAAAACGAGAGGGCTTACAAAGGAATAAGGATGAGAAAATGGGGGAAATGGGTTGCTGAAATCCGAGAGCCAAATAAACGGTCGAGGATATGGTTGGGCTCGTATACGACGCCTGTTGCAGCTGCAAGAGCATACGATACAGCTGTTTACTATCTCCGGGGGCCATCGGCCCGGTTAAATTTCCCGGAGCTGTTAGTCGGTGATAGCGGCGAACTCAGTGATTTGTCTGCTGATGCAATTCGTAAGAAGGCTGTTGAAGTAGGTGCTAGAGTTGACGCTATCCAGAGTTCAATGGCTATTTCCGATGATGAC…
StDREB26	ATGGGCGGTATAACATCAGAATATAGAGGTGTTAGAAAGAGGAAATGGGGTAAATGGGTGTCCGAAATCCGTGAGCCAGGAAAGAAAACGAGGATATGGCTAGGGAGTTTTGAGACAGCAGAGATGGCGGCGGCTGCATATGATTCAGCTGCATTTCACCTCAGGGGACATGCAGCTAAGTTAAATTTCCCAGAGTTGATTGGACATTTCCCTAAACCAGCAAGTTCTTCCCCTGAAGATATACGTTTGGCTGCACAACAGGCTGCAATTACAGTTCAAAACACAAATATCATGGCCTCTACTAGTCATGGCCATGAAGCACCAGTTACAGTAGGACTATCTCCAACTCAAATTCAAGCTATTAATGACTTTCCTATGGATTCACCAAATATGTGGACT…
StDREB27	ATGGCGGAAGTTGAAGTACAAATTTCAGAAACAGAGAGCTCTTCTAATACTAATACCTCTGTTTCTTCTTCTTCGTCTTCGTTGTCCGCTGATTCCATGCACAAATCGGTTTTTGATTCGTCAAACAAATTACCGAAAGGGAAGAAACGGCCGACGAAGAAACAGAAGGCTATTACTAATAGTGAGAGTAGACATCAAATTTACAGAGGAGTTAGGATGAGAAGTTGGGGGAAATGGGTATCTGAAATTCGTGAACCGAGGAAGAAATCACGTATTTGGCTCGGTACTTATCCTACAGCAGAAATGGCCGCTAGGGCACATGATGTTGCAGCGGTGAGTATAAAAGGAAAATCCGCCATTCTCAATTTCCCTCATCTAATCGACTCGTTGCCTCGTCCA…
StDREB28	ATGGAAGAAAAAGATGAATCTCCCATTATTTTCAACAACAATCAAACAACTTCTTCTTCATCTCTAACAAAAAGACCAATAACCTTAAAATCATCAAATCAAGAAACCAATCACAACAAGAAAATCAAATCCAGTACTGAAAAAACCAAGAAAATTGATGACTCAAAACACCCAATTTACCACGGTGTTCGAAAACGGAGCTGGGGAAAATGGGTGTCTGAAATTCGCGAGCCGAGGAAAAAATCTAGAATTTGGCTTGGTACTTTTTCTACTGCTGAAATGGCTGCCAGAGCACATGATGTAGCTGCAATTGCCATTAAGGGTCACTTAGCTTTACTCAATTTCCCTGAATTAGCTCATCAATTTCCTAAACCATCTTCGAAATGCGCTAAAGATATT…
StDREB29	ATGGCTGTGCTTGATCAAACATCAAATATGATGTTACCTATGGATTATACAAGAAAGAAGAAATCAAGGAGTAGAAAAGATGCTCCAAAGAATGTAGCAGACACACTTGCGAAGTGGAAAGAGGTGAATGAGAAATTAGACGCGTGTGATGATGATGGAAGAAAGCCAGTACGTAAAGTTCCGGCTAAAGGATCAAAGAAGGGATGTATGAAAGGTAAAGGAGGACCGGATAACGGGCGGTGCAAGTATAGAGGTGTTAGGCAGAGGACATGGGGTAAATGGGTTGCTGAGATTAGGGAGCCACATAGAGGGAGAAGGCTTTGGTTGGGTACATTTGACACAGCAATTGAGGCTGCTCTTGCTTATGATGAAGCTGCAAGGGCAATGTATGGTCCTTGT…
StDREB30	ATGGCAGCTATGGATTTTTGGAATAGTACATCTGTAGATTTTCAATCATCATCAGAACCTATTACTTCTGGTGGTGAATTAATGGAAGCTCTTGAACCTTTTATGAAAAGTGCTTCTTCTTCTCCTTCTCCTCCCCCTTCTACTTTTCCTCCTGTTTTCCCTTCTTCTTCTTCTTCAACTTTTCCTTCTTCAGATTTCCAATCTTATCCTTCATTTCCTCCTCCAACTCCTACCCTTTCATATCCCTACACTTCTTCTTTTTACCCATCTTCTCAATCTACTATGAGCTCTGAGGTTTGTTCCACTTCCACAGAGATGAATTCCCAAATCTTTTCAACTCGGTTTTCTGGGTATGGAATGGAGCAACAGGGTTCAATTGGGTTGAATCAGTTAACCCCA…
StDREB31	ATGGATTTTTATGTTAACAGGAAACTGAAAAGAAGGCGTAATGGATCTGATTCCATAGATGAGATTTTATTAAGATGGAGAAATTTTAATCCGGAGGTTAATTCGAACAATGAACAAGTGAAGAAGAAGAAGAGAAAATCTCCGGGTAATGGATCAAACAAAGGTTGTATGCCAGGCAAAGGCGGTCCTGAGAATTCGGGTTGTAAATACAGAGGAGTAAGGCAGAGGACTTGGGGTAAATGGGTGGCTGAAATTCGCGAACCTGTTTATATTAGTGGTGAGTTTAAGAGCAAAGGGAAGCGGCTTTGGCTCGGTACTTACTCGACTGCTGGTGACGCTGCTATTGCTTATGATGAAGCTGCTAAGGTTATGTATGGATCCAATGCCATACTTAATTTC…
StDREB32	ATGGAAGATGATCAAGAAAGTAAGAATAATATCGACATGTATAGAGGAGTAAGGAAGAGAAAATGGGGGAAATGGGTGTCTGAGATACGCGAACCAGGAAAGAAAACTCGAATATGGTTGGGGAGCTATGAGACAGCAGAAATGGCTGCTGCAGCTTATGATGTTGCTGCATTTCATCTAAAAGGTGAGAGACCAAACTTAAGGCTCAATTTCCCTGAATTAATACATACATTCCCAAAACCCTCAAGTTCAAGACCTGAAGATGTACAAATGGCAGCTCATGAAGCGGCAATGAGGTTCAAACGGCCAATTGATGATCATCCAGACAACTGTGGTGCAGGCCCGGTGAGAGTAGGTCTCTCACCTAGTCAAATTCAGGCGATTAATGAATCCCCGTTG…
StDREB33	ATGGAGATAGGTGGTGGGGGTCAAAGTGGAGTTGCTGCAAGTTCAGGGGTTTGTTGTGGTGGGAAGAGAAAGAACGAAAGGCCATACAAAGGGATTCGTATGAGGAAGTGGGGAAAATGGGTGGCAGAAATTAGAGAACCCAACAAGCGTTCGAGGATCTGGTTGGGTTCGTATTCAACGCCGGTGGCGGCGGCGCGGGCTTATGATACGGCGGTGTATTATCTAAGAGGGCCTTCGGCCCGATTGAATTTTCCTGAGTTGTTAGTTGGTGATGGTGGGCTTAATGATTTGTCTGCTGCTTCAATTCGTAAAAAAGCCATAGAAGTTGGTGCTCAAGTTGATGCTGTACAGAACTCGCTTGCAACCCATCATAACCATACAGAAGAAAAGGTGCACTGT…
StDREB34	ATGACTGACCCTTCACATGCTACAAAGTCAAGAACAAATACCAAACATCCTATATACCGTGGTATACGATGTAGAAGTGGGAAATGGGTGTGTGAAATTAGAGAGCCACGTAAGACAACAAGAATATGGTTAGGCACTTACCCTACACCACAAATGGCTGCTGCTGCCTATGATGTTGCTGCCTTAGCTCTTAAGGGAACTCAAAATGTTGTACTCAATTTTCCTCATCTTGTTGATTCATATCCAAAGCTCCCTCCCTCACCATCTCCGGCCGATATACAACGTGCCGCGGCCACAGCGGCTGGGGCAATGGCCTCGCTAGGCGACGATGATGATCGGTCATTGGAAAGTAGGGATGGGGCTATATGTAACGAAAGGGGTTCAACTGAATTTCCTTCA…
StDREB35	ATGGTGAAACCCAATTCAAAAGATACTGAATTTTCACCTTCATCGTCATCGTCATCTTTGTATCGGGGAGTAAGGAAGAGGAAATGGGGGAAATGGGTATCGGAAATTAGATTACCTAATAGTAGAGAAAGAATTTGGTTGGGTTCTTATGATACGCCGGAAAAAGCTGCTAAAGCATTCGACGCCGCACTTTTTTGTTTGCGGGGTAAAGGGGCTAATTTCAATTTCCCGGAAAATCCACCGGAGATTATGAACGGAAGGTCGATGACTCCGTCGGAGATTCAATCGGCGGCGGCACAGTTTGCGAATAATACAGAACCCGAGCTTATCCGGGTCGGACCGAGGGAGAATTCGGATCTTTCTTCTTCCTCATCGGAAATATTCCTGGCGGAATCGCCG…
StDREB36	ATGGCGGAACTTGTACAATCATCTCCCATTTCCGTGTCAAAAACAGAGGAACCAGAAGAGAAAGAGAAAGAGAAACGAATGGAAAAACGAAGAAGAGATGAATCTTACCCAGTATACAGAGGAGTTCGAATGCGAAGTTGGGGAAAATGGGTTTCTGAAATTCGACAACCGCGTAAGAAATCACGGATTTGGCTAGGTACTTATCCAACCCCTGAAATGGCTGCAAGAGCACATGACGTTGCTGCGCTTAGTATTAAAGGGAATTCAGCAATTCTCAATTTTCCTCAACTCGTTGAATCGTTGCCTCGTCCAGCTTCAATTTCACCTAGAGATGTTCAAGCTGCTGCTGCTAAAGCAGCTGCTATGGATGAACTAAATTCCTCTGTTTCTTCTTCTTCG…
StDREB37	ATGGTGCGGCCTAAAGTAAGCAAAGAGAAAAAAGTGAAAGGGGATCGTTACAAGGGTGTGCGTATGAGAAAATGGGGAAAATGGGTAGCTGAAGTACGGCAACCGAAAAGCCGTGACAGAATATGGTTAGGCTCTTACGATACGGCGGAAGAAGCGGCTAGAGCTTATGATGCAGCGGTGGTTTGCTTGCGTGGATCGTCCGCGATGATTAATTTCCCGGACGATCCACCGGTTATTTCGTGTGATGGTGATCATAAGTTGTTGTCACCTTCGGAAATTCAAGTTGAGGCATCGAGACATGCACGTAGTACTAGAGAAGAGTCTGCTGCAGCTGCTGATGATGCCGTAGACCACGGCAGATCAGCAGCTGTGGAGAGTGTGTTTTTTAGAGATGATTTG…
StDREB38	ATGGTGAAGACAGAGCAAAAAAGTTTAGTAGAGCCAAACAAGAAATCAATGTCAATATCATCATCATCTTCTTCAACATCAAGCAATATCAATAACATGAAGATGAAGAAGAATAAGTACAAAGGAGTTAGAATGAGAAGCTGGGGATCATGGGTATCAGAAATAAGAGCACCAAATCAAAAAACAAGAATCTGGTTAGGTTCCTATTCTACCCCTGAAGCTGCTGCTAGAGCTTATGATGCTGCACTTTTATGCCTAAAAGGCCCTTCTGCTTCTTCAAATCTCAACTTTCCTTTTGACTCTTCTTTCTATCACCACATTGATCATCACACTTCTACAACACTCTCTCCTAAAGCCATTCAGAGAGTGGCCGCGGCAGCCGCGGCCACTCCTGAACAA…
StDREB39	ATGGCTAGAGCACAACAAAGATATAGAGGAGTTCGACAGAGACATTGGGGTTCTTGGGTCTCCGAAATTCGCCATCCATTACTGTAAGTCATATTCTCTATTGAGATATCGTATCGTATGTCACACTGATCACACTCATTGTTTTCGACTTGAACTTTATAAATATAATAATGAAATATATGTGTCAAGTTCACCTCAGTTGTTGTAAAAATATGTGGAAACAGTGACACGTTAGAGGCGGATCTAGAGTAAAACATATGGGGTCATGAAACCAGTAGTTGTTGCCTAGACTTACATGCATTTTAAGAAATTACTTGACTTTAAACTATAAGTTATTTTTGTATATTAATTTAAGGTCAATGGAGGAATCATAAACTTCAAATTCTAAATATCTGTCTC…
StDREB40	ATGTCTCGACCACAACAAAGATATCGAGGTGTTCGCCAGCGGCATTGGGGATCTTGGGTTTCCGAAATTCGTCATCCTTCATTGTAATTCTTCTCCCTCTTATCTCTCTTTCTTACACTTTGTTTCATCAATCAGGAGCAGAGCTAGCTTAGAGTTTACGAGTCCGGCCAAATTTGGTAGCTTTAGTAACAACTTTATATTTGTTCTGATAGTCAAACTTAATGATCATGGTTATTGGGAATCTTAGTAGATCAGTTAGTTGGTTGATTACCTAAAACTTTCATACTATTGGTGAAGGTTCGATTTCCCATATTGTAATCCCCTCTACATTCCTCCTTGCCCTATCCCCAATCAGTGGCGGATCGAAGCTAGAATTTTTAATAAGGGGTTTAAAATTTG…
StDREB41	ATGGCAGCAGCTATAGATATATACAGCAGCAGTAACTTCTCAGATCCTTTAACAGAAGAACTTATGAAAGCACTTGAACCTTTTATGAAAGGTGCTTCTTGTTCTTCTTTTTCTTCATCTTCACCTTCTTCTTCTTCTTCTTCTTCTTTCTATACTTTTGGTGAGCCTAATTTGTATACTGATTTCTGTGCAATCCCATCAACGGCTACCCAAATGTTTTCTCAAGGGTATTCGTGTTTTAACAATATGGGTGTAGCTGAAACAGGTTCAATTGGGCTTAACCATCTAACCCCTTCTCAGATATTGCAAATCCAAGCTCAGATCCAATTCCAGAATCAACAGCAACTACTACAACTGCATCAACAACAACAGAGCTTAGGTTTGTTAACACCTACTTCA…
StDREB42	ATGGAAAATATTGAATCGATTGATAATGTTCAATCCATTATGTCAATGTATAGACCTTTAAAAAAGCTCAAAATTAACCCATCATCACAACATAATAGCCTTCGATCAAGTGGAGACGGGGTGGAGCCTGTAGCTCAGAGGATTAGAGCACGTGGCTACGAACCACAGTTTCGTTTTCCTTTTGCTCTAGATGATCCTCCATCAAGTAATTGTCACCTTAATTGGCAATCACTTACTCAAAATCAAACTATGATTTCTTTTGCACCTCAAAGTTGCTTTAATCAGTGTCGAATCACTGACAATGGGACGAGGACGACTACAATGATGAATGTTTATGGCACTGTCTCCTCCCCTGTACCTAAACAGTACAGGGGAGTGAGACAACGCCACTGGGGGAAA…
StDREB43	ATGTCAATGTATAGACCTTTGAAAAAGCTCAAAATTAGCCCATCATCACAACATAATAACCTTAGATCAAGTGGAGACGGGGTGGAGCCTGTAGCTCAGAGGATTAGAGCACATGGCTACGAATCACAGTTTCCTTTTCCTTTTGCTCTAGATGATCCTCCATCAAGTAATTGTCACATTAATTGGCAATCACTTACTCAAAACCAAACTATGATTTCTTTTGCACCTCAAAGTTGCTTTAATCAGTGTCGAATCACTAACAGTGGGACGAGGACGACTACGATGATGAATGTTTATGGCACTGTCTCCTCCCCTGCACCTAAACGGTACAGGGGAGTGAGACAACGCCACTGGGGGAAATGGGTAGCAGAGATTCGCCTTCCTCGTGAAAGAACTAGA…
StDREB44	ATGGCAACTTCTACAAAGGATTTTTGGACTACTACTCTTTTAGATCTTAACTCATCAAATTCTGGTGGTGAGCTTATGGAAGCACTTGCACCTTTTATTAAAAGTGCTTCTTCTCCTTCTCCTTCTCCTTCTGTTTCTCCATACTTTGATTTACAATCTTCTTCTCTATCAACTTCATATCTTTACGAATCATTTTCTTCAACGAGTCAACCTAATATGAGCTACTATGATAATGGTTGCTCCACTTCCAGCACGATAACCCCTACTTTTTCACAGGGGTTTTCGGGCATTATGGAAGCGGAGCAACCAGGCTCAATTTGGCTGAACCAAGCCCAAATCTATCTGCCACAGCAAATTATGCCAGCTGTCACTTTCCAGAATAATAATCAGTATGTTTCT…
StDREB45	ATGTCTTCATCAATAGGTCATGAGAGCCAAATTCATTATCAAGAGGCTGCAACTACAAATCCAACAAATTGGCTGAAAATGAATCAAACCATAACAAATTGTACCACAACAAAAGGTTTTAGTGACTATTGGCTTAGCACTACAAAAACTCAACCAATGAAATTCAAAGGATCATCAAGAAAATCATCACTTATTCATTATGAAAATTCGCCTTCATCTTCTTCTTCTTCTCCTTCTTCTATGACCGCGTCCCAAGGGAAGCTTTTTCGAGGAGTAAGACAAAGGCATTGGGGAAAATGGGTGGCGGAAATAAGGCTACCAAGAAATAGGACAAGGGTTTGGTTAGGTACATTCGATACTGCTGAAGAAGCTGCTTTTGCTTATGATACCGCGGCTTAT…
StDREB46	ATGGAAGATCATAATGAATTCTCCATCTCTAGTTCTACTACAACTTCATCATTTACAAGTTGTTGTTCTAATAACAATTGTTTAAGTTCTACTTCAACTTCTTCTACTTCATCTAATTGTTTCCATGAGAGCATTGCAAAAACCTCACCAAATGATCATTACAAGTGCAAATCCAAGAAAAGTTCAAAAAAAATTCAAGATGGGAATGAGGAGGAGGATGATAACAAGAAAATCAGACGAAAAAATGAAGGTGTTGTTGATGAAAAACATCCGACTTATAGAGGAGTTCGTAAGAGGAATTGGGGAAAATGGGTGTCCGAAATTAGACAACCAAGGAAAAAATCAAGAATTTGGCTAGGGACTTATCCCACAGCTGAAATGGCAGCTCGAGCTCATGAT…
StDREB47	ATGGCGGAACCAGAGGAACAAATGGAATTTGATGATAATACTTTTGAAAGACAACAAAGGAGGCCAGTTTTTGAAGAAGCTTCCATGTCTAATAGGCGTTTCAAAAAGATCAAAAGTCCGGAACGCCAATCCTCTGTTCAGCAGCCGTCTTTAAATTCATTTGTTCCTTGTAATAATCCAACATCAATGCCATTTCCTCCACCTCCGTCATCGTCAAGGCTTGTTTTTCCTTTTGCCTTTGATGGGACACAGCAATCCATGGATAGTTCATCCCAATTGGGAACGAACGCGATGCCTCTGTTTCATCCACAGCAGCAAAATCAGCAGCAAATGATCTCATTTTCGCCTCAACAATGTCTTTACCCTCCGTATTTTGCAGGGGATTTGGGTCCATCACAG…
StDREB48	ATGGCTGATTATCATTTTAACGTTTCCCCAAATGACAATTCTCCTCCTTTAGAAAATCTTTCACCCACTGGGGGCACCTTATTATCACCTCGTAGGCATCCGAATTTCAGAGGAATTCGACAGAGGAATGGGAAATGGGTCTCCGAAATTCGTGAGCCTCGAAAGACTACACGTATATGGTTAGGAACTTTCCCCAATCCCGAAATGGCAGCTGTCGCTTATGACGTTGCAGCTTTGGCATTAAAAGGCCCTGATGCCCAATTAAACTTTCCTGATTGTGCATACTCGTACCCTATCCCTGCTTCTCTGTCAGCCGCAGATATTCGTGCTGCGGCTGCAAATGCTGCTGCTGCTAGAGCACCTCCTTTGTCAGAATTCAGTACAGCTGGAGGTACTGCA…
StDREB49	ATGGACAGAAATCAAGAAAACAACTCTATGACTACCATATTTGATGAGGCTGCTAGAATTCGATCTTCGTTATCTCAACTAATTCTAACAAGTGGTACAAACACATTCGATACGATTTTTTCTCATTGCCAAGAAAATAACCAAATGACTAATAGTCCTGTTTTTGAGCCTTTAGGTACTTCAGTCTACCTCAGACAAAGAGATTTGCTACACAAATTCTGTCAAGAAAACATAGCAAATATCCCAATACCAACAACTTCCAAAACAATCCCTTTTCGAAACTCTTTGTATACACAGAGTTACAAGTTTCCAGAGAAGAAAAAACTATACAGAGGAGTAAGACAGAGGCATTGGGGAAAATGGGTTGCTGAGATAAGACTTCCACAGAATAGAATGAGA…
StDREB50	ATGGGTGAGCGTTTTGTTGTCTTGCCACATGTTGTACGTATTTACATAACAGACAATGACGCAACAAACTCGTCCAGTGATGAGGAAGAAAATCTTCAAGGAGAGATGTCCAAACGACATAAAAGGATTTGTAAAGAGATTATCATCAGAAATGGAAAAACCAATGTCACTTCCAAGATGGTATCGTCCAAAGAAAAAACAGACACAAAACTTCTCCAAGAAAATGTAAAGAATTACAGGGGAGTTAGACAACGAAAATGGGGAAGATGGGTTGCAGAGATTCGAGATGTAAGAATGAATAAACGACGTTGGTTGGGAAGTTTTGACACTGCGCTAGAAGCTGCTTTGGCTTATGACAAGGCAACCATTGAATTAAAAGGTGCTAATGCTGTGAAGGAA…
StDREB51	ATGATGAATGTTTATGGCACTGTCTCACAACGCCATTGGGGAAAATGGGTAGCAGAGATTCGCCTTCCTCGTAAAAGAACTAGACTTTTGTTAGGCACGTTTGGAAGTACTGAAGAAGCTGCTTTTGCTTACGATGTCGAGGCCTCTAGGCTCAGAGGAACAGATGCACGTCTTAATTTCCCACATCTGGTTTTGGCCTTTGATATGTTCAATTCTTGA
StDREB52	ATGGTACAGGCAAAGAAGTTTAGAGGTGTCAGGCAACGCCATTGGGGTTCTTGGGTTGCTGAAATTCGTCATCCTTTGCTGTACTTTACCATGCACACTCCACTCCATCTCTTTACTTTGTTTTTAATTTCATATCGCTCTATATATTGATTGATCATCAGATCATGATCAAAGATGAATTTTGAATTTAAATTTGATGATTTTTATTTATTGAATAATTATTATGTTTTTGCTCGTAGGAAGAGGAGAGTGTGGCTAGGAACTTTTGAAACTGCGGAGGAAGCTGCCCGAGCGTATGATGAGGCTGCGGTTTTAATGAGCGGACGTAACGCCAAAACAAATTTCCCAGTGCAGGCTACTGATGAAAATAAAAAAGACAACTCTAAATCTAATAATTCG…
StDREB53	ATGAGTTCAGGTGCAAAATACAGAGGGATTCGGAGGAGAAAATGGGGGAAATGGGTGTCGGAAATTCGAGTTCCAGGTAGTAGTGAACGGCTTTGGCTAGGTACTTACACTAGCCCTGAAGCTGCAGCTATAGCACATGACATTGCCTATTATTGTCTCCGTCCAGAATCATCGTCTTTACATAAATTAAACTTCCCTTCCATGTTACCGCCTAATGTTCAACCTGGAATGTCACCAACATCTGTACAAAAAGTTGCCTCTGATGCTGCCATGGCTATTGATGCTCAGTTTCTTACAATACCAACACCTGCTCAACAACATCGTCAAACTGCTGATAATTATGGGCAAAATCAAGGTCTCAACATTTCTGTTGAAGATTATCAATATTGA
StDREB54	ATGGAAGCCAACCCTACTCATGATCAGCCAAAGTTCAAAGGAGTTCGGTTGAGAAAATGGGGGAAATGGGTTTCTGAAGTCAGATTGCCTAATAGCCGCGACAGGATTTGGTTGGGCTCATACGATTCTGCTGAGAAAGCCGCAAGGGCTTTTGATGCTGCACAGTTCTGCCTCCGCGGGCCGAAAGCTAAGTTTAATTTCCCTGATAGTCCGCCGGATATATCCGGTGGACAAAGGCTTTCCCCCGCAGAGATACAGGCTGTAGCAGCTAGATTTGCGAATGATTACTCGCCGTCAGTGGTACAGGAGATACAGCGTGATGACCATGAGGGCAATATTGGAAATATTAATTCACACGTGATAAATATGGAAAAAGATGAGATTTCGCTATCAACAACT…
StDREB55	ATGTCTTACACATATGATGAGGCTGCTCAAATTAGATCTTCTTTATCTCAAATCCTATTAACAAGTAGTACCAACACTTTAGACTCAATATTTTTTCATTGCCAAGAACCAAAAAATCAAATGACTACTACTAGTCCTGTTCTTGAACCACTATGTTCTTCAGTCTATCTCAGACAAAAAGATTTGCTCCAAAATTTTTGGGAACAAAACAGAACAAATATCACAATTCCAACAACTTCCACACAAACCCCACTTCAAGAATCATTATACTCACAAAGATATGTTAGTCCAAACAAGAAAAAGTTATATAGAGGAGTGAGACAAAGGCATTGGGGAAAATGGGTGGCTGAAATAAGACTTCCTCAGAAGAGAATGAGAGTTTGGCTTGGAACTTATGAC…
StDREB56	ATGAGAGGTCCTGATGCTGTGACAAACATCCTTAAGCCACCACCAAGAGAGGTACAACCAATGGAAAACAACCTCATCAACCCACCGCCAAAGGAGATCAATTTTATGAATCTTTCATCTTCATCCTCAAATGATGCTAGGGTTTGAGAAATGATTTGCTCTATTTTGTTGTACTTTCTTTAAGTTATATTAATCAAATTTAACAAACTCCCTACTTATTGGGATGCCCCCCGCCCCCCTCCCTAAATTTAGTATGCACTATGACATCTTTACTAGACTCTGACTAAATATATTCTTGTGAAGGTTCATGTTAATTAAGTGTTATTATTGAGGTTTCATTAGACAACAAGTTCTCACAACCACAAACAAGAATTTCCATCACATATACTGGTAAGAGAC…
StDREB57	ATGAATAACGACTCGAGTTTGTACTCGTCAGATCTCAACCCATTAAGTGCAACAATAGCTTCCGATGAGGAAGGAATACTATTACTAGCTTCAAGCCGACCCAAGAAACGTGCAGGGAGGAAGAAGTTCAAGGAAACTCGCCACCCGATTTATAGGGGAGTGAGGAGGAGGAATAATAGCAAGTGGGTTTGCGAGCTACGTGAGCCTAGTCAACAGAAAAGAATATGGCTAGGGACTTACTCTACTCCTGAAATGGCGGCTCGAGCTCATGATGTTGCTGCATTAGCTCTTAGAGGTAATCTAGCCACTCTGAACTTTGCTGACTCTCGTTGGCGATTGCCAGTGCCCGCATCAAAGGACCCCAAGGACATACGACAGGCGGCAGTTATAGCCGCACAA…
StDREB58	ATGGCGGCTAGAGCTCATGACGTGGCAGCTTTAGCATTAAGAGGCCGTTCTGCTTGCTTGAATTTCGCTGATTCTGCTTGGAGGTTGCCTATCCCTGCTTCCTCCAACTCTAAGGATATTCAAAAGGCGGCCGCTGAGGCCGCCGAAATCTTCCGACCATCAGAAGAGTCGGAAAGAGTTGCAAGTTCTGAAATGCATGAGAGTATATTTTTTATGAACGATGAAGGACGAGAGAGTAGTTTCTTCATGGATGAGGAAGCGTTGTTCGACATGCCGGGATTAATTGCGAATATGGCGGAAGGACTAATGCTACCTCCACCGCAATGTGCAGAAGTAGAAGATCATTATTATATGGAAGCTGATGATGCTTACATGCCTTTATGGAATTATTAG
StDREB59	ATGGCGGCTAGAGCTCATGACGTGGCGGCTATAGCATTAAGAGGAGGTTCTGCATGTTTGAATTTCGCTGACTCTGCTTGGAGGTTGCCTACCCCGGCTTCCTCTGACACTAAGGATATTCAAAAGGCGGCCGCTGAGGCCGCCGAATCCTTCCGACCATTGAAGTCGGAAGAAGAATCAGTAGTTAGTACTGGAGATCAATCTAGTACTCCGGATAATATGTTTTTTATGGATGAGGAAGCGCTGTTCTGCATGCCGGGATTACTTACGAATATGGCGGAAGGATTAATGGTACCTCCACCTCAATGTACTGAAATGGGAGATCATGTGGAAGCTGATGATATGCCTCTATGGAGCTATTCTATCTAA
StDREB60	ATGGCCAACCTTTCACATACTAGTGGTCAATTAGTACCAAACATTCTAGTTGACAACAAAAAAAGTGCAAGAACAAATACCAAACATCCTATATACCGTGGTATACGTTGTAGAAGTGGAAAATGGGTGTGTGAAATTAGAGAGCCACGTAAAACAACAAGAATATGGTTAGGTACATACCCTACTCCACAAACGGCTGCTGCTGCCTATGATGTTGCTGCCTTAGCTCTTAAGGGTACTCAGAATATTGTACTCAATTTTCCTCATCTTGTCAATTCTTATCCAAAGCTCCCTCCCTCACCATCTCCGGACAATATACGTTGCGCCGCGGCCACAGCGGCAACGATGATGGCTCAACGAGGTGACGATGGTCGGTCGTCGGGAAGCAAGACAACAGCT…
StDREB61	ATGAAGCCACCAGTACCTCAGCCAAGTGACGGTATTAGAACACGAAGAAAACCATCATCAAGGGGCCATCCAAGATTTGTTGGTGTTCGCCAAAGGCCATCAGGAAGATGGGTTGCAGAGATCAAAGATTCTTTACAAAAGGTGAGGCTATGGCTTGGTACTTTTGACACTGCTGAGGATGCTGCAAGGGCATATGATCAAGCTGCTCGCACATTAAGAGGGGCTAATGCTCGTACTAATTTTGAACTACCCGCGTCTGATTCCCACCAAGGTAGTAGTATTCTTGAAAATTCTGTGCCTTTTAACTTTGAAGAAGCCTGCAGAACAGAGGAACCTGAAAATAGTCTTGTTGGTGCACTTAAAGCTAAACTCTTTAACAGCAAGAATTCAAGATCTTTC…
StDREB62	ATGAAAACCACCATCACAACCAACACCAACACCACCAAATCATCATCAACACAACCAAAGAAATCATCAATAACAAGAAAATTTGTAGGTGTAAGACAAAGACCCTCTGGAAGATGGGTTGCTGAGATAAAGGACTCGTCTCAACGTGTGAGATTATGGCTAGGAACATACGATACTGCTGAAGAAGCTGCTCATGCCTACGATGAAGCTGCCCGAGCCCTACGAGGCGAAAATGCACGAACCAACTTCGCTTCTACTGCTCCAAATTCCGATATGGATCAATCGCATAGTTCACATGATACTAAACATGGTCTTAGCTTTTCTTCTATAAAAGAGAAATTAAGTAAGAACTTACAAAGCATCATGGCTAGGAATTCAGAAAATAAGTCTTCTTCATCG…
StDREB63	ATGAATAGCACCAGTGCAGGTAGTAATAATGATCAACATCCCCACCCTACCCAAGACTTAGACCTCACCAACCAAGAAGATAAAACAACTACTGCTTCTCTCACCACACAAACCAGCAGTGAAGAGAATAGTTCAAGTAGGAACAAGAAAGGTAGTAAAGGCAAAGGAGGACCTGATAACAACAAATTCAGGTATCGAGGAGTTAGACAACGCAGCTGGGGCAAGTGGGTCGCTGAGATCCGTGAGCCCCGTAAACGGACTCGCCGTTGGCTCGGTACTTTCGCCACTGCTGAAGATGCTGCTCGAGCTTATGACCGTGCCGCTATTATACTCTACGGTTCAAAGGCTCAGCTCAATCTTCAACCTTCAGGTGCAAACGCTACTAGTTCATCATCAAAT…
StDREB64	ATGAATAGCACCAGTGCAGGTAGTGATAATCCCCACCCTACCCAAGACATTAACCACCAAGAAAAATCCACCAGTGAGGAGAAAAGCAACAAGAAAGGTAGTAAAGGCAAAGGAGGACCTGATAACAACAAATTCAGGTATCGAGGAGTTAGACAACGCAGCTGGGGCAAGTGGGTAGCTGAGATCCGAGAGCCCCGTAAACGGACACGCCGTTGGCTCGGTACTTTCGCCACTGCTGAAGATGCTGCTCGAGCTTATGACCGTGCCGCTATTATACTCTACGGTTCAAAGGCTCAGCTCAATCTTCAACCTTCAGGTGCAAACGCTAGTAGTTCATCATCAAATTCTTCTAAACGCGGATCTACATCTTCTACTACACAAACTCTTCGTCCTTTACTT…
StDREB65	ATGACATCCAAGAATAAGTATCACGAAAAGAAGGTCATTAGAAAACCCTCAAAAAATGATGCCACTAAAAATTCAACTGTTCAAGTAGAAGGAAGTTCTTCTATCCAACCCAACCCTGCAAGAGTTTACTTGTGGGGTGTCGATCTGATGAATCTATCTAATCATGAGGATAAAGGGAAGGTCAAGGAAGAGAAGTCAAAGGGACGTGATAAGACACGTCAAAAGAAAATCTTCAGTGAGAATGAAAATGTCAAGGCAATTTCAATTGAAAATTCAAAAGAGAAACCACAAGAAAATGTGGAAAAGTATAAAGGGGTTAGGCAGAGAAAATGGGGAAAGTGGGTTGCAGAGGTATATGACCCAAGAACGAAAGGCCGAATTTGGTTAGGGACATTTAAC…
StDREB66	ATGGAAAACTCAAAATCCTCATCAGAGTCCTTAAATAACTCATCCAAAAACATCCAACAAAATAAGCCAATTTCCTCAAATGATGGAAAGAAATTTATTGGAGTTAGACAAAGGCCATCAGGCAGATGGGTTGCTGAAATCAAAGAAACTTCACAAAAACTCAGGCTATGGCTTGGTACTTTTGACAAAGCAGAGGAAGCTGCTCTGGCTTATGATAGTGCTGCACGTCTTCTTCGAGGAAGAAACGCGAAAACAAATTTCAAGAACCAGGGAATCTTGAAACCAAATGAAGAGAATTGCAGTTTGTTGGAAAAAAATCCAAGATTATATCAACTTATGAAACATGCCATCATGAAGAAACTTGCAGGGAAATATCAAAATAATGAACGTTTAGAAACA…
