# Supplementary material for: Genome-wide analysis, identification, evolution and genomic organization of dehydration responsive element-binding (DREB) gene family in Solanum tuberosum
Source: PeerJ. 2021 Jun 24;9:e11647. doi: 10.7717/peerj.11647 (PMC8236231; doi:10.7717/peerj.11647)
Supplement: Supplemental Information 5 [file peerj-09-11647-s005.xlsx]

## Sheet: Sheet1
Detailed information of motifs found in StDREBs
Pattern	Sequence	Motif width	Log likelihood ratio	Site-count	E-value
Motif 1	RIWLGTFPTAEMAARAYDVAA	21	2968	63	7.6e-942
Motif 2	WGKWVAEIREPRK	13	1894	63	5.1e-553
Motif 3	KHPKYRGVRQR	11	1371	63	7.0e-339
Motif 4	LRGPSARLNFP	11	1268	66	1.2e-288
Motif 5	SAWRLPRPASSSPKDIQAAAAKAAAAFRP	29	1372	32	9.3e-266
Motif 6	EEFMDEEALFDMPGLJVNMAEGLMLPPPQC	30	836	12	3.5e-173
Motif 7	LLLASKNPKKRAGRKKFKET	20	420	10	3.1e-50
Motif 8	KKSPAKGSNKGCMRGKGGPEN	21	399	9	3e-48
Motif 9	SPRSDNDDPFFDLPDLSIDLVDQFDKYCYPISTWQLAGAV	40	451	5	1.3e-38
Motif 10	GGDFGEYNPLHSSVDAKJQAICQSLARGKSKDAKKK	36	402	5	7e-32
Motif 11	NCHJNWQSLTQNQTMISFAPQSCFNQCRITDNGTRTTTMMNVYGTV	46	282	2	1.6e-26
Motif 12	DDDMSLWSY	9	349	21	2e-26
Motif 13	CNGGEDNDMLEGEGWQEKMAEGLLFSPTPRLGSCFSWDDVE	41	325	3	2e-24
Motif 14	WKGLLQLTPFGNYQIQADDNFQNQQQQCDFTITDPGFG	38	362	4	8.3e-24
Motif 15	NNYJPYGFYPAVQYAEDISQNPQHSIQKQTFDDNYGFLDGETTKASGMIW	50	297	2	2.4e-22
