# Supplementary material for: Genome-wide analysis, identification, evolution and genomic organization of dehydration responsive element-binding (DREB) gene family in Solanum tuberosum
Source: PeerJ. 2021 Jun 24;9:e11647. doi: 10.7717/peerj.11647 (PMC8236231; doi:10.7717/peerj.11647)
Supplement: Supplemental Information 6 [file peerj-09-11647-s006.xlsx]

## Sheet: Sheet1
Gene Duplication (Ka/Ks values)
Gene 1	Gene 2	Ka	Ks	Ka/Ks Ratio	Time (MYA)	Type of Selection	Type of duplication	T=Ks/2x	x=6.56*10^-9
StDREB3	StDREB59	0.0106196	0.105205	0.100942	8.01867	Purification selection	Tandem		Million years=10^-6
StDREB6	StDREB58	0.0794052	0.13584	0.58455	10.3537	Purification selection	Tandem
StDREB23	StDREB57	0.0504549	0.251062	0.200966	19.1358	Purification selection	Tandem
StDREB34	StDREB60	0.140212	0.307183	0.456445	23.4133	Purification selection	Tandem
StDREB11	StDREB28	0.0452012	0.151502	0.298354	11.5474	Purification selection	Tandem
StDREB22	StDREB24	0.262842	1.19702	0.21958	91.2364	Purification selection	Segmental
StDREB26	StDREB32	0.379365	2.92677	0.129619	223.077	Purification selection	Tandem
StDREB25	StDREB33	0.16446	3.0989	0.0530705	236.197	Purification selection	Segmental
StDREB49	StDREB55	0.200503	0.546109	0.367148	41.6242	Purification selection	Segmental
StDREB30	StDREB44	0.274664	1.12048	0.245131	85.4022	Purification selection	Segmental
StDREB42	StDREB43	0.0425372	0.0807742	0.526618	6.15657	Purification selection	Tandem
StDREB63	StDREB64	0.032559	0.083747	0.388778	6.38316	Purification selection	Tandem
StDREB9	StDREB29	0.261323	0.859238	0.304134	65.4907	Purification selection	Segmental
StDREB13	StDREB31	0.0659024	0.120257	0.548013	9.16593	Purification selection	Tandem
StDREB56	StDREB65	0.202872	0.324257	0.625651	24.7147	Purification selection	Tandem
StDREB62	StDREB66	0.495596	1.99133	0.248877	151.778	Purification selection	Segmental
StDREB39	StDREB40	0.28601	1.57749	0.181307	120.235	Purification selection	Segmental
StDREB50	StDREB52	1.13376	2.12762	0.532877	162.166	Purification selection	Segmental

## Sheet: Sheet2
StDREB3	StDREB59
StDREB6	StDREB58
StDREB23	StDREB57
StDREB34	StDREB60
StDREB11	StDREB28
StDREB26	StDREB32
StDREB42	StDREB43
StDREB63	StDREB64
StDREB13	StDREB31
StDREB56	StDREB65
