# Supplementary material for: Genome-wide analysis, identification, evolution and genomic organization of dehydration responsive element-binding (DREB) gene family in Solanum tuberosum
Source: PeerJ. 2021 Jun 24;9:e11647. doi: 10.7717/peerj.11647 (PMC8236231; doi:10.7717/peerj.11647)
Supplement: Supplemental Information 7 [file peerj-09-11647-s007.xlsx]

## Sheet: Sheet1
Orthologous gene pairs between S. tuberosum and A. thaliana
Gene name	Gene ID of S.tuberosum	Chr ID of S.tuberosum	Syntenic with	Chr ID of A.thaliana	Gene ID of A.thaliana
StDREB33	PGSC0003DMT400010228.v4.03	Chr02	==	AT2G23340.1.TAIR10	Chr2
StDREB33	PGSC0003DMT400010228.v4.03	Chr02	==	AT3G50260.1.TAIR10	Chr3
StDREB33	PGSC0003DMT400010228.v4.03	Chr02	==	AT4G36900.1.TAIR10	Chr4
StDREB33	PGSC0003DMT400010228.v4.03	Chr02	==	AT5G67190.1.TAIR10	Chr5
StDREB46	PGSC0003DMT400066977.v4.03	Chr01	==	AT2G44940.1.TAIR10	Chr2
StDREB46	PGSC0003DMT400066977.v4.03	Chr01	==	AT3G60490.1.TAIR10	Chr3
StDREB44	PGSC0003DMT400022023.v4.03	Chr12	==	AT1G22190.1.TAIR10	Chr1
StDREB44	PGSC0003DMT400022023.v4.03	Chr12	==	AT1G78080.1.TAIR10	Chr1
StDREB14	PGSC0003DMT400010876.v4.03	Chr12	==	AT1G63030.1.TAIR10	Chr1
StDREB35	PGSC0003DMT400007511.v4.03	Chr12	==	AT1G19210.1.TAIR10	Chr1
StDREB36	PGSC0003DMT400068040.v4.03	Chr12	==	AT3G16280.1.TAIR10	Chr3
StDREB10	PGSC0003DMT400009506.v4.03	Chr4	==	AT1G75490.1.TAIR10	Chr1
StDREB30	PGSC0003DMT400024508.v4.03	Chr4	==	AT1G78080.1.TAIR10	Chr1
StDREB30	PGSC0003DMT400024508.v4.03	Chr4	==	AT1G22190.1.TAIR10	Chr1
StDREB41	PGSC0003DMT400053152.v4.03	Chr4	==	AT1G78080.1.TAIR10	Chr1
StDREB30	PGSC0003DMT400024508.v4.03	Chr4	==	AT1G36060.1.TAIR10	Chr1
StDREB12	PGSC0003DMT400020525.v4.03	Chr4	==	AT1G46768.1.TAIR10	Chr1
StDREB12	PGSC0003DMT400020525.v4.03	Chr4	==	AT2G23340.1.TAIR10	Chr2
StDREB41	PGSC0003DMT400053152.v4.03	Chr4	==	AT2G22200.1.TAIR10	Chr2
StDREB12	PGSC0003DMT400020525.v4.03	Chr4	==	AT3G50260.1.TAIR10	Chr3
StDREB41	PGSC0003DMT400053152.v4.03	Chr4	==	AT4G39780.1.TAIR10	Chr4
StDREB41	PGSC0003DMT400053152.v4.03	Chr4	==	AT5G65130.1.TAIR10	Chr5
StDREB12	PGSC0003DMT400020525.v4.03	Chr4	==	AT5G67190.1.TAIR10	Chr5
StDREB52	PGSC0003DMT400001703.v4.03	Chr3	==	AT1G15360.1.TAIR10	Chr1
StDREB64	PGSC0003DMT400085168.v4.03	Chr3	==	AT2G40220.1.TAIR10	Chr2
StDREB25	PGSC0003DMT400084506.v4.03	Chr3	==	AT2G23340.1.TAIR10	Chr2
StDREB25	PGSC0003DMT400084506.v4.03	Chr3	==	AT3G50260.1.TAIR10	Chr3
StDREB58	PGSC0003DMT400037118.v4.03	Chr3	==	AT4G25470.1.TAIR10	Chr4
StDREB59	PGSC0003DMT400037118.v4.03	Chr3	==	AT5G51990.1.TAIR10	Chr5
StDREB27	PGSC0003DMT400006751.v4.03	Chr3	==	AT5G25810.1.TAIR10	Chr5
StDREB25	PGSC0003DMT400084506.v4.03	Chr3	==	AT5G67190.1.TAIR10	Chr5
StDREB38	PGSC0003DMT400002375.v4.03	Chr11	==	AT1G21910.1.TAIR10	Chr1
StDREB38	PGSC0003DMT400002375.v4.03	Chr11	==	AT1G77640.1.TAIR10	Chr1
StDREB20	PGSC0003DMT400047804.v4.03	Chr11	==	AT5G11590.1.TAIR10	Chr5
StDREB19	PGSC0003DMT400095471.v4.03	Chr10	==	AT2G36450.1.TAIR10	Chr2
StDREB31	PGSC0003DMT400041064.v4.03	Chr10	==	AT2G38340.1.TAIR10	Chr2
StDREB31	PGSC0003DMT400041064.v4.03	Chr10	==	AT2G40340.1.TAIR10	Chr2
StDREB15	PGSC0003DMT400060970.v4.03	Chr10	==	AT3G57600.1.TAIR10	Chr3
StDREB45	PGSC0003DMT400080372.v4.03	Chr9	==	AT4G13620.1.TAIR10	Chr4
StDREB9	PGSC0003DMT400061541.v4.03	Chr6	==	AT2G40340.1.TAIR10	Chr2
StDREB9	PGSC0003DMT400061541.v4.03	Chr6	==	AT3G11020.1.TAIR10	Chr3
StDREB48	PGSC0003DMT400065067.v4.03	Chr6	==	AT4G25470.1.TAIR10	Chr4
StDREB48	PGSC0003DMT400065067.v4.03	Chr6	==	AT5G52020.1.TAIR10	Chr5
StDREB9	PGSC0003DMT400061541.v4.03	Chr6	==	AT5G05410.1.TAIR10	Chr5
StDREB39	PGSC0003DMT400067218.v4.03	Chr6	==	AT5G25190.1.TAIR10	Chr5
StDREB16	PGSC0003DMT400018137.v4.03	Chr5	==	AT1G01250.1.TAIR10	Chr1
StDREB24	PGSC0003DMT400018079.v4.03	Chr5	==	AT2G44940.1.TAIR10	Chr2
StDREB29	PGSC0003DMT400069733.v4.03	Chr5	==	AT2G40340.1.TAIR10	Chr2
StDREB24	PGSC0003DMT400018079.v4.03	Chr5	==	AT3G60490.1.TAIR10	Chr3
StDREB29	PGSC0003DMT400069733.v4.03	Chr5	==	AT3G11020.1.TAIR10	Chr3
StDREB29	PGSC0003DMT400069733.v4.03	Chr5	==	AT5G05410.1.TAIR10	Chr5
StDREB49	PGSC0003DMT400031685.v4.03	Chr8	==	AT1G64380.1.TAIR10	Chr1
StDREB21	PGSC0003DMT400058587.v4.03	Chr8	==	AT1G12630.1.TAIR10	Chr1
StDREB55	PGSC0003DMT400014953.v4.03	Chr8	==	AT1G64380.1.TAIR10	Chr1
StDREB5	PGSC0003DMT400032623.v4.03	Chr8	==	AT1G12610.1.TAIR10	Chr1
StDREB60	PGSC0003DMT400032532.v4.03	Chr8	==	AT1G12630.1.TAIR10	Chr1
StDREB5	PGSC0003DMT400032623.v4.03	Chr8	==	AT1G63030.1.TAIR10	Chr1
StDREB11	PGSC0003DMT400012317.v4.03	Chr8	==	AT2G44940.1.TAIR10	Chr2
StDREB21	PGSC0003DMT400058587.v4.03	Chr8	==	AT5G52020.1.TAIR10	Chr5
StDREB17	PGSC0003DMT400005709.v4.03	Chr8	==	AT5G25810.1.TAIR10	Chr5
StDREB37	PGSC0003DMT400059885.v4.03	Chr7	==	AT1G19210.1.TAIR10	Chr1

## Sheet: Sheet2
Orthologous gene pairs between S. tuberosum and S. lycopersicum
Gene name	Gene ID of S.tuberosum	Chr ID of S.tuberosum	Syntenic with	Gene ID of S.lycopersicum	Chr ID of S.lycopersicum
StDREB33	PGSC0003DMT400010228.v4.03	Chr2	==	Solyc02g093130.1.1.ITAG2.4	Chr2
StDREB33	PGSC0003DMT400010228.v4.03	Chr2	==	Solyc04g078640.1.1.ITAG2.4	Chr4
StDREB46	PGSC0003DMT400066977.v4.03	Chr1	==	Solyc01g090560.2.1.ITAG2.4	Chr1
StDREB62	PGSC0003DMT400043930.v4.03	Chr1	==	Solyc01g091760.2.1.ITAG2.4	Chr1
StDREB65	PGSC0003DMT400097578.v4.03	Chr1	==	Solyc01g008880.1.1.ITAG2.4	Chr1
StDREB18	PGSC0003DMT400088795.v4.03	Chr1	==	Solyc01g009440.1.1.ITAG2.4	Chr1
StDREB53	PGSC0003DMT400022528.v4.03	Chr1	==	Solyc01g057080.1.1.ITAG2.4	Chr1
StDREB46	PGSC0003DMT400066977.v4.03	Chr1	==	Solyc08g078420.1.1.ITAG2.4	Chr8
StDREB36	PGSC0003DMT400068040.v4.03	Chr12	==	Solyc03g120840.1.1.ITAG2.4	Chr3
StDREB44	PGSC0003DMT400022023.v4.03	Chr12	==	Solyc04g072900.1.1.ITAG2.4	Chr4
StDREB44	PGSC0003DMT400022023.v4.03	Chr12	==	Solyc04g054910.2.1.ITAG2.4	Chr4
StDREB4	PGSC0003DMT400000986.v4.03	Chr12	==	Solyc06g066540.1.1.ITAG2.4	Chr6
StDREB36	PGSC0003DMT400068040.v4.03	Chr12	==	Solyc06g066540.1.1.ITAG2.4	Chr6
StDREB35	PGSC0003DMT400007511.v4.03	Chr12	==	Solyc07g042230.1.1.ITAG2.4	Chr7
StDREB14	PGSC0003DMT400010876.v4.03	Chr12	==	Solyc08g007820.1.1.ITAG2.4	Chr8
StDREB14	PGSC0003DMT400010876.v4.03	Chr12	==	Solyc12g056430.1.1.ITAG2.4	Chr12
StDREB44	PGSC0003DMT400022023.v4.03	Chr12	==	Solyc12g056980.1.1.ITAG2.4	Chr12
StDREB4	PGSC0003DMT400000986.v4.03	Chr12	==	Solyc12g044390.1.1.ITAG2.4	Chr12
StDREB4	PGSC0003DMT400000986.v4.03	Chr12	==	Solyc12g008350.1.1.ITAG2.4	Chr12
StDREB35	PGSC0003DMT400007511.v4.03	Chr12	==	Solyc12g009240.1.1.ITAG2.4	Chr12
StDREB43	PGSC0003DMT400091991.v4.03	Chr12	==	Solyc12g013660.1.1.ITAG2.4	Chr12
StDREB36	PGSC0003DMT400068040.v4.03	Chr12	==	Solyc12g044390.1.1.ITAG2.4	Chr12
StDREB12	PGSC0003DMT400020525.v4.03	Chr4	==	Solyc02g093130.1.1.ITAG2.4	Chr2
StDREB30	PGSC0003DMT400024508.v4.03	Chr4	==	Solyc04g072900.1.1.ITAG2.4	Chr4
StDREB12	PGSC0003DMT400020525.v4.03	Chr4	==	Solyc04g078640.1.1.ITAG2.4	Chr4
StDREB10	PGSC0003DMT400009506.v4.03	Chr4	==	Solyc04g080910.1.1.ITAG2.4	Chr4
StDREB30	PGSC0003DMT400024508.v4.03	Chr4	==	Solyc04g054910.2.1.ITAG2.4	Chr4
StDREB41	PGSC0003DMT400053152.v4.03	Chr4	==	Solyc04g054910.2.1.ITAG2.4	Chr4
StDREB7	PGSC0003DMT400073853.v4.03	Chr4	==	Solyc04g050750.1.1.ITAG2.4	Chr4
StDREB41	PGSC0003DMT400053152.v4.03	Chr4	==	Solyc04g072900.1.1.ITAG2.4	Chr4
StDREB30	PGSC0003DMT400024508.v4.03	Chr4	==	Solyc12g056980.1.1.ITAG2.4	Chr12
StDREB66	PGSC0003DMT400063264.v4.03	Chr3	==	Solyc03g114440.1.1.ITAG2.4	Chr3
StDREB52	PGSC0003DMT400001703.v4.03	Chr3	==	Solyc03g116610.2.1.ITAG2.4	Chr3
StDREB40	PGSC0003DMT400036817.v4.03	Chr3	==	Solyc03g117130.2.1.ITAG2.4	Chr3
StDREB61	PGSC0003DMT400014324.v4.03	Chr3	==	Solyc03g119800.1.1.ITAG2.4	Chr3
StDREB27	PGSC0003DMT400006751.v4.03	Chr3	==	Solyc03g120840.1.1.ITAG2.4	Chr3
StDREB58	PGSC0003DMT400037118.v4.03	Chr3	==	Solyc03g026270.1.1.ITAG2.4	Chr3
StDREB40	PGSC0003DMT400036817.v4.03	Chr3	==	Solyc06g065820.2.1.ITAG2.4	Chr6
StDREB40	PGSC0003DMT400036817.v4.03	Chr3	==	Solyc06g068360.2.1.ITAG2.4	Chr6
StDREB27	PGSC0003DMT400006751.v4.03	Chr3	==	Solyc06g066540.1.1.ITAG2.4	Chr6
StDREB27	PGSC0003DMT400006751.v4.03	Chr3	==	Solyc12g008350.1.1.ITAG2.4	Chr12
StDREB27	PGSC0003DMT400006751.v4.03	Chr3	==	Solyc12g044390.1.1.ITAG2.4	Chr12
StDREB20	PGSC0003DMT400047804.v4.03	Chr11	==	Solyc08g066660.1.1.ITAG2.4	Chr8
StDREB38	PGSC0003DMT400002375.v4.03	Chr11	==	Solyc11g012980.1.1.ITAG2.4	Chr11
StDREB32	PGSC0003DMT400046516.v4.03	Chr11	==	Solyc11g042580.1.1.ITAG2.4	Chr11
StDREB31	PGSC0003DMT400041064.v4.03	Chr10	==	Solyc10g076370.1.1.ITAG2.4	Chr10
StDREB15	PGSC0003DMT400060970.v4.03	Chr10	==	Solyc10g080310.1.1.ITAG2.4	Chr10
StDREB19	PGSC0003DMT400095471.v4.03	Chr10	==	Solyc10g083560.1.1.ITAG2.4	Chr10
StDREB45	PGSC0003DMT400080372.v4.03	Chr9	==	Solyc09g091950.1.1.ITAG2.4	Chr9
StDREB48	PGSC0003DMT400065067.v4.03	Chr6	==	Solyc03g026270.1.1.ITAG2.4	Chr3
StDREB9	PGSC0003DMT400061541.v4.03	Chr6	==	Solyc05g052410.1.1.ITAG2.4	Chr5
StDREB54	PGSC0003DMT400079094.v4.03	Chr6	==	Solyc06g054630.1.1.ITAG2.4	Chr6
StDREB48	PGSC0003DMT400065067.v4.03	Chr6	==	Solyc06g035700.1.1.ITAG2.4	Chr6
StDREB9	PGSC0003DMT400061541.v4.03	Chr6	==	Solyc06g050520.1.1.ITAG2.4	Chr6
StDREB39	PGSC0003DMT400067218.v4.03	Chr6	==	Solyc06g065820.2.1.ITAG2.4	Chr6
StDREB24	PGSC0003DMT400018079.v4.03	Chr5	==	Solyc05g050830.1.1.ITAG2.4	Chr5
StDREB29	PGSC0003DMT400069733.v4.03	Chr5	==	Solyc05g052410.1.1.ITAG2.4	Chr5
StDREB11	PGSC0003DMT400012317.v4.03	Chr8	==	Solyc01g090560.2.1.ITAG2.4	Chr1
StDREB21	PGSC0003DMT400058587.v4.03	Chr8	==	Solyc03g026280.2.1.ITAG2.4	Chr3
StDREB17	PGSC0003DMT400005709.v4.03	Chr8	==	Solyc03g120840.1.1.ITAG2.4	Chr3
StDREB17	PGSC0003DMT400005709.v4.03	Chr8	==	Solyc08g066660.1.1.ITAG2.4	Chr8
StDREB11	PGSC0003DMT400012317.v4.03	Chr8	==	Solyc08g078410.1.1.ITAG2.4	Chr8
StDREB21	PGSC0003DMT400058587.v4.03	Chr8	==	Solyc08g080290.2.1.ITAG2.4	Chr8
StDREB49	PGSC0003DMT400031685.v4.03	Chr8	==	Solyc08g082210.2.1.ITAG2.4	Chr8
StDREB55	PGSC0003DMT400014953.v4.03	Chr8	==	Solyc08g082210.2.1.ITAG2.4	Chr8
StDREB5	PGSC0003DMT400032623.v4.03	Chr8	==	Solyc08g007820.1.1.ITAG2.4	Chr8
StDREB34	PGSC0003DMT400032624.v4.03	Chr8	==	Solyc08g007840.1.1.ITAG2.4	Chr8
StDREB34	PGSC0003DMT400032624.v4.03	Chr8	==	Solyc08g080290.2.1.ITAG2.4	Chr8
StDREB37	PGSC0003DMT400059885.v4.03	Chr7	==	Solyc07g042230.1.1.ITAG2.4	Chr7
StDREB47	PGSC0003DMT400047265.v4.03	Chr7	==	Solyc07g054220.1.1.ITAG2.4	Chr7
StDREB37	PGSC0003DMT400059885.v4.03	Chr7	==	Solyc12g009240.1.1.ITAG2.4	Chr12
