# Supplementary material for: Genome-wide analysis, identification, evolution and genomic organization of dehydration responsive element-binding (DREB) gene family in Solanum tuberosum
Source: PeerJ. 2021 Jun 24;9:e11647. doi: 10.7717/peerj.11647 (PMC8236231; doi:10.7717/peerj.11647)
Supplement: Supplemental Information 8 [file peerj-09-11647-s008.xlsx]

## Sheet: Sheet1
Seq name	EggNOG Description	KeggMap	Gene Ontology Annotation Numbers	Cellular Compartments	Biological Processes	Molecular Functions
StDREB1	Dehydration-responsive element-binding protein	Sequence-specific DNA binding	P:GO:0006355; F:GO:0003677; F:GO:0003700; P:GO:0009414; P:GO:0019760; P:GO:0009631; P:GO:0045893; F:GO:0043565	Nucleus	cold acclimation; glucosinolate metabolic process; positive regulation of transcription, DNA-templated; response to water deprivation	DNA-binding; DNA-binding transcription factor activity
StDREB2	Dehydration-responsive element-binding protein	Sequence-specific DNA binding	P:GO:0006355; F:GO:0003677; F:GO:0003700; P:GO:0009414; P:GO:0019760; P:GO:0009631; P:GO:0045893; F:GO:0043565	Nucleus	cold acclimation; glucosinolate metabolic process; positive regulation of transcription, DNA-templated; response to water deprivation	DNA-binding; DNA-binding transcription factor activity
StDREB3	Dehydration-responsive element-binding protein	Sequence-specific DNA binding	P:GO:0006355; F:GO:0003677; F:GO:0003700; P:GO:0009414; P:GO:0019760; P:GO:0009631; P:GO:0045893; F:GO:0043565	Nucleus	cold acclimation; glucosinolate metabolic process; positive regulation of transcription, DNA-templated; response to water deprivation	DNA-binding; DNA-binding transcription factor activity
StDREB4	DNA-binding domain in plant proteins such as APETALA2 and EREBPs	Sequence-specific DNA binding	P:GO:0006355; F:GO:0003677; F:GO:0003700; P:GO:0045893; F:GO:0043565	Nucleus	Regulation of transcription, DNA-templated	DNA-binding; DNA-binding transcription factor activity
StDREB5	DNA-binding domain in plant proteins such as APETALA2 and EREBPs	Sequence-specific DNA binding	P:GO:0006355; F:GO:0003677; F:GO:0003700	Nucleus		DNA-binding; DNA-binding transcription factor activity
StDREB6	Dehydration-responsive element-binding protein	Sequence-specific DNA binding	P:GO:0006355; F:GO:0003677; F:GO:0003700; P:GO:0009414; P:GO:0019760; P:GO:0009631; P:GO:0045893; F:GO:0043565	Nucleus	cold acclimation; glucosinolate metabolic process; positive regulation of transcription, DNA-templated; response to water deprivation	DNA-binding; DNA-binding transcription factor activity
StDREB7	DNA-binding domain in plant proteins such as APETALA2 and EREBPs	Transcription regulatory region sequence-specific DNA binding	P:GO:0006355; F:GO:0003677; F:GO:0003700; C:GO:0005634; P:GO:0045893; F:GO:0000976	Nucleus	Regulation of transcription, DNA-templated	DNA-binding; DNA-binding transcription factor activity
StDREB8	DNA-binding domain in plant proteins such as APETALA2 and EREBPs	Transcription regulatory region sequence-specific DNA binding	P:GO:0006355; F:GO:0003677; F:GO:0003700; P:GO:0009414; P:GO:0009651; C:GO:0005634; P:GO:0045893; F:GO:0000976; P:GO:0034605	Nucleus	Response to salt stress; cellular response to heat; regulation of transcription, DNA-templated; response to water deprivation	DNA-binding; DNA-binding transcription factor activity
StDREB9	DNA-binding domain in plant proteins such as APETALA2 and EREBPs	Transcription regulatory region sequence-specific DNA binding	P:GO:0006355; F:GO:0003677; F:GO:0003700; P:GO:0009414; P:GO:0009555; F:GO:0000976; P:GO:0009737; P:GO:0009636; P:GO:0042542; P:GO:0046677; P:GO:0042493; C:GO:0005634; P:GO:0045893; P:GO:0010286; P:GO:0010224	Nucleus	heat acclimation; response to toxic substance; response to UV-B; response to antibiotic; response to abscisic acid; pollen development; response to hydrogen peroxide; response to drug; response to water deprivation; regulation of transcription, DNA-templated	DNA-binding; DNA-binding transcription factor activity
StDREB10	Dehydration-responsive element-binding protein	Transcription regulatory region sequence-specific DNA binding	P:GO:0006355; F:GO:0003677; F:GO:0003700; P:GO:0042493; C:GO:0005634; P:GO:0045893; F:GO:0000976; P:GO:0010200	Nucleus	response to chitin; response to drug; positive regulation of transcription, DNA-templated	DNA-binding; DNA-binding transcription factor activity
StDREB11	DNA-binding domain in plant proteins such as APETALA2 and EREBPs	Sequence-specific DNA binding	P:GO:0006355; F:GO:0003677; F:GO:0003700	Nucleus		DNA-binding; DNA-binding transcription factor activity
StDREB12	DNA-binding domain in plant proteins such as APETALA2 and EREBPs	Sequence-specific DNA binding	P:GO:0006355; F:GO:0003677; F:GO:0003700; P:GO:0009414; P:GO:0045893; P:GO:0009409	Nucleus	response to cold; regulation of transcription, DNA-templated; response to water deprivation	DNA-binding; DNA-binding transcription factor activity
StDREB13	DNA-binding domain in plant proteins such as APETALA2 and EREBPs	Transcription regulatory region sequence-specific DNA binding	P:GO:0006355; F:GO:0003677; F:GO:0003700; P:GO:0009414; P:GO:0009651; C:GO:0005634; P:GO:0045893; F:GO:0000976; P:GO:0034605	Nucleus	response to salt stress; cellular response to heat; positive regulation of transcription, DNA-templated; response to water deprivation	DNA-binding; DNA-binding transcription factor activity
StDREB14	Dehydration-responsive element-binding protein	Sequence-specific DNA binding	P:GO:0006355; F:GO:0003677; F:GO:0003700	Nucleus		DNA-binding; DNA-binding transcription factor activity
StDREB15	DNA-binding domain in plant proteins such as APETALA2 and EREBPs	Transcription regulatory region sequence-specific DNA binding	P:GO:0006355; F:GO:0003677; F:GO:0003700; C:GO:0005634; P:GO:0045893; F:GO:0000976	Nucleus	Regulation of transcription, DNA-templated	DNA-binding; DNA-binding transcription factor activity
StDREB16	DNA-binding domain in plant proteins such as APETALA2 and EREBPs	Sequence-specific DNA binding	P:GO:0006355; F:GO:0003677; F:GO:0003700	Nucleus	Regulation of transcription, DNA-templated	DNA-binding; DNA-binding transcription factor activity
StDREB17	DNA-binding domain in plant proteins such as APETALA2 and EREBPs	Sequence-specific DNA binding	P:GO:0006355; F:GO:0003677; F:GO:0003700; P:GO:0045893; F:GO:0043565	Nucleus	Regulation of transcription, DNA-templated	DNA-binding; DNA-binding transcription factor activity
StDREB18	DNA-binding domain in plant proteins such as APETALA2 and EREBPs	Sequence-specific DNA binding	P:GO:0006355; F:GO:0003677; F:GO:0003700	Nucleus		DNA-binding; DNA-binding transcription factor activity
StDREB19	DNA-binding domain in plant proteins such as APETALA2 and EREBPs	Sequence-specific DNA binding	P:GO:0006355; F:GO:0003677; F:GO:0003700; P:GO:0051704; P:GO:0050832	Nucleus	multi-organism process; defense response to fungus; regulation of transcription, DNA-templated	DNA-binding; DNA-binding transcription factor activity
StDREB20	DNA-binding domain in plant proteins such as APETALA2 and EREBPs	Sequence-specific DNA binding	P:GO:0006355; F:GO:0003677; F:GO:0003700; P:GO:0045893; F:GO:0043565	Nucleus	Regulation of transcription, DNA-templated	DNA-binding; DNA-binding transcription factor activity
StDREB21	DNA-binding domain in plant proteins such as APETALA2 and EREBPs	Transcription regulatory region sequence-specific DNA binding	P:GO:0006355; F:GO:0003677; F:GO:0003700; P:GO:0019760; F:GO:0000976; P:GO:0051704; P:GO:0050832	Nucleus	multi-organism process; defense response to fungus; regulation of transcription, DNA-templated; glucosinolate metabolic process	DNA-binding; DNA-binding transcription factor activity
StDREB22	DNA-binding domain in plant proteins such as APETALA2 and EREBPs	Sequence-specific DNA binding	P:GO:0006355; F:GO:0003677; F:GO:0003700	Nucleus		DNA-binding; DNA-binding transcription factor activity
StDREB23	DNA-binding domain in plant proteins such as APETALA2 and EREBPs	Sequence-specific DNA binding	P:GO:0006355; F:GO:0003677; F:GO:0003700	Nucleus		DNA-binding; DNA-binding transcription factor activity
StDREB24	Transcription factor	Sequence-specific DNA binding	P:GO:0006355; F:GO:0003677; F:GO:0003700	Nucleus		DNA-binding; DNA-binding transcription factor activity
StDREB25	Transcription factor	Sequence-specific DNA binding	P:GO:0006355; F:GO:0003677; F:GO:0003700; P:GO:0009414; P:GO:0045893; P:GO:0009409	Nucleus	response to cold; regulation of transcription, DNA-templated; response to water deprivation	DNA-binding; DNA-binding transcription factor activity
StDREB26	Transcription factor	Sequence-specific DNA binding	P:GO:0006355; F:GO:0003677; F:GO:0003700	Nucleus	Regulation of transcription, DNA-templated	DNA-binding; DNA-binding transcription factor activity
StDREB27	DNA-binding domain in plant proteins such as APETALA2 and EREBPs	Sequence-specific DNA binding	P:GO:0006355; F:GO:0003677; F:GO:0003700	Nucleus	Regulation of transcription, DNA-templated	DNA-binding; DNA-binding transcription factor activity
StDREB28	DNA-binding domain in plant proteins such as APETALA2 and EREBPs	Sequence-specific DNA binding	P:GO:0006355; F:GO:0003677; F:GO:0003700	Nucleus		DNA-binding; DNA-binding transcription factor activity
StDREB29	DNA-binding domain in plant proteins such as APETALA2 and EREBPs	Transcription regulatory region sequence-specific DNA binding	P:GO:0006355; F:GO:0003677; F:GO:0003700; P:GO:0009414; P:GO:0009555; F:GO:0000976; P:GO:0009737; P:GO:0009636; P:GO:0042542; P:GO:0046677; P:GO:0042493; C:GO:0005634; P:GO:0045893; P:GO:0010286; P:GO:0010224	Nucleus	heat acclimation; response to toxic substance; response to UV-B; P:response to antibiotic; response to abscisic acid; pollen development; response to hydrogen peroxide; response to drug; response to water deprivation; regulation of transcription, DNA-templated	DNA-binding; DNA-binding transcription factor activity
StDREB30	DNA-binding domain in plant proteins such as APETALA2 and EREBPs	Sequence-specific DNA binding	P:GO:0006355; F:GO:0003677; F:GO:0003700; P:GO:0009414; P:GO:0009611; P:GO:0009873; P:GO:0045595; C:GO:0005634; P:GO:0009409; P:GO:0071472; F:GO:0043565; P:GO:0009736; P:GO:0009416	Nucleus	response to wounding; cellular response to salt stress; ethylene-activated signaling pathway; response to light stimulus; regulation of transcription, DNA-templated; cytokinin-activated signaling pathway; regulation of cell differentiation; response to cold; response to water deprivation	DNA-binding; DNA-binding transcription factor activity
StDREB31	DNA-binding domain in plant proteins such as APETALA2 and EREBPs	Transcription regulatory region sequence-specific DNA binding	P:GO:0006355; F:GO:0003677; F:GO:0003700; P:GO:0009414; P:GO:0009651; C:GO:0005634; P:GO:0045893; F:GO:0000976; P:GO:0034605	Nucleus	response to salt stress; cellular response to heat; regulation of transcription, DNA-templated; response to water deprivation	DNA-binding; DNA-binding transcription factor activity
StDREB32	Transcription factor	Sequence-specific DNA binding	P:GO:0006355; F:GO:0003677; F:GO:0003700; P:GO:0006355	Nucleus	Regulation of transcription, DNA-templated	DNA-binding; DNA-binding transcription factor activity
StDREB33	DNA-binding domain in plant proteins such as APETALA2 and EREBPs	Sequence-specific DNA binding	P:GO:0006355; F:GO:0003677; F:GO:0003700; P:GO:0009414; P:GO:0045893; P:GO:0009409	Nucleus	response to cold; positive regulation of transcription, DNA-templated; response to water deprivation	DNA-binding; DNA-binding transcription factor activity
StDREB34	DNA-binding domain in plant proteins such as APETALA2 and EREBPs	Transcription regulatory region sequence-specific DNA binding	P:GO:0006355; F:GO:0003677; F:GO:0003700; P:GO:0019760; F:GO:0000976; P:GO:0051704; P:GO:0050832	Nucleus	multi-organism process; defense response to fungus; regulation of transcription, DNA-templated; glucosinolate metabolic process	DNA-binding; DNA-binding transcription factor activity
StDREB35	Transcription factor	Sequence-specific DNA binding	P:GO:0006355; F:GO:0003677; F:GO:0003700; P:GO:0009611; P:GO:0010087; P:GO:0051301; P:GO:0002213	Nucleus	response to wounding; cell division; defense response to insect; regulation of transcription, DNA-templated; phloem or xylem histogenesis	DNA-binding; DNA-binding transcription factor activity
StDREB36	DNA-binding domain in plant proteins such as APETALA2 and EREBPs	Sequence-specific DNA binding	P:GO:0006355; F:GO:0003677; F:GO:0003700	Nucleus	Regulation of transcription, DNA-templated	DNA-binding; DNA-binding transcription factor activity
StDREB37	DNA-binding domain in plant proteins such as APETALA2 and EREBPs	Sequence-specific DNA binding	P:GO:0006355; F:GO:0003677; F:GO:0003700	Nucleus	Regulation of transcription, DNA-templated	DNA-binding; DNA-binding transcription factor activity
StDREB38	DNA-binding domain in plant proteins such as APETALA2 and EREBPs	Transcription regulatory region sequence-specific DNA binding	P:GO:0006355; F:GO:0003677; F:GO:0003700; P:GO:0046677; P:GO:0009753; P:GO:0042493; P:GO:0009751; P:GO:0071497; C:GO:0005634; P:GO:0045893; F:GO:0000976; P:GO:0001101; P:GO:0034605	Nucleus	response to antibiotic; P:response to salicylic acid; response to drug; cellular response to heat; response to jasmonic acid; response to acid chemical; cellular response to freezing; positive regulation of transcription, DNA-templated	DNA-binding; DNA-binding transcription factor activity
StDREB39	Ethylene-responsive transcription factor ERF003-like	Sequence-specific DNA binding	P:GO:0006355; F:GO:0003677; F:GO:0003700	Nucleus		DNA-binding; DNA-binding transcription factor activity
StDREB40	AP2 domain	Sequence-specific DNA binding	P:GO:0006355; F:GO:0003677; F:GO:0003700	Nucleus		DNA-binding; DNA-binding transcription factor activity
StDREB41	Transcription factor	Sequence-specific DNA binding	P:GO:0006355; F:GO:0003677; F:GO:0003700	Nucleus	Regulation of transcription, DNA-templated	DNA-binding; DNA-binding transcription factor activity
StDREB42	DNA-binding domain in plant proteins such as APETALA2 and EREBPs	Sequence-specific DNA binding	P:GO:0006355; F:GO:0003677; F:GO:0003700	Nucleus		DNA-binding; DNA-binding transcription factor activity
StDREB43	DNA-binding domain in plant proteins such as APETALA2 and EREBPs	Sequence-specific DNA binding	P:GO:0006355; F:GO:0003677; F:GO:0003700	Nucleus		DNA-binding; DNA-binding transcription factor activity
StDREB44	DNA-binding domain in plant proteins such as APETALA2 and EREBPs	Sequence-specific DNA binding	P:GO:0006355; F:GO:0003677; F:GO:0003700; P:GO:0009414; P:GO:0009611; P:GO:0009873; P:GO:0045595; C:GO:0005634; P:GO:0009409; P:GO:0071472; F:GO:0043565; P:GO:0009736; P:GO:0009416	Nucleus	response to wounding; cellular response to salt stress; ethylene-activated signaling pathway; response to light stimulus; regulation of transcription, DNA-templated; cytokinin-activated signaling pathway; regulation of cell differentiation; response to cold; response to water deprivation	DNA-binding; DNA-binding transcription factor activity
StDREB45	DNA-binding domain in plant proteins such as APETALA2 and EREBPs	Sequence-specific DNA binding	P:GO:0006355; F:GO:0003677; F:GO:0003700	Nucleus	Regulation of transcription, DNA-templated	DNA-binding; DNA-binding transcription factor activity
StDREB46	DNA-binding domain in plant proteins such as APETALA2 and EREBPs	Sequence-specific DNA binding	P:GO:0006355; F:GO:0003677; F:GO:0003700	Nucleus		DNA-binding; DNA-binding transcription factor activity
StDREB47	Ethylene-responsive transcription factor	Sequence-specific DNA binding	P:GO:0006355; F:GO:0003677; F:GO:0003700; P:GO:2000070; P:GO:0042493; P:GO:0009651; P:GO:1900036; C:GO:0005634; P:GO:0045893; P:GO:0010200; C:GO:0005737; F:GO:0043565	Nucleus; Cytoplasm	response to salt stress; response to chitin; regulation of response to water deprivation; response to drug; regulation of cellular response to heat; regulation of transcription, DNA-templated	DNA-binding; DNA-binding transcription factor activity
StDREB48	Transcription factor	Sequence-specific DNA binding	P:GO:0006355; F:GO:0003677; F:GO:0003700	Nucleus		DNA-binding; DNA-binding transcription factor activity
StDREB49	DNA-binding domain in plant proteins such as APETALA2 and EREBPs	Sequence-specific DNA binding	P:GO:0006355; F:GO:0003677; F:GO:0003700; P:GO:0042493; P:GO:0010200	Nucleus	response to chitin; regulation of transcription, DNA-templated; response to drug	DNA-binding; DNA-binding transcription factor activity
StDREB50	Transcription factor	Sequence-specific DNA binding	P:GO:0006355; F:GO:0003677; F:GO:0003700	Nucleus		DNA-binding; DNA-binding transcription factor activity
StDREB51	DNA-binding domain in plant proteins such as APETALA2 and EREBPs	Sequence-specific DNA binding	P:GO:0006355; F:GO:0003677; F:GO:0003700	Nucleus		DNA-binding; DNA-binding transcription factor activity
StDREB52	DNA-binding domain in plant proteins such as APETALA2 and EREBPs	Sequence-specific DNA binding	P:GO:0006355; F:GO:0003677; F:GO:0003700; P:GO:0009414; P:GO:0009873; P:GO:0010143; F:GO:0043565; P:GO:0010166	Nucleus	ethylene-activated signaling pathway; cutin biosynthetic process; regulation of transcription, DNA-templated; wax metabolic process; response to water deprivation	DNA-binding; DNA-binding transcription factor activity
StDREB53	DNA-binding domain in plant proteins such as APETALA2 and EREBPs	Sequence-specific DNA binding	P:GO:0006355; F:GO:0003677; F:GO:0003700; P:GO:0042631; P:GO:0042493; C:GO:0005634; P:GO:0010200; C:GO:0005737	Nucleus; Cytoplasm	response to chitin; cellular response to water deprivation; regulation of transcription, DNA-templated; response to drug	DNA-binding; DNA-binding transcription factor activity
StDREB54	DNA-binding domain in plant proteins such as APETALA2 and EREBPs	Sequence-specific DNA binding	P:GO:0006355; F:GO:0003677; F:GO:0003700	Nucleus		DNA-binding; DNA-binding transcription factor activity
StDREB55	Transcription factor	Sequence-specific DNA binding	P:GO:0006355; F:GO:0003677; F:GO:0003700; P:GO:0042493; P:GO:0010200	Nucleus	response to chitin; regulation of transcription, DNA-templated; response to drug	DNA-binding; DNA-binding transcription factor activity
StDREB56	Transcription factor	Sequence-specific DNA binding	P:GO:0006355; F:GO:0003677; F:GO:0003700	Nucleus		DNA-binding; DNA-binding transcription factor activity
StDREB57	DNA-binding domain in plant proteins such as APETALA2 and EREBPs	Sequence-specific DNA binding	P:GO:0006355; F:GO:0003677; F:GO:0003700	Nucleus		DNA-binding; DNA-binding transcription factor activity
StDREB58	Dehydration-responsive element-binding protein	Sequence-specific DNA binding	P:GO:0006355; P:GO:0006952; F:GO:0003677; F:GO:0003700; C:GO:0005634; C:GO:0016020; P:GO:0009414; P:GO:0019760; P:GO:0009631; P:GO:0045893; F:GO:0043565	Nucleus	cold acclimation; glucosinolate metabolic process; regulation of transcription, DNA-templated; response to water deprivation	DNA-binding; DNA-binding transcription factor activity
StDREB59	Dehydration-responsive element-binding protein	Sequence-specific DNA binding	P:GO:0006355; P:GO:0006952; P:GO:0009873; F:GO:0003677; F:GO:0003700; C:GO:0005634; P:GO:0009414; P:GO:0019760; P:GO:0009631; P:GO:0045893; F:GO:0043565	Nucleus	cold acclimation; glucosinolate metabolic process; regulation of transcription, DNA-templated; response to water deprivation	DNA-binding; DNA-binding transcription factor activity
StDREB60	DNA-binding domain in plant proteins such as APETALA2 and EREBPs	Transcription regulatory region sequence-specific DNA binding	P:GO:0006355; F:GO:0003677; F:GO:0003700; P:GO:0019760; F:GO:0000976; P:GO:0051704; P:GO:0050832	Nucleus	multi-organism process; defense response to fungus; regulation of transcription, DNA-templated; glucosinolate metabolic process	DNA-binding; DNA-binding transcription factor activity
StDREB61	DNA-binding domain in plant proteins such as APETALA2 and EREBPs	Sequence-specific DNA binding	P:GO:0006355; F:GO:0003677; F:GO:0003700; P:GO:0009723; P:GO:0048528; C:GO:0005634; F:GO:0043565; P:GO:0035865; P:GO:0000302	Nucleus	response to reactive oxygen species; post-embryonic root development; response to ethylene; regulation of transcription, DNA-templated; cellular response to potassium ion	DNA-binding; DNA-binding transcription factor activity
StDREB62	DNA-binding domain in plant proteins such as APETALA2 and EREBPs	Sequence-specific DNA binding	P:GO:0006355; F:GO:0003677; F:GO:0003700; P:GO:0009723; P:GO:0048528; C:GO:0005634; F:GO:0043565; P:GO:0035865; P:GO:0000302	Nucleus	response to reactive oxygen species; post-embryonic root development; response to ethylene; regulation of transcription, DNA-templated; cellular response to potassium ion	DNA-binding; DNA-binding transcription factor activity
StDREB63	DNA-binding domain in plant proteins such as APETALA2 and EREBPs	Transcription regulatory region sequence-specific DNA binding	P:GO:0006355; F:GO:0003677; F:GO:0003700; P:GO:0005983; P:GO:0009414; P:GO:0009744; P:GO:0006970; P:GO:0010449; P:GO:0010119; P:GO:0032880; F:GO:0000976; P:GO:0009749; P:GO:0009738; P:GO:0048527; P:GO:0071229; P:GO:0048316; P:GO:0010182; C:GO:0005634; P:GO:0045893; P:GO:0010353; P:GO:0031930; P:GO:0010896	Nucleus	mitochondria-nucleus signaling pathway; cellular response to acid chemical; regulation of protein localization; starch catabolic process; lateral root development; sugar mediated signaling pathway; seed development; response to sucrose; abscisic acid-activated signaling pathway; regulation of stomatal movement; response to osmotic stress; response to trehalose; response to glucose; regulation of …	DNA-binding; DNA-binding transcription factor activity
StDREB64	DNA-binding domain in plant proteins such as APETALA2 and EREBPs	Transcription regulatory region sequence-specific DNA binding	P:GO:0006355; F:GO:0003677; F:GO:0003700; P:GO:0005983; P:GO:0009414; P:GO:0009744; P:GO:0006970; P:GO:0010449; P:GO:0010119; P:GO:0032880; F:GO:0000976; P:GO:0009749; P:GO:0009738; P:GO:0048527; P:GO:0071229; P:GO:0048316; P:GO:0010182; C:GO:0005634; P:GO:0045893; P:GO:0010353; P:GO:0031930; P:GO:0010896	Nucleus	mitochondria-nucleus signaling pathway; cellular response to acid chemical; regulation of protein localization; starch catabolic process; lateral root development; sugar mediated signaling pathway; seed development; response to sucrose; abscisic acid-activated signaling pathway; regulation of stomatal movement; response to osmotic stress; response to trehalose; response to glucose; regulation of …	DNA-binding; DNA-binding transcription factor activity
StDREB65	Transcription factor	Sequence-specific DNA binding	P:GO:0006355; F:GO:0003677; F:GO:0003700	Nucleus		DNA-binding; DNA-binding transcription factor activity
StDREB66	DNA-binding domain in plant proteins such as APETALA2 and EREBPs	Sequence-specific DNA binding	P:GO:0006355; F:GO:0003677; F:GO:0003700; P:GO:0009723; P:GO:0048528; C:GO:0005634; F:GO:0043565; P:GO:0035865; P:GO:0000302	Nucleus	response to reactive oxygen species; post-embryonic root development; response to ethylene; regulation of transcription, DNA-templated; cellular response to potassium ion	DNA-binding; DNA-binding transcription factor activity

## Sheet: Sheet2
Transcript Sequences of 66 StDREB genes
Gene name	Transcript Sequences
StDREB1	ATGTTGTTACTAGCTTCGAAAATCCCAAAAAAACGTGGAGGTAGGAAGAAGTTTCGTGAAACTAGACACCCGGTTTATAGGGGAGTGAGGTGGAAGAATTTCGAAAAGTGGGTTAGTGAAGTGAGAGTACCTGGTAAAAAGTCAAGAATATGGCTTGGCACGTTTCCCAATGCAGAAATGGCAGCTAGAGCTCATGACGTGGCGGTCATGGCTCTTAAAGGCCGGTCAGCTTGTTTGAATTTTGCTGACTCGGCTTGGAGGTTGCCTGTCCCTGCTTCAGCAACCGCCAAGGATATTCAAAAGGCGGCTGCTGAAGCAACTGAGACATTTCGTGCGTCAGAATCCTTGGAGAGAGAAAACTCTGAGGAAGTTGTTGTTAATAATGATGATCATTATGTT…
StDREB2	ATGTTTCCAAGCTATTATTCGGAGCCACTCACTCAATTATCATCATCGTCATCATCAATACTATCTGATAATAGCAATCACTACTCCCCTAATAATAATTTTTCTGATGAGGAAGTTATTAATTTAGCTTCAAATAACCCGAAAAAGCCAGCTGGCAGGAAGAAGTTTCGAGAAACTCGACATCCCGTATTCAGGGGAATCAGGATGAGGAATTCCGGAAAATGGGTTTGTGAAGTTAGAGAACCAAATAAGAAATCTAGAATTTGGCTCGGCACATTCCCTACTGCTGAAATGGCGGCTAGAGCTCATGACGTGGCGGCTTTAGCATTAAGGGGCCGTTCTGCTTGCTTGAACTTTGCTGACTCTGTTTGGAGGTTGCCTATCCCTGCTTCCTCCAAC…
StDREB3	ATGGATATCTTTCGAAGCTATTATTCGGACCCACAAATAGAATCTTCTTCATCATTTTCTGATACTACTACTTATAACTCTCCTAATAGAGCCAATCATTCTGATGAGGAAGTTATTTTAGCTTCAAATAATCCAAAGAAGCCAGCTGGAAGGAAGAAGTTTCGAGAAACTCGACATCCAGTATACAGGGGAGTCAGGATGAGGAATTCAGGAAAATGGGTTTGTGAAGTCAGAGAACCAAATAAGAAAACAAGGATTTGGCTTGGTACTTTTCCAACTGCTGAAATGGCGGCTAGAGCTCATGACGTGGCGGCTATAGCATTAAGAGGCCGTTCTGCTTGTTTGAATTTTGCTGACTCTGCTTGGAGGTTGCCTACCCCGGCTTCCTCCGACACTAAG…
StDREB4	ATGTCTACAGAGCAACCAAATTGTTCAGAAAGTACTGAATCTAGCTGCAACTCTTCTTCTTCTTCGCCGCCCTCATCGCCATCTTTTGTTCTTCTTCAACCACTTCCGCAAATCAATTCGAAAAATCGACTCAAAAGATGCAGAGGAGAAGAAGAAGAAGTAAACGAAGTCGTTAATAATGCAAACCCAAATCCGAAGAAGATCAGTAAAAACAACAATGGTGGTAGTACTGATGTTTCGTATGTAGGTGTACGAATGAGAGCATGGGGTAAATGGGTATCCGAAATCCGTGAACCTAAAAAGAAATCACGGATTTGGTTGGGTACCTTCGCTACCCCGGAAATGGCGGCGCGTGCTCACGACGTAGCCGCCATGTCCATTAAAGGAACCTCAGCAATA…
StDREB5	ATGAATGATAATAACTTTAGAGATCACTACTTGCACGAAACATCAACATCTTCAGGAGGAGTTCAAGATGAAGGAATATTTCTACTAGCTTCGAGTCAACCTAAGAAACGTGCAGGGAGAAAGAAGTTCAAGGAAACTCGCCACCCAATTTATAGGGGAGTGAGAAGGAGGGATAATAATAAGTGGGTTTGCGAGGTACGTGAGCCTATTGAGCAAAAAAGAATATGGCTAGGAACTTACCCTACTCCTGAAATGGCAGCTCGAGCTCATGATGTAGCTGCATTAGCACTTAGAGGTAATCTAGCCACTTTAAATTTCGCCGACTCTAGTTGGCGGTTGGCGGTGCCGGTATCAAAGGATCCCGAAGAATTACGCCAGGCCGCTATGAAAGCAGCCGAA…
StDREB6	ATGAATATCTTTGAAACCTATTATTCAGACCCACTAATTTTAACCGAATCTTCTTCTTCTTCTTCATCATCATCTGACGAGGAAATTATTTTAGCTTCGAATAACCCAAAAAGGCCAGCTGGAAGGAAGAAGTTTCGAGAAACTCGACATCCGATATACAGGGGAATCAGGATGAGGAATTCAGGAAAATGGGTTTGTGAAGTCAGAGAACCAAATAAGAAATCAAGGATTTGGCTTGGTACTTTTCCTACTGCTGAAATGGCGGCTAGAGCTCATGACGTGGCAGCTTTAGCATTAAGAGGCCGTTCTGCTTGCTTGAATTTCGCTGATTCTGCTTGGAGGTTGCCTATCCCTGCTTCCTCCAACTCTAAAGATATTCAAAAGGCGGCCGCTGAGGCC…
StDREB7	ATGGCGGAATGTGTAGAATCAAAGAAATCAATAGTTGGACGTTCGAGAAAAGGTTGCATGAGAGGTAAAGGCGGTCCAGAAAACGCGTTGTGCACATATAGAGGAGTGAGACAAAGAACATGGGGCAAATGGGTAGCTGAAATAAGAGAACCAAATCGTGGAGCACGAATTTGGTTAGGCACTTTCAATACATCAGTCGAAGCAGCCAGAGCCTATGATGACGCAGCACGCCGGCTTTATGGTTCTGATGCGAAGCTCAATCTCTCAGAAGAAGAAGAATCAATAATTTCTTCGGACACAGAAATTAGTTGCATGGAAAACAACATAATCGAGGAATGTTCTGTACTTGAGGAAGCATCCATATTTAAAGATGGAAACGGGGAGTATTTGGTGTGGGAT…
StDREB8	ATGCCAGGCAAAGGCGGTCCTGAGAATTCGAGTTGTAAATACAGAGGAGTTAGGCAGAGGACTTGGGGTAAATGGGTGGCTGAAATTCGCGAGCCTGTTTATATTAGTGGTGAGTATAAGAACAGAGGAAAGCGACTTTGGCTAGGTTCTTTTGCTACTGCTGATGAGGCTGCTATTGCTTATGATGAAGCTGCTAAGGTTATGTATGGATCCAATGCCACACTTAACTTCCCCAATTATTGTGGATCGTCGAGTAATGATACATCTTCACTTGAATCGAGTGGTCAATCGTCTGTTGATCATGAAGATTTAGTGGTTGATGATGCAGAGAAGATTGAAATTGAGTCGGATTTGTAA
StDREB9	ATGGCTATTATGGATCAAGCTGCTAATATGGCTACTCTGCCGTTGGATTATAGTGGAAAGAGGAAATCAAGGAGTAGAAGGGACAGAACAAAGAATGTGGAAGAGAGACTAGCTAAATGGAAAGAGTATAATGAGAAACTAGATAGTGTTGATGATGAAGGGAAGCCAGTGCGTAAAGTTCCTGCTAAAGGTTCAAAGAAGGGGTGTATGAGAGGTAAAGGGGGACCCGAAAATTCGCGGTGTAAATACAGAGGTGTTAGACAGAGGATATGGGGTAAATGGGTTGCTGAGATTAGGGAACCTAAAAGAGGTAGTAGGCTATGGTTGGGTACATTTGGTACAGCAATTGAAGCTGCTCTAGCATATGATGAAGCAGCAAGAGCTATGTATGGTCCTTGT…
StDREB10	ATGTCAACAACCTCCAAGAAGTTGATCCCAGCTACATCCCGCAAGGGATGTATGCGTGGTAAAGGTGGCCCCGAGAATGCAAGTTGCACGTACAAAGGTGTACGGCAACGCACCTGGGGCAAATGGGTAGCCGAGATCCGCGAACCCAATCGCGGAGCTCGGCTTTGGCTCGGCACCTTTGATAATTCTTATGACGCTGCTGTCGTCTATGACGCTGCAGCCCTTAAGCTTTATGGTGCCGAAGCCAAACTCAATTTGCCCCATCTGTACAGCATTCCGGCCCAGGATCAGTCCCAGGCCCAGTCCCAAATCCAAAACTCTAGGCCCATTACTATCATGAGCCCATCTCTAGCTCCCGTTTCAGCTACTGCTCCAGCTTCAGTTCCTGCTCCGCCTGTA…
StDREB11	ATGGAAGAAAAAGATGAATCTCCCATTATTTTCAACAACAATCAAACAATCCCTTCTTCATCTCTAACAAAAAGATCAATAACCTTAAAACCATCAAAACAACAAAGCAATCACAACAAGAAAATCAAATCCAGTACAGAAAAAACCAAGAAAATTGATGACTCAAAACACCCAATTTACCACGGTGTTCGAAAACGGAGCTGGGGTAAATGGGTGTCTGAAATTCGCGAACCGAGGAAAAAATCAAGAATTTGGCTTGGTACTTTTTCTACTGCTGAAATGGCTGCCAGAGCACATGATGTAGCTGCAATTGCCATTAAAGGTGACTTAGCTTTACTCAATTTCCCTGAATTAGCTCATCAGTTTCCTAAACCAGCTTCGAAATGCGCTAAAGATATT…
StDREB12	ATGATGGAAGGAGAAAAGAGAAAGCAGAGGGAACACCAACAAGATAAGCCATACAGAGGAATACGGATGAGGAAGTGGGGTAAATGGGTAGCTGAAATTCGAGAACCAAACAAACGGTCTCGAATTTGGCTTGGTTCTTATTCTTCCCCTGTTGCTGCTGCTCGTGCTTACGATACCGCTGTATTTTACTTGCGAGGTCCTTCAGCTAGGCTTAATTTCCCTGAATTCATAGTTGATGACCATGAAAATCACGATCTATCAGCTGCTTCTATTAGGAAGAAAGCTACTGAGGTAGGTGCTAGAGTTGATGCTCTTCAAACTGCGATTCATAATTCTACTGCTATTCCTCCTGAATCCAATTCTAAATCCACAAGGATGATGATGAAGCCTGATTTGAAT…
StDREB13	ATGGATTTTTGTGTTGACAGGAAACTGAAAAGAAGGCGTAATGGATCTGATTCCATAGATGAGATTTTATTAAGATGGAGAAATTTTAATAAGGAGGTTAATTCAAACAATGAACAAGTGAAGAAGAAGAAGAAGAGAAAATCTCCGGGTAATGGATCAAACAAAGGTTGTATGCCAGGCAAAGGCGGTCCTGAGAATTCTGGTTGTAAATACAGAGGAGTTAGGCAGAGGACTTGGGGTAAATGGGTGGCTGAAATTCGCGAACCTGTTTATATTAGTGCTGCTAAGGTTATGTATGGATCCAATGCCATACTTAATTTCCCCAATTGTTGTGACAGGTCGAGTAATACTCGAACATCTTCACTTGAATCGAGTGTTCAATCGTCTATTGATCATGAA…
StDREB14	ATGAATGATTCGAGTAACTCATGTTCTTCGAATAGAACGGAACGTTCGGATGAAGAAAATATTTTATTAGTATCATCTAACAAGCCGAAGAAGCGAGCGGCCGGGAGGAAGAAGTTCAAGGAAACACGTCACCCGGTGTTTCGAGGAGTGAGAAAGAGGAACAACGACAAGTGGGTTTGCGAAATTCGCGAACCCACTAAACAAAAGCAAATATGGCTAGGTACGTACCCAACCGCGGAAATGGCTGCACGTGCTCATGATGTGGCTGCATTAGCGCTTAAAGGAGAGTTAGCCACACTGAATTTCGCGGACTCCGCTTGGCGTTTACCGGTTCCGGTATCTAAGGACCCGAAAGAGCTCCGCCAAGCGGCTGCTAGAGCAGCTGAGGCGTTCGAACCG…
StDREB15	ATGGACAGCTACAAAAGAAATCCACTAAAACCATGGAAGAAGGGCCCGGCAAGAGGGAAAGGGGGCCCGCAGAACGCGTTATGTGAATACCGCGGCGTTCGACAGAGAACATGGGGGAAATGGGTAGCAGAAATCAGAGAGCCTAAAAAGAGAACTAGGCTATGGTTAGGATCTTTTGCTACAGCTGAAGAAGCTGCAATGGCTTATGATGAAGCAGCAAGAAGATTATATGGACCAGATGCTTACCTTAATTTACCTCATATGAGAGCTAATTTCAATCCATTGAACAAATCACAAAAGTTCAAATGGTTTTCATCAACCAACAACTTTGTTTCATCATTAATCCCAAATACCACTGGCTTACTCAACTTAAGTGCTCAGCCAAATGTTCATGTAATT…
StDREB16	ATGGAGCAAGTAAAATCACCACCATCCTCCCGGGCAATAACAAATTGCCGGGGAGGGGGTGGGGGAAGTAGTACGAGACACCCTATTTATCGTGGTGTCCGTAGACGAAGATGGGGAAAATGGGTGTCCGAAATTCGAGAGCCAAAAAAAAAATCGCGAATTTGGTTAGGTTCTTTTATTTCACCCGAAACGGCAGCTCGAGCTTATGACGTGGCGGCTTATTGCCTCAAGGGAAGTAAAGCGGAGCTGAATTTTCCAGATGAAATAGAGCGATTACCGCGGCCAATAAGTTCCGGGGCAAGAGATATTCAGGCAGCAGCGACGATGGCAGCGAATATGGGGATTGTGAAGGGAAAAAATGATGAAGATCGTTGTTGTAGCGATGATTTTTGGGAAGAA…
StDREB17	ATGAATTCAGTAGCAGCTCAAGATAATAATGAAATTATTAGTAACAACAAGTCGATAAAGAGGAATCGCGATAGCAGCAAGCATCCAGTTTTTAGAGGAGTTCGAATGAGGAATTGGGGAAAATGGGTGTCAGAAATTCGCGAGCCACGTAAGAAATCACGTATTTGGCTTGGGACTTTTCCAAATCCAGAAATGGCAGCTAGAGCTCATGACGTGGCAGCGTTAAGCATAAAAGGTAATTCAGCTATACTCAACTTTCCTGAACTAGCTGGTTTGCTTCCTAGACCGGCTACACTTAGCCCGCGTGACATTCAAGCAGCCGCAGCAAAAGCCGCAGCTATGGACAAGTTTGATAATAATAATGGTATTACTTCGCCGAATAATTCAATTTCATCAAAT…
StDREB18	ATGGATTTTGAAGATGCACTAACTTCTTCTTCTTCATCTTCTTCTGATCATGATAATAAAGAAAAAAACATTGATCTTTCATCGTGTTCGACGAATAATAATAATGTACAATTCAAGAGGAGGGCAGGGAGGAAAAAGTTCAAGGAGACTCGACATCCATTATATAGAGGAGTTAGGAGAAGAAATGGAGAAAAATGGGTGTGTGAAATACGCGAGCCAAATAAAAAAACAAGAATTTGGTTAGGTACTTTCTCTACTCCTGAAATAGCAGCTAGGGCACACGATGTTGCTGCCCTAGCTCTCCGGGGAAGTAATGCTCTTCTTAACTTCCCCGGATCCGCTTGGTCTCTACCTAAAGCTAAATCTTCTTCTCCTCAAGACATTCAAATCGCGGTTCTC…
StDREB19	ATGTCAAGTTCTGGGGAAAATAACGGATCAGGACGACACCCGGTATACAAAGGGATAAGAAGAAGGAAAAGTAGCGGAAAATGGGTGTCAGAAATTCGGGAACCGCGGTCTCCTAATCGGATTTGGCTCGGTACATTCCCGACCCCGGAAATGGCTGCGGTCGCTTATGACGTGGCAGCACTTGCACTCAAGGGTCGGGATGCCGAGCTTAATTTTCCAAACTCGGCCCCCTCGTTGCCTGTCCCGGCTACTAACTCACCCCGGGATATCCAGACTGCTGCAGCCTGTGCGGCCGCAGCACTCGGGGCAGCCGGGGATGCGTTAGTAGGGGGGAGGAGTAGTAGTAATAGTAATAGCAGAGCGGTTTCAAGAGAAGTGGAGGATAATTATTTGATGCCT…
StDREB20	ATGGAAGGAAAAAAAAAGAAGAAGAGAAATGGAGAGGAAGTATTATATAGAGGTGTACGTATGAGAAATTGGGGAAAATGGGTATCCGAAATTCGCGAGCCTCGTAAAAAATCTCGTATTTGGCTTGGTACGTTTTCTTCGCCTGAAATGGCAGCTCGAGCTCATGATGTAGCCGCTTTATCTATCAAAGGTACTGCTGCAATCCTCAACTTTCCAAAACTTGCAAGTTATCTTCCAAGACCTGCTTCACTAAGCCCTCGCGATATTCAAGCAGCAGCAACAAAAGCAGCTTCTATGAAAAACTTCGATTCTTTATTATCATCGTCTTCTTCTTCTTCCTCTTCATTATCAGTAGCAACGACCAATTTGGGGACAATGTCAGAAGAATTGACCCAAATC…
StDREB21	ATGGCTGACTCTCAAAATTCTACCAAGTCCAACCAAGTAATTCAACCTCCTCATCAATCTAGTGAAAGTACTAAAACACCCTTCAACCCTACCCCTCCTCCACCAATACCACCGCCACCGGCACCGCCGCCACCCCCAGAGACACACATTCAAACAACCAATACATTATTATCAAAATTCGAAAACACAAATTCAACTCCAAAAACAGTTCAACTACCAAATATTATCCCAGCTACAATCATGAGTTCCACCTCATCGGGCAGTTCGGGATCTCCGAGCCGCCCGATAGGGGGAAAACACGCAGTATTCCGCGGAATACGATGTAGGAGTGGGAAATGGGTGTCCGAAATTCGAGAGCCACGTAAGACTACGAGAATATGGTTAGGTACTTACCCTACA…
StDREB22	ATGAAAGTTCAACTTGAAAAATCAAATAGCTTAGATTCTTCTTCTTCATCCTCGTCCTCATCCTCCTTTAACGAGGGCAACATTAACACAAAGATCCTAAAAGAGTACGAATCGAATAAAGTTGAAGAATTCAATAGGGACGACAATGAGAACAAGAGGAGGAAAAAAGTTATTCAGGACGATCATGATGACAAGCATCCAACCTATAGAGGAGTTCGTAAGAGGAATTGGGGAAAATGGGTGTCAGAAATCCGAGAGCCAAGGAAGAAATCAAGAATATGGTTAGGAACTTATTTGACAGCTGAAATGGCTGCTCGAGCTCATGATGTTGCGGCTTTAGCCATTAAAGGTCACTCGGCTTACCTTAATTTCCCTTATTTAGCTGATCAACTCCCACGT…
StDREB23	ATGAATAACAACTCTAGTTTGTACTCGTCAGATCTCAACCCACTAAGTGCAACAACACCTTCCGATGAGGAAGGATTAATACTATTATTAGCTTCAAGCCGGCCCAAGAAACGGGCCGGAAGGAAGAAGTTCAAGGAAACTCGCCACCCAGTTTATAGGGGAGTGAGGAGGAGGAATAACAACAAGTGGGTTTGCGAGCTACGTGAGCCTAGTCAACAAAAAAGAATATGGCTAGGGACTTACCCTACTCCTGAAATGGCGGCTCGAGCTCACGATGTTGCTGCATTAGCACTTAGAGGTAATCTAGCCACTCTGAACTTTGCTGACTCTCGTTGGCGGTTACCAGTGCCAGCATCAAAGGACCCCAAGGACATACGCCAAGCAGCCGTTATAGCCGCA…
StDREB24	ATGGAAAATCAAGAAGAAATAATCAACCTCGAAAATCGTCATGATTTCATCTGTAATGGCTTGAATTCTCCTTCAAACACCGCGACATCATCATCATCATTTTCGAGAAAAATTGAAGAAGAGAAAAAGAAAAAAAAAAGAAATGATGATGACAATAAGCACCCAACCTATAGAGGGGTACGTAAGAGGAGTTGGGGCAAATGGGTGTCCGAAATTCGAGAACCAAAAAAGAAATCAAGAATATGGTTAGGTACTTATCCAACAGCTCAAATGGCAGCTCGAGCTCATGATGTTGCGGCTTTAGCCATCAAGGGATGTTCGGCTCACCTTAATTTTCCTCATTTGGTTGATCAATACCCGCGTCCGGCATCCACTTGTCATAAGGATATCCAAGCAGCA…
StDREB25	ATGGAGGTTGACGGCGTCAGAAGCGGCGATGCTGGGGTGGTTGGAGGCGGAGGAGGAGGAGGAGGAGGGTGTTGCTCCGGGAAGAGAAAAAACGAGAGGGCTTACAAAGGAATAAGGATGAGAAAATGGGGGAAATGGGTTGCTGAAATCCGAGAGCCAAATAAACGGTCGAGGATATGGTTGGGCTCGTATACGACGCCTGTTGCAGCTGCAAGAGCATACGATACAGCTGTTTACTATCTCCGGGGGCCATCGGCCCGGTTAAATTTCCCGGAGCTGTTAGTCGGTGATAGCGGCGAACTCAGTGATTTGTCTGCTGATGCAATTCGTAAGAAGGCTGTTGAAGTAGGTGCTAGAGTTGACGCTATCCAGAGTTCAATGGCTATTTCCGATGATGAC…
StDREB26	ATGGGCGGTATAACATCAGAATATAGAGGTGTTAGAAAGAGGAAATGGGGTAAATGGGTGTCCGAAATCCGTGAGCCAGGAAAGAAAACGAGGATATGGCTAGGGAGTTTTGAGACAGCAGAGATGGCGGCGGCTGCATATGATTCAGCTGCATTTCACCTCAGGGGACATGCAGCTAAGTTAAATTTCCCAGAGTTGATTGGACATTTCCCTAAACCAGCAAGTTCTTCCCCTGAAGATATACGTTTGGCTGCACAACAGGCTGCAATTACAGTTCAAAACACAAATATCATGGCCTCTACTAGTCATGGCCATGAAGCACCAGTTACAGTAGGACTATCTCCAACTCAAATTCAAGCTATTAATGACTTTCCTATGGATTCACCAAATATGTGGACT…
StDREB27	ATGGCGGAAGTTGAAGTACAAATTTCAGAAACAGAGAGCTCTTCTAATACTAATACCTCTGTTTCTTCTTCTTCGTCTTCGTTGTCCGCTGATTCCATGCACAAATCGGTTTTTGATTCGTCAAACAAATTACCGAAAGGGAAGAAACGGCCGACGAAGAAACAGAAGGCTATTACTAATAGTGAGAGTAGACATCAAATTTACAGAGGAGTTAGGATGAGAAGTTGGGGGAAATGGGTATCTGAAATTCGTGAACCGAGGAAGAAATCACGTATTTGGCTCGGTACTTATCCTACAGCAGAAATGGCCGCTAGGGCACATGATGTTGCAGCGGTGAGTATAAAAGGAAAATCCGCCATTCTCAATTTCCCTCATCTAATCGACTCGTTGCCTCGTCCA…
StDREB28	ATGGAAGAAAAAGATGAATCTCCCATTATTTTCAACAACAATCAAACAACTTCTTCTTCATCTCTAACAAAAAGACCAATAACCTTAAAATCATCAAATCAAGAAACCAATCACAACAAGAAAATCAAATCCAGTACTGAAAAAACCAAGAAAATTGATGACTCAAAACACCCAATTTACCACGGTGTTCGAAAACGGAGCTGGGGAAAATGGGTGTCTGAAATTCGCGAGCCGAGGAAAAAATCTAGAATTTGGCTTGGTACTTTTTCTACTGCTGAAATGGCTGCCAGAGCACATGATGTAGCTGCAATTGCCATTAAGGGTCACTTAGCTTTACTCAATTTCCCTGAATTAGCTCATCAATTTCCTAAACCATCTTCGAAATGCGCTAAAGATATT…
StDREB29	ATGGCTGTGCTTGATCAAACATCAAATATGATGTTACCTATGGATTATACAAGAAAGAAGAAATCAAGGAGTAGAAAAGATGCTCCAAAGAATGTAGCAGACACACTTGCGAAGTGGAAAGAGGTGAATGAGAAATTAGACGCGTGTGATGATGATGGAAGAAAGCCAGTACGTAAAGTTCCGGCTAAAGGATCAAAGAAGGGATGTATGAAAGGTAAAGGAGGACCGGATAACGGGCGGTGCAAGTATAGAGGTGTTAGGCAGAGGACATGGGGTAAATGGGTTGCTGAGATTAGGGAGCCACATAGAGGGAGAAGGCTTTGGTTGGGTACATTTGACACAGCAATTGAGGCTGCTCTTGCTTATGATGAAGCTGCAAGGGCAATGTATGGTCCTTGT…
StDREB30	ATGGCAGCTATGGATTTTTGGAATAGTACATCTGTAGATTTTCAATCATCATCAGAACCTATTACTTCTGGTGGTGAATTAATGGAAGCTCTTGAACCTTTTATGAAAAGTGCTTCTTCTTCTCCTTCTCCTCCCCCTTCTACTTTTCCTCCTGTTTTCCCTTCTTCTTCTTCTTCAACTTTTCCTTCTTCAGATTTCCAATCTTATCCTTCATTTCCTCCTCCAACTCCTACCCTTTCATATCCCTACACTTCTTCTTTTTACCCATCTTCTCAATCTACTATGAGCTCTGAGGTTTGTTCCACTTCCACAGAGATGAATTCCCAAATCTTTTCAACTCGGTTTTCTGGGTATGGAATGGAGCAACAGGGTTCAATTGGGTTGAATCAGTTAACCCCA…
StDREB31	ATGGATTTTTATGTTAACAGGAAACTGAAAAGAAGGCGTAATGGATCTGATTCCATAGATGAGATTTTATTAAGATGGAGAAATTTTAATCCGGAGGTTAATTCGAACAATGAACAAGTGAAGAAGAAGAAGAGAAAATCTCCGGGTAATGGATCAAACAAAGGTTGTATGCCAGGCAAAGGCGGTCCTGAGAATTCGGGTTGTAAATACAGAGGAGTAAGGCAGAGGACTTGGGGTAAATGGGTGGCTGAAATTCGCGAACCTGTTTATATTAGTGGTGAGTTTAAGAGCAAAGGGAAGCGGCTTTGGCTCGGTACTTACTCGACTGCTGGTGACGCTGCTATTGCTTATGATGAAGCTGCTAAGGTTATGTATGGATCCAATGCCATACTTAATTTC…
StDREB32	ATGGAAGATGATCAAGAAAGTAAGAATAATATCGACATGTATAGAGGAGTAAGGAAGAGAAAATGGGGGAAATGGGTGTCTGAGATACGCGAACCAGGAAAGAAAACTCGAATATGGTTGGGGAGCTATGAGACAGCAGAAATGGCTGCTGCAGCTTATGATGTTGCTGCATTTCATCTAAAAGGTGAGAGACCAAACTTAAGGCTCAATTTCCCTGAATTAATACATACATTCCCAAAACCCTCAAGTTCAAGACCTGAAGATGTACAAATGGCAGCTCATGAAGCGGCAATGAGGTTCAAACGGCCAATTGATGATCATCCAGACAACTGTGGTGCAGGCCCGGTGAGAGTAGGTCTCTCACCTAGTCAAATTCAGGCGATTAATGAATCCCCGTTG…
StDREB33	ATGGAGATAGGTGGTGGGGGTCAAAGTGGAGTTGCTGCAAGTTCAGGGGTTTGTTGTGGTGGGAAGAGAAAGAACGAAAGGCCATACAAAGGGATTCGTATGAGGAAGTGGGGAAAATGGGTGGCAGAAATTAGAGAACCCAACAAGCGTTCGAGGATCTGGTTGGGTTCGTATTCAACGCCGGTGGCGGCGGCGCGGGCTTATGATACGGCGGTGTATTATCTAAGAGGGCCTTCGGCCCGATTGAATTTTCCTGAGTTGTTAGTTGGTGATGGTGGGCTTAATGATTTGTCTGCTGCTTCAATTCGTAAAAAAGCCATAGAAGTTGGTGCTCAAGTTGATGCTGTACAGAACTCGCTTGCAACCCATCATAACCATACAGAAGAAAAGGTGCACTGT…
StDREB34	ATGACTGACCCTTCACATGCTACAAAGTCAAGAACAAATACCAAACATCCTATATACCGTGGTATACGATGTAGAAGTGGGAAATGGGTGTGTGAAATTAGAGAGCCACGTAAGACAACAAGAATATGGTTAGGCACTTACCCTACACCACAAATGGCTGCTGCTGCCTATGATGTTGCTGCCTTAGCTCTTAAGGGAACTCAAAATGTTGTACTCAATTTTCCTCATCTTGTTGATTCATATCCAAAGCTCCCTCCCTCACCATCTCCGGCCGATATACAACGTGCCGCGGCCACAGCGGCTGGGGCAATGGCCTCGCTAGGCGACGATGATGATCGGTCATTGGAAAGTAGGGATGGGGCTATATGTAACGAAAGGGGTTCAACTGAATTTCCTTCA…
StDREB35	ATGGTGAAACCCAATTCAAAAGATACTGAATTTTCACCTTCATCGTCATCGTCATCTTTGTATCGGGGAGTAAGGAAGAGGAAATGGGGGAAATGGGTATCGGAAATTAGATTACCTAATAGTAGAGAAAGAATTTGGTTGGGTTCTTATGATACGCCGGAAAAAGCTGCTAAAGCATTCGACGCCGCACTTTTTTGTTTGCGGGGTAAAGGGGCTAATTTCAATTTCCCGGAAAATCCACCGGAGATTATGAACGGAAGGTCGATGACTCCGTCGGAGATTCAATCGGCGGCGGCACAGTTTGCGAATAATACAGAACCCGAGCTTATCCGGGTCGGACCGAGGGAGAATTCGGATCTTTCTTCTTCCTCATCGGAAATATTCCTGGCGGAATCGCCG…
StDREB36	ATGGCGGAACTTGTACAATCATCTCCCATTTCCGTGTCAAAAACAGAGGAACCAGAAGAGAAAGAGAAAGAGAAACGAATGGAAAAACGAAGAAGAGATGAATCTTACCCAGTATACAGAGGAGTTCGAATGCGAAGTTGGGGAAAATGGGTTTCTGAAATTCGACAACCGCGTAAGAAATCACGGATTTGGCTAGGTACTTATCCAACCCCTGAAATGGCTGCAAGAGCACATGACGTTGCTGCGCTTAGTATTAAAGGGAATTCAGCAATTCTCAATTTTCCTCAACTCGTTGAATCGTTGCCTCGTCCAGCTTCAATTTCACCTAGAGATGTTCAAGCTGCTGCTGCTAAAGCAGCTGCTATGGATGAACTAAATTCCTCTGTTTCTTCTTCTTCG…
StDREB37	ATGGTGCGGCCTAAAGTAAGCAAAGAGAAAAAAGTGAAAGGGGATCGTTACAAGGGTGTGCGTATGAGAAAATGGGGAAAATGGGTAGCTGAAGTACGGCAACCGAAAAGCCGTGACAGAATATGGTTAGGCTCTTACGATACGGCGGAAGAAGCGGCTAGAGCTTATGATGCAGCGGTGGTTTGCTTGCGTGGATCGTCCGCGATGATTAATTTCCCGGACGATCCACCGGTTATTTCGTGTGATGGTGATCATAAGTTGTTGTCACCTTCGGAAATTCAAGTTGAGGCATCGAGACATGCACGTAGTACTAGAGAAGAGTCTGCTGCAGCTGCTGATGATGCCGTAGACCACGGCAGATCAGCAGCTGTGGAGAGTGTGTTTTTTAGAGATGATTTG…
StDREB38	ATGGTGAAGACAGAGCAAAAAAGTTTAGTAGAGCCAAACAAGAAATCAATGTCAATATCATCATCATCTTCTTCAACATCAAGCAATATCAATAACATGAAGATGAAGAAGAATAAGTACAAAGGAGTTAGAATGAGAAGCTGGGGATCATGGGTATCAGAAATAAGAGCACCAAATCAAAAAACAAGAATCTGGTTAGGTTCCTATTCTACCCCTGAAGCTGCTGCTAGAGCTTATGATGCTGCACTTTTATGCCTAAAAGGCCCTTCTGCTTCTTCAAATCTCAACTTTCCTTTTGACTCTTCTTTCTATCACCACATTGATCATCACACTTCTACAACACTCTCTCCTAAAGCCATTCAGAGAGTGGCCGCGGCAGCCGCGGCCACTCCTGAACAA…
StDREB39	ATGGCTAGAGCACAACAAAGATATAGAGGAGTTCGACAGAGACATTGGGGTTCTTGGGTCTCCGAAATTCGCCATCCATTACTGAAGACAAGACTTTGGTTAGGCACATTTGAGACAGCAGAAGATGCAGCAAGAGCTTATGATGAAGCAGCAAGGCTTATGTGTGGTCCAAGAGCTAGAACCAATTTCCCCTACAACCCAAACATGCCACAAACATCTTCCTCTAAGCTTCTCTCAACTACATTAACAGCCAAGTTACACAAATGCTACATGGCTTCACTTCAAATGACCAAAACCTCACCACAAGAACAAAAAATAGCAAAAAATGCAACCAATGTTCAAGAAAGTGTTATTAATTCCTATAAAATGAAACAACAAATGTTGGTACCAAAGCCATCA…
StDREB40	ATGTCTCGACCACAACAAAGATATCGAGGTGTTCGCCAGCGGCATTGGGGATCTTGGGTTTCCGAAATTCGTCATCCTTCATTGAAGACAAGGATATGGCTAGGAACATTTGAGACATCAGAGGATGCTGCGAGGGCATATGATGAAGCAGCAAGACTCATGTGTGGTTCAACAGCACGGACTAATTTCCCTTACAATGCCACAGAGTCGACACGGTTTCTGTCTTCTGCTTTGATAGCTAAACTTCAAAAATGCCACATGACATCTCTCACTGCTACGTCAAAAAGACCTGGAAAGACAAAATTGGAAGATAAAAAAGAGAAGGAGATATCCACGAACAGGGGAGATGGAGAAGAAAGGCAGAGTGAGAGTGCATCACAACAGTACATGAAGGCACTG…
StDREB41	ATGGCAGCAGCTATAGATATATACAGCAGCAGTAACTTCTCAGATCCTTTAACAGAAGAACTTATGAAAGCACTTGAACCTTTTATGAAAGGTGCTTCTTGTTCTTCTTTTTCTTCATCTTCACCTTCTTCTTCTTCTTCTTCTTCTTTCTATACTTTTGGTGAGCCTAATTTGTATACTGATTTCTGTGCAATCCCATCAACGGCTACCCAAATGTTTTCTCAAGGGTATTCGTGTTTTAACAATATGGGTGTAGCTGAAACAGGTTCAATTGGGCTTAACCATCTAACCCCTTCTCAGATATTGCAAATCCAAGCTCAGATCCAATTCCAGAATCAACAGCAACTACTACAACTGCATCAACAACAACAGAGCTTAGGTTTGTTAACACCTACTTCA…
StDREB42	ATGGAAAATATTGAATCGATTGATAATGTTCAATCCATTATGTCAATGTATAGACCTTTAAAAAAGCTCAAAATTAACCCATCATCACAACATAATAGCCTTCGATCAAGTGGAGACGGGGTGGAGCCTGTAGCTCAGAGGATTAGAGCACGTGGCTACGAACCACAGTTTCGTTTTCCTTTTGCTCTAGATGATCCTCCATCAAGTAATTGTCACCTTAATTGGCAATCACTTACTCAAAATCAAACTATGATTTCTTTTGCACCTCAAAGTTGCTTTAATCAGTGTCGAATCACTGACAATGGGACGAGGACGACTACAATGATGAATGTTTATGGCACTGTCTCCTCCCCTGTACCTAAACAGTACAGGGGAGTGAGACAACGCCACTGGGGGAAA…
StDREB43	ATGTCAATGTATAGACCTTTGAAAAAGCTCAAAATTAGCCCATCATCACAACATAATAACCTTAGATCAAGTGGAGACGGGGTGGAGCCTGTAGCTCAGAGGATTAGAGCACATGGCTACGAATCACAGTTTCCTTTTCCTTTTGCTCTAGATGATCCTCCATCAAGTAATTGTCACATTAATTGGCAATCACTTACTCAAAACCAAACTATGATTTCTTTTGCACCTCAAAGTTGCTTTAATCAGTGTCGAATCACTAACAGTGGGACGAGGACGACTACGATGATGAATGTTTATGGCACTGTCTCCTCCCCTGCACCTAAACGGTACAGGGGAGTGAGACAACGCCACTGGGGGAAATGGGTAGCAGAGATTCGCCTTCCTCGTGAAAGAACTAGA…
StDREB44	ATGGCAACTTCTACAAAGGATTTTTGGACTACTACTCTTTTAGATCTTAACTCATCAAATTCTGGTGGTGAGCTTATGGAAGCACTTGCACCTTTTATTAAAAGTGCTTCTTCTCCTTCTCCTTCTCCTTCTGTTTCTCCATACTTTGATTTACAATCTTCTTCTCTATCAACTTCATATCTTTACGAATCATTTTCTTCAACGAGTCAACCTAATATGAGCTACTATGATAATGGTTGCTCCACTTCCAGCACGATAACCCCTACTTTTTCACAGGGGTTTTCGGGCATTATGGAAGCGGAGCAACCAGGCTCAATTTGGCTGAACCAAGCCCAAATCTATCTGCCACAGCAAATTATGCCAGCTGTCACTTTCCAGAATAATAATCAGTATGTTTCT…
StDREB45	ATGTCTTCATCAATAGGTCATGAGAGCCAAATTCATTATCAAGAGGCTGCAACTACAAATCCAACAAATTGGCTGAAAATGAATCAAACCATAACAAATTGTACCACAACAAAAGGTTTTAGTGACTATTGGCTTAGCACTACAAAAACTCAACCAATGAAATTCAAAGGATCATCAAGAAAATCATCACTTATTCATTATGAAAATTCGCCTTCATCTTCTTCTTCTTCTCCTTCTTCTATGACCGCGTCCCAAGGGAAGCTTTTTCGAGGAGTAAGACAAAGGCATTGGGGAAAATGGGTGGCGGAAATAAGGCTACCAAGAAATAGGACAAGGGTTTGGTTAGGTACATTCGATACTGCTGAAGAAGCTGCTTTTGCTTATGATACCGCGGCTTAT…
StDREB46	ATGGAAGATCATAATGAATTCTCCATCTCTAGTTCTACTACAACTTCATCATTTACAAGTTGTTGTTCTAATAACAATTGTTTAAGTTCTACTTCAACTTCTTCTACTTCATCTAATTGTTTCCATGAGAGCATTGCAAAAACCTCACCAAATGATCATTACAAGTGCAAATCCAAGAAAAGTTCAAAAAAAATTCAAGATGGGAATGAGGAGGAGGATGATAACAAGAAAATCAGACGAAAAAATGAAGGTGTTGTTGATGAAAAACATCCGACTTATAGAGGAGTTCGTAAGAGGAATTGGGGAAAATGGGTGTCCGAAATTAGACAACCAAGGAAAAAATCAAGAATTTGGCTAGGGACTTATCCCACAGCTGAAATGGCAGCTCGAGCTCATGAT…
StDREB47	ATGGCGGAACCAGAGGAACAAATGGAATTTGATGATAATACTTTTGAAAGACAACAAAGGAGGCCAGTTTTTGAAGAAGCTTCCATGTCTAATAGGCGTTTCAAAAAGATCAAAAGTCCGGAACGCCAATCCTCTGTTCAGCAGCCGTCTTTAAATTCATTTGTTCCTTGTAATAATCCAACATCAATGCCATTTCCTCCACCTCCGTCATCGTCAAGGCTTGTTTTTCCTTTTGCCTTTGATGGGACACAGCAATCCATGGATAGTTCATCCCAATTGGGAACGAACGCGATGCCTCTGTTTCATCCACAGCAGCAAAATCAGCAGCAAATGATCTCATTTTCGCCTCAACAATGTCTTTACCCTCCGTATTTTGCAGGGGATTTGGGTCCATCACAG…
StDREB48	ATGGCTGATTATCATTTTAACGTTTCCCCAAATGACAATTCTCCTCCTTTAGAAAATCTTTCACCCACTGGGGGCACCTTATTATCACCTCGTAGGCATCCGAATTTCAGAGGAATTCGACAGAGGAATGGGAAATGGGTCTCCGAAATTCGTGAGCCTCGAAAGACTACACGTATATGGTTAGGAACTTTCCCCAATCCCGAAATGGCAGCTGTCGCTTATGACGTTGCAGCTTTGGCATTAAAAGGCCCTGATGCCCAATTAAACTTTCCTGATTGTGCATACTCGTACCCTATCCCTGCTTCTCTGTCAGCCGCAGATATTCGTGCTGCGGCTGCAAATGCTGCTGCTGCTAGAGCACCTCCTTTGTCAGAATTCAGTACAGCTGGAGGTACTGCA…
StDREB49	ATGGACAGAAATCAAGAAAACAACTCTATGACTACCATATTTGATGAGGCTGCTAGAATTCGATCTTCGTTATCTCAACTAATTCTAACAAGTGGTACAAACACATTCGATACGATTTTTTCTCATTGCCAAGAAAATAACCAAATGACTAATAGTCCTGTTTTTGAGCCTTTAGGTACTTCAGTCTACCTCAGACAAAGAGATTTGCTACACAAATTCTGTCAAGAAAACATAGCAAATATCCCAATACCAACAACTTCCAAAACAATCCCTTTTCGAAACTCTTTGTATACACAGAGTTACAAGTTTCCAGAGAAGAAAAAACTATACAGAGGAGTAAGACAGAGGCATTGGGGAAAATGGGTTGCTGAGATAAGACTTCCACAGAATAGAATGAGA…
StDREB50	ATGGGTGAGCGTTTTGTTGTCTTGCCACATGTTGTACGTATTTACATAACAGACAATGACGCAACAAACTCGTCCAGTGATGAGGAAGAAAATCTTCAAGGAGAGATGTCCAAACGACATAAAAGGATTTGTAAAGAGATTATCATCAGAAATGGAAAAACCAATGTCACTTCCAAGATGGTATCGTCCAAAGAAAAAACAGACACAAAACTTCTCCAAGAAAATGTAAAGAATTACAGGGGAGTTAGACAACGAAAATGGGGAAGATGGGTTGCAGAGATTCGAGATGTAAGAATGAATAAACGACGTTGGTTGGGAAGTTTTGACACTGCGCTAGAAGCTGCTTTGGCTTATGACAAGGCAACCATTGAATTAAAAGGTGCTAATGCTGTGAAGGAA…
StDREB51	ATGATGAATGTTTATGGCACTGTCTCACAACGCCATTGGGGAAAATGGGTAGCAGAGATTCGCCTTCCTCGTAAAAGAACTAGACTTTTGTTAGGCACGTTTGGAAGTACTGAAGAAGCTGCTTTTGCTTACGATGTCGAGGCCTCTAGGCTCAGAGGAACAGATGCACGTCTTAATTTCCCACATCTGGTTTTGGCCTTTGATATGTTCAATTCTTGA
StDREB52	ATGGTACAGGCAAAGAAGTTTAGAGGTGTCAGGCAACGCCATTGGGGTTCTTGGGTTGCTGAAATTCGTCATCCTTTGCTGAAGAGGAGAGTGTGGCTAGGAACTTTTGAAACTGCGGAGGAAGCTGCCCGAGCGTATGATGAGGCTGCGGTTTTAATGAGCGGACGTAACGCCAAAACAAATTTCCCAGTGCAGGCTACTGATGAAAATAAAAAAGACAACTCTAAATCTAATAATTCGGCTTTATCGGCCGGATCATCATCATCATCACTCTCTGCTATACTTAGCGCCAAACTTCGCAAGAGCTGTAAATCGCCTTCGCCGTCTCTCACTTGCCTCAGGCTTGATACGGAGAGTTCCAACATTGGGGTGTGGCAGAAACGGGCAGGAGCCCGGCCT…
StDREB53	ATGAGTTCAGGTGCAAAATACAGAGGGATTCGGAGGAGAAAATGGGGGAAATGGGTGTCGGAAATTCGAGTTCCAGGTAGTAGTGAACGGCTTTGGCTAGGTACTTACACTAGCCCTGAAGCTGCAGCTATAGCACATGACATTGCCTATTATTGTCTCCGTCCAGAATCATCGTCTTTACATAAATTAAACTTCCCTTCCATGTTACCGCCTAATGTTCAACCTGGAATGTCACCAACATCTGTACAAAAAGTTGCCTCTGATGCTGCCATGGCTATTGATGCTCAGTTTCTTACAATACCAACACCTGCTCAACAACATCGTCAAACTGCTGATAATTATGGGCAAAATCAAGGTCTCAACATTTCTGTTGAAGATTATCAATATTGA
StDREB54	ATGGAAGCCAACCCTACTCATGATCAGCCAAAGTTCAAAGGAGTTCGGTTGAGAAAATGGGGGAAATGGGTTTCTGAAGTCAGATTGCCTAATAGCCGCGACAGGATTTGGTTGGGCTCATACGATTCTGCTGAGAAAGCCGCAAGGGCTTTTGATGCTGCACAGTTCTGCCTCCGCGGGCCGAAAGCTAAGTTTAATTTCCCTGATAGTCCGCCGGATATATCCGGTGGACAAAGGCTTTCCCCCGCAGAGATACAGGCTGTAGCAGCTAGATTTGCGAATGATTACTCGCCGTCAGTGGTACAGGAGATACAGCGTGATGACCATGAGGGCAATATTGGAAATATTAATTCACACGTGATAAATATGGAAAAAGATGAGATTTCGCTATCAACAACT…
StDREB55	ATGTCTTACACATATGATGAGGCTGCTCAAATTAGATCTTCTTTATCTCAAATCCTATTAACAAGTAGTACCAACACTTTAGACTCAATATTTTTTCATTGCCAAGAACCAAAAAATCAAATGACTACTACTAGTCCTGTTCTTGAACCACTATGTTCTTCAGTCTATCTCAGACAAAAAGATTTGCTCCAAAATTTTTGGGAACAAAACAGAACAAATATCACAATTCCAACAACTTCCACACAAACCCCACTTCAAGAATCATTATACTCACAAAGATATGTTAGTCCAAACAAGAAAAAGTTATATAGAGGAGTGAGACAAAGGCATTGGGGAAAATGGGTGGCTGAAATAAGACTTCCTCAGAAGAGAATGAGAGTTTGGCTTGGAACTTATGAC…
StDREB56	ATGAGAGGTCCTGATGCTGTGACAAACATCCTTAAGCCACCACCAAGAGAGGTACAACCAATGGAAAACAACCTCATCAACCCACCGCCAAAGGAGATCAATTTTATGAATCTTTCATCTTCATCCTCAAATGATGCTAGGATTGTGTGGATTACTGATTCTAGTAATGAGCCAACAACTTATTGTGATGGCTTGGACTTGGACCTTTACGCTAGTTCCGTCCCTGATTGTTGGATGTTTGTCGCAAGAATATCACGAAAAGAAGGTTATCAGAAAACCCTAAAAAATGATGCCACTAAAAAATCAACTGTTCAAGTAGAAGGAAGTTCTTCTGTCCAACCCAACCCCGCAGGAGTTTACTTGTGGGGTGTCAATCTGATGAACGTGTCTAATGAGGAT…
StDREB57	ATGAATAACGACTCGAGTTTGTACTCGTCAGATCTCAACCCATTAAGTGCAACAATAGCTTCCGATGAGGAAGGAATACTATTACTAGCTTCAAGCCGACCCAAGAAACGTGCAGGGAGGAAGAAGTTCAAGGAAACTCGCCACCCGATTTATAGGGGAGTGAGGAGGAGGAATAATAGCAAGTGGGTTTGCGAGCTACGTGAGCCTAGTCAACAGAAAAGAATATGGCTAGGGACTTACTCTACTCCTGAAATGGCGGCTCGAGCTCATGATGTTGCTGCATTAGCTCTTAGAGGTAATCTAGCCACTCTGAACTTTGCTGACTCTCGTTGGCGATTGCCAGTGCCCGCATCAAAGGACCCCAAGGACATACGACAGGCGGCAGTTATAGCCGCACAA…
StDREB58	ATGGCGGCTAGAGCTCATGACGTGGCAGCTTTAGCATTAAGAGGCCGTTCTGCTTGCTTGAATTTCGCTGATTCTGCTTGGAGGTTGCCTATCCCTGCTTCCTCCAACTCTAAGGATATTCAAAAGGCGGCCGCTGAGGCCGCCGAAATCTTCCGACCATCAGAAGAGTCGGAAAGAGTTGCAAGTTCTGAAATGCATGAGAGTATATTTTTTATGAACGATGAAGGACGAGAGAGTAGTTTCTTCATGGATGAGGAAGCGTTGTTCGACATGCCGGGATTAATTGCGAATATGGCGGAAGGACTAATGCTACCTCCACCGCAATGTGCAGAAGTAGAAGATCATTATTATATGGAAGCTGATGATGCTTACATGCCTTTATGGAATTATTAG
StDREB59	ATGGCGGCTAGAGCTCATGACGTGGCGGCTATAGCATTAAGAGGAGGTTCTGCATGTTTGAATTTCGCTGACTCTGCTTGGAGGTTGCCTACCCCGGCTTCCTCTGACACTAAGGATATTCAAAAGGCGGCCGCTGAGGCCGCCGAATCCTTCCGACCATTGAAGTCGGAAGAAGAATCAGTAGTTAGTACTGGAGATCAATCTAGTACTCCGGATAATATGTTTTTTATGGATGAGGAAGCGCTGTTCTGCATGCCGGGATTACTTACGAATATGGCGGAAGGATTAATGGTACCTCCACCTCAATGTACTGAAATGGGAGATCATGTGGAAGCTGATGATATGCCTCTATGGAGCTATTCTATCTAA
StDREB60	ATGGCCAACCTTTCACATACTAGTGGTCAATTAGTACCAAACATTCTAGTTGACAACAAAAAAAGTGCAAGAACAAATACCAAACATCCTATATACCGTGGTATACGTTGTAGAAGTGGAAAATGGGTGTGTGAAATTAGAGAGCCACGTAAAACAACAAGAATATGGTTAGGTACATACCCTACTCCACAAACGGCTGCTGCTGCCTATGATGTTGCTGCCTTAGCTCTTAAGGGTACTCAGAATATTGTACTCAATTTTCCTCATCTTGTCAATTCTTATCCAAAGCTCCCTCCCTCACCATCTCCGGACAATATACGTTGCGCCGCGGCCACAGCGGCAACGATGATGGCTCAACGAGGTGACGATGGTCGGTCGTCGGGAAGCAAGACAACAGCT…
StDREB61	ATGAAGCCACCAGTACCTCAGCCAAGTGACGGTATTAGAACACGAAGAAAACCATCATCAAGGGGCCATCCAAGATTTGTTGGTGTTCGCCAAAGGCCATCAGGAAGATGGGTTGCAGAGATCAAAGATTCTTTACAAAAGGTGAGGCTATGGCTTGGTACTTTTGACACTGCTGAGGATGCTGCAAGGGCATATGATCAAGCTGCTCGCACATTAAGAGGGGCTAATGCTCGTACTAATTTTGAACTACCCGCGTCTGATTCCCACCAAGGTAGTAGTATTCTTGAAAATTCTGTGCCTTTTAACTTTGAAGAAGCCTGCAGAACAGAGGAACCTGAAAATAGTCTTGTTGGTGCACTTAAAGCTAAACTCTTTAACAGCAAGAATTCAAGATCTTTC…
StDREB62	ATGAAAACCACCATCACAACCAACACCAACACCACCAAATCATCATCAACACAACCAAAGAAATCATCAATAACAAGAAAATTTGTAGGTGTAAGACAAAGACCCTCTGGAAGATGGGTTGCTGAGATAAAGGACTCGTCTCAACGTGTGAGATTATGGCTAGGAACATACGATACTGCTGAAGAAGCTGCTCATGCCTACGATGAAGCTGCCCGAGCCCTACGAGGCGAAAATGCACGAACCAACTTCGCTTCTACTGCTCCAAATTCCGATATGGATCAATCGCATAGTTCACATGATACTAAACATGGTCTTAGCTTTTCTTCTATAAAAGAGAAATTAAGTAAGAACTTACAAAGCATCATGGCTAGGAATTCAGAAAATAAGTCTTCTTCATCG…
StDREB63	ATGAATAGCACCAGTGCAGGTAGTAATAATGATCAACATCCCCACCCTACCCAAGACTTAGACCTCACCAACCAAGAAGATAAAACAACTACTGCTTCTCTCACCACACAAACCAGCAGTGAAGAGAATAGTTCAAGTAGGAACAAGAAAGGTAGTAAAGGCAAAGGAGGACCTGATAACAACAAATTCAGGTATCGAGGAGTTAGACAACGCAGCTGGGGCAAGTGGGTCGCTGAGATCCGTGAGCCCCGTAAACGGACTCGCCGTTGGCTCGGTACTTTCGCCACTGCTGAAGATGCTGCTCGAGCTTATGACCGTGCCGCTATTATACTCTACGGTTCAAAGGCTCAGCTCAATCTTCAACCTTCAGGTGCAAACGCTACTAGTTCATCATCAAAT…
StDREB64	ATGAATAGCACCAGTGCAGGTAGTGATAATCCCCACCCTACCCAAGACATTAACCACCAAGAAAAATCCACCAGTGAGGAGAAAAGCAACAAGAAAGGTAGTAAAGGCAAAGGAGGACCTGATAACAACAAATTCAGGTATCGAGGAGTTAGACAACGCAGCTGGGGCAAGTGGGTAGCTGAGATCCGAGAGCCCCGTAAACGGACACGCCGTTGGCTCGGTACTTTCGCCACTGCTGAAGATGCTGCTCGAGCTTATGACCGTGCCGCTATTATACTCTACGGTTCAAAGGCTCAGCTCAATCTTCAACCTTCAGGTGCAAACGCTAGTAGTTCATCATCAAATTCTTCTAAACGCGGATCTACATCTTCTACTACACAAACTCTTCGTCCTTTACTT…
StDREB65	ATGACATCCAAGAATAAGTATCACGAAAAGAAGGTCATTAGAAAACCCTCAAAAAATGATGCCACTAAAAATTCAACTGTTCAAGTAGAAGGAAGTTCTTCTATCCAACCCAACCCTGCAAGAGTTTACTTGTGGGGTGTCGATCTGATGAATCTATCTAATCATGAGGATAAAGGGAAGGTCAAGGAAGAGAAGTCAAAGGGACGTGATAAGACACGTCAAAAGAAAATCTTCAGTGAGAATGAAAATGTCAAGGCAATTTCAATTGAAAATTCAAAAGAGAAACCACAAGAAAATGTGGAAAAGTATAAAGGGGTTAGGCAGAGAAAATGGGGAAAGTGGGTTGCAGAGGTATATGACCCAAGAACGAAAGGCCGAATTTGGTTAGGGACATTTAAC…
StDREB66	ATGGAAAACTCAAAATCCTCATCAGAGTCCTTAAATAACTCATCCAAAAACATCCAACAAAATAAGCCAATTTCCTCAAATGATGGAAAGAAATTTATTGGAGTTAGACAAAGGCCATCAGGCAGATGGGTTGCTGAAATCAAAGAAACTTCACAAAAACTCAGGCTATGGCTTGGTACTTTTGACAAAGCAGAGGAAGCTGCTCTGGCTTATGATAGTGCTGCACGTCTTCTTCGAGGAAGAAACGCGAAAACAAATTTCAAGAACCAGGGAATCTTGAAACCAAATGAAGAGAATTGCAGTTTGTTGGAAAAAAATCCAAGATTATATCAACTTATGAAACATGCCATCATGAAGAAACTTGCAGGGAAATATCAAAATAATGAACGTTTAGAAACA…
