# Supplementary material for: Genome-wide analysis, identification, evolution and genomic organization of dehydration responsive element-binding (DREB) gene family in Solanum tuberosum
Source: PeerJ. 2021 Jun 24;9:e11647. doi: 10.7717/peerj.11647 (PMC8236231; doi:10.7717/peerj.11647)
Supplement: Supplemental Information 9 [file peerj-09-11647-s009.xlsx]

## Sheet: Sheet1
WoLF PSORT SUBCEULLAR LOCALIZATION PREDICTION
Gene name	Nucl	Chlo	Mito	Cyto-nucl	Extr	Plas	Glog-plas	Cysk	Cyto	Cysk-nucl	Nucl-Plas	Pero
StDREB1	7	6	1
StDREB2	12.5	1		7
StDREB3	14
StDREB4	14
StDREB5	14
StDREB6	12		1						1
StDREB7	3.5	2	3		4				1	2.5
StDREB8	10		3		1
StDREB9	7	2	3			1			1
StDREB10	4	7	3
StDREB11	13.5			7.5
StDREB12	10		2						2
StDREB13	11								3
StDREB14	9	5
StDREB15	13					1
StDREB16	5	4	3		2
StDREB17	12		1			1
StDREB18	11				1				2
StDREB19	9	4	1
StDREB20	7		4						3
StDREB21	3	4	3		1
StDREB22	13					1
StDREB23	12.5	1		7
StDREB24	14
StDREB25	11		1						2
StDREB26	13.5			7.5
StDREB27	12								2
StDREB28	11	1							2
StDREB29	11	1	1						1
StDREB30	14
StDREB31	9		3				1		1
StDREB32	13								1
StDREB33	7	1				1			5
StDREB34	8	2	4
StDREB35	2	2	1						9
StDREB36	14
StDREB37	4	2	3						5
StDREB38	12		1		1
StDREB39	2	3	9
StDREB40	6.5	1	5					1		4
StDREB41	14
StDREB42	13								1
StDREB43	8		3			1.5	1.5	1
StDREB44	13.5									7.5
StDREB45	10	2							2
StDREB46	14
StDREB47	14
StDREB48	8.5		3			2.5					6
StDREB49	12.5			7				1
StDREB50		1							13
StDREB51	1	6	2					1	4
StDREB52	8	4	1				1
StDREB53	9.5		2	5.5		1.5	1.5
StDREB54	2								12
StDREB55	13.5			7.5
StDREB56	2.5	1		3					2.5			8
StDREB57	9								5
StDREB58	1	10	3
StDREB59	4	4	6
StDREB60	2	12
StDREB61	8	3	1				1	1
StDREB62	6.5	3	4	4
StDREB63	14
StDREB64	14
StDREB65	10								4
StDREB66	11.5			7	1				1.5

## Sheet: Sheet2
Predicted Sub-celullar Localization of DREB Genes
Gene name	CELLO ONLINE SERVER v.2.5
StDREB1	Cytoplasm; Mitochondria
StDREB2	Chloroplast
StDREB3	Nucleus
StDREB4	Nucleus
StDREB5	Nucleus
StDREB6	Nucleus; Chloroplast
StDREB7	Chloroplast; Cytoplasm
StDREB8	Nucleus; Chloroplast; Cytoplasm
StDREB9	Nucleus
StDREB10	Nucleus
StDREB11	Nuclues
StDREB12	Nucleus
StDREB13	Nucleus
StDREB14	Nucleus
StDREB15	Nucleus
StDREB16	Nucleus
StDREB17	Chloroplast
StDREB18	Nucleus
StDREB19	Nucleus
StDREB20	Nucleus; Chloroplast
StDREB21	Nucleus
StDREB22	Nucleus
StDREB23	Nucleus
StDREB24	Nucleus
StDREB25	Nucleus; Cytoplasm
StDREB26	Nucleus
StDREB27	Nucleus
StDREB28	Nucleus
StDREB29	Nucleus
StDREB30	Nucleus
StDREB31	Nucleus
StDREB32	Nucleus; Cytoplasm
StDREB33	Nuc; Cyt; Chlro; Mito
StDREB34	Nucleus
StDREB35	Nucleus; Cytoplasm
StDREB36	Nucleus; Cytoplasm
StDREB37	Chloroplast; Cytoplasm
StDREB38	Nucleus
StDREB39	Nucleus
StDREB40	Nucleus
StDREB41	Nucleus
StDREB42	Nucleus
StDREB43	Nucleus
StDREB44	Nucleus
StDREB45	Nucleus
StDREB46	Nucleus
StDREB47	Nucleus
StDREB48	Nucleus
StDREB49	Nucleus
StDREB50	Nucleus
StDREB51	Nucleus; Mitochondria
StDREB52	Nucleus
StDREB53	Nucleus
StDREB54	Nucleus
StDREB55	Nucleus
StDREB56	Nucleus
StDREB57	Nucleus
StDREB58	Cytoplasm; Chloroplast
StDREB59	Cytoplasm; Chloroplast
StDREB60	Nucleus
StDREB61	Nucleus
StDREB62	Nucleus
StDREB63	Nucleus
StDREB64	Nucleus
StDREB65	Nucleus
StDREB66	Nucleus
